# Supplementary material
Source: ML conference proceedings conference paper supplement (https://openreview.net/forum?id=SYnIf4LxAG)
Supplement: supplementary_material [file attachment]

## Sheet: vtab_all_release
type	total_prompt / reduction rate	data	feature	lr	wd	total_params	tuned_params	tuned / total (%)	batch_size	l-test_top1
adapter_best	8	vtab-patch_camelyon	sup_vith14_imagenet21k	0.005	0.01	643920642	13155842	2.0431	28	78.74
adapter_best	8	vtab-patch_camelyon	sup_vith14_imagenet21k	0.005	0.01	643920642	13155842	2.0431	28	75.53
adapter_best	8	vtab-patch_camelyon	sup_vith14_imagenet21k	0.005	0.01	643920642	13155842	2.0431	28	77.51
adapter_best	256	vtab-patch_camelyon	sup_vitb16_imagenet21k	0.005	0.01	85864742	66086	0.077	128	75.6
adapter_best	256	vtab-patch_camelyon	sup_vitb16_imagenet21k	0.005	0.01	85864742	66086	0.077	128	75.1
adapter_best	256	vtab-patch_camelyon	sup_vitb16_imagenet21k	0.005	0.01	85864742	66086	0.077	128	78.32
adapter_best	64	vtab-patch_camelyon	sup_vitl16_imagenet21k	0.005	0	304115074	813442	0.2675	64	73.55
adapter_best	64	vtab-patch_camelyon	sup_vitl16_imagenet21k	0.005	0	304115074	813442	0.2675	64	76.97
adapter_best	64	vtab-patch_camelyon	sup_vitl16_imagenet21k	0.005	0	304115074	813442	0.2675	64	76.78
adapter_best	64	vtab-resisc45	sup_vith14_imagenet21k	0.005	0.001	632502445	1737645	0.2747	28	70.83
adapter_best	64	vtab-resisc45	sup_vith14_imagenet21k	0.005	0.001	632502445	1737645	0.2747	28	71.14
adapter_best	64	vtab-resisc45	sup_vith14_imagenet21k	0.005	0.001	632502445	1737645	0.2747	28	70.44
adapter_best	64	vtab-resisc45	sup_vitb16_imagenet21k	0.005	0.0001	86063805	265149	0.3081	128	73.71
adapter_best	64	vtab-resisc45	sup_vitb16_imagenet21k	0.005	0.0001	86063805	265149	0.3081	128	73.75
adapter_best	64	vtab-resisc45	sup_vitb16_imagenet21k	0.005	0.0001	86063805	265149	0.3081	128	73.56
adapter_best	8	vtab-resisc45	sup_vitl16_imagenet21k	0.005	0.001	309666861	6365229	2.0555	64	61.59
adapter_best	8	vtab-resisc45	sup_vitl16_imagenet21k	0.005	0.001	309666861	6365229	2.0555	64	64.48
adapter_best	8	vtab-resisc45	sup_vitl16_imagenet21k	0.005	0.001	309666861	6365229	2.0555	64	64.13
adapter_best	8	vtab-smallnorb(predicted_attribute="label_azimuth")	sup_vitl16_imagenet21k	0.005	0.0001	309639186	6337554	2.0468	64	9.93
adapter_best	8	vtab-smallnorb(predicted_attribute="label_azimuth")	sup_vitl16_imagenet21k	0.005	0.0001	309639186	6337554	2.0468	64	10.79
adapter_best	8	vtab-smallnorb(predicted_attribute="label_azimuth")	sup_vitl16_imagenet21k	0.005	0.0001	309639186	6337554	2.0468	64	10.1
adapter_best	256	vtab-smallnorb(predicted_attribute="label_azimuth")	sup_vith14_imagenet21k	0.005	0.0001	631238578	473778	0.0751	28	12.33
adapter_best	256	vtab-smallnorb(predicted_attribute="label_azimuth")	sup_vith14_imagenet21k	0.005	0.0001	631238578	473778	0.0751	28	10.95
adapter_best	256	vtab-smallnorb(predicted_attribute="label_azimuth")	sup_vith14_imagenet21k	0.005	0.0001	631238578	473778	0.0751	28	12.43
adapter_best	64	vtab-smallnorb(predicted_attribute="label_azimuth")	sup_vitb16_imagenet21k	0.005	0.0001	86043042	244386	0.284	128	13.2
adapter_best	64	vtab-smallnorb(predicted_attribute="label_azimuth")	sup_vitb16_imagenet21k	0.005	0.0001	86043042	244386	0.284	128	13.68
adapter_best	64	vtab-smallnorb(predicted_attribute="label_azimuth")	sup_vitb16_imagenet21k	0.005	0.0001	86043042	244386	0.284	128	13.54
adapter_best	8	vtab-cifar(num_classes=100)	sup_vitl16_imagenet21k	0.005	0.01	309723236	6421604	2.0733	64	75.34
adapter_best	8	vtab-cifar(num_classes=100)	sup_vitl16_imagenet21k	0.005	0.01	309723236	6421604	2.0733	64	74.68
adapter_best	8	vtab-cifar(num_classes=100)	sup_vitl16_imagenet21k	0.005	0.01	309723236	6421604	2.0733	64	75.73
adapter_best	256	vtab-cifar(num_classes=100)	sup_vitb16_imagenet21k	0.005	0.0001	85940104	141448	0.1646	128	73.92
adapter_best	256	vtab-cifar(num_classes=100)	sup_vitb16_imagenet21k	0.005	0.0001	85940104	141448	0.1646	128	73.89
adapter_best	256	vtab-cifar(num_classes=100)	sup_vitb16_imagenet21k	0.005	0.0001	85940104	141448	0.1646	128	74.59
adapter_best	8	vtab-cifar(num_classes=100)	sup_vith14_imagenet21k	0.005	0.001	644046180	13281380	2.0622	28	69.24
adapter_best	8	vtab-cifar(num_classes=100)	sup_vith14_imagenet21k	0.005	0.001	644046180	13281380	2.0622	28	69.46
adapter_best	8	vtab-cifar(num_classes=100)	sup_vith14_imagenet21k	0.005	0.001	644046180	13281380	2.0622	28	69.4
adapter_best	8	vtab-clevr(task="count_all")	sup_vitb16_imagenet21k	0.005	0.0001	87584648	1785992	2.0392	128	44.79
adapter_best	8	vtab-clevr(task="count_all")	sup_vitb16_imagenet21k	0.005	0.0001	87584648	1785992	2.0392	128	49.5
adapter_best	8	vtab-clevr(task="count_all")	sup_vitb16_imagenet21k	0.005	0.0001	87584648	1785992	2.0392	128	41.4
adapter_best	256	vtab-clevr(task="count_all")	sup_vith14_imagenet21k	0.005	0.0001	631225768	460968	0.073	28	27.81
adapter_best	256	vtab-clevr(task="count_all")	sup_vith14_imagenet21k	0.005	0.0001	631225768	460968	0.073	28	29.56
adapter_best	256	vtab-clevr(task="count_all")	sup_vith14_imagenet21k	0.005	0.0001	631225768	460968	0.073	28	28.43
adapter_best	8	vtab-clevr(task="count_all")	sup_vitl16_imagenet21k	0.005	0.001	309628936	6327304	2.0435	64	35.97
adapter_best	8	vtab-clevr(task="count_all")	sup_vitl16_imagenet21k	0.005	0.001	309628936	6327304	2.0435	64	36
adapter_best	8	vtab-clevr(task="count_all")	sup_vitl16_imagenet21k	0.005	0.001	309628936	6327304	2.0435	64	34.13
adapter_best	64	vtab-svhn	sup_vith14_imagenet21k	0.005	0.01	632457610	1692810	0.2677	28	36.24
adapter_best	64	vtab-svhn	sup_vith14_imagenet21k	0.005	0.01	632457610	1692810	0.2677	28	31.55
adapter_best	64	vtab-svhn	sup_vith14_imagenet21k	0.005	0.01	632457610	1692810	0.2677	28	33
adapter_best	256	vtab-svhn	sup_vitb16_imagenet21k	0.005	0.0001	85870894	72238	0.0841	128	35.25
adapter_best	256	vtab-svhn	sup_vitb16_imagenet21k	0.005	0.0001	85870894	72238	0.0841	128	34.8
adapter_best	256	vtab-svhn	sup_vitb16_imagenet21k	0.005	0.0001	85870894	72238	0.0841	128	33.64
adapter_best	256	vtab-svhn	sup_vitl16_imagenet21k	0.005	0.01	303533162	231530	0.0763	64	33.81
adapter_best	256	vtab-svhn	sup_vitl16_imagenet21k	0.005	0.01	303533162	231530	0.0763	64	30
adapter_best	256	vtab-svhn	sup_vitl16_imagenet21k	0.005	0.01	303533162	231530	0.0763	64	30.12
adapter_best	256	vtab-smallnorb(predicted_attribute="label_elevation")	sup_vitl16_imagenet21k	0.005	0.01	303532137	230505	0.0759	64	19.38
adapter_best	256	vtab-smallnorb(predicted_attribute="label_elevation")	sup_vitl16_imagenet21k	0.005	0.01	303532137	230505	0.0759	64	21.28
adapter_best	256	vtab-smallnorb(predicted_attribute="label_elevation")	sup_vitl16_imagenet21k	0.005	0.01	303532137	230505	0.0759	64	18.61
adapter_best	8	vtab-smallnorb(predicted_attribute="label_elevation")	sup_vitb16_imagenet21k	0.005	0.001	87585417	1786761	2.04	128	20.99
adapter_best	8	vtab-smallnorb(predicted_attribute="label_elevation")	sup_vitb16_imagenet21k	0.005	0.001	87585417	1786761	2.04	128	22.04
adapter_best	8	vtab-smallnorb(predicted_attribute="label_elevation")	sup_vitb16_imagenet21k	0.005	0.001	87585417	1786761	2.04	128	22.99
adapter_best	8	vtab-smallnorb(predicted_attribute="label_elevation")	sup_vith14_imagenet21k	0.005	0.0001	643929609	13164809	2.0444	28	19.14
adapter_best	8	vtab-smallnorb(predicted_attribute="label_elevation")	sup_vith14_imagenet21k	0.005	0.0001	643929609	13164809	2.0444	28	17.76
adapter_best	8	vtab-smallnorb(predicted_attribute="label_elevation")	sup_vith14_imagenet21k	0.005	0.0001	643929609	13164809	2.0444	28	18.84
adapter_best	8	vtab-kitti(task="closest_vehicle_distance")	sup_vitl16_imagenet21k	0.005	0.01	309624836	6323204	2.0422	64	47.26
adapter_best	8	vtab-kitti(task="closest_vehicle_distance")	sup_vitl16_imagenet21k	0.005	0.01	309624836	6323204	2.0422	64	48.8
adapter_best	8	vtab-kitti(task="closest_vehicle_distance")	sup_vitl16_imagenet21k	0.005	0.01	309624836	6323204	2.0422	64	45.15
adapter_best	8	vtab-kitti(task="closest_vehicle_distance")	sup_vith14_imagenet21k	0.005	0.001	643923204	13158404	2.0435	28	56.4
adapter_best	8	vtab-kitti(task="closest_vehicle_distance")	sup_vith14_imagenet21k	0.005	0.001	643923204	13158404	2.0435	28	55.27
adapter_best	8	vtab-kitti(task="closest_vehicle_distance")	sup_vith14_imagenet21k	0.005	0.001	643923204	13158404	2.0435	28	53.87
adapter_best	8	vtab-kitti(task="closest_vehicle_distance")	sup_vitb16_imagenet21k	0.005	0.001	87581572	1782916	2.0357	128	56.82
adapter_best	8	vtab-kitti(task="closest_vehicle_distance")	sup_vitb16_imagenet21k	0.005	0.001	87581572	1782916	2.0357	128	57.24
adapter_best	8	vtab-kitti(task="closest_vehicle_distance")	sup_vitb16_imagenet21k	0.005	0.001	87581572	1782916	2.0357	128	55.13
adapter_best	256	vtab-diabetic_retinopathy(config="btgraham-300")	sup_vitl16_imagenet21k	0.005	0.0001	303528037	226405	0.0746	64	68.77
adapter_best	256	vtab-diabetic_retinopathy(config="btgraham-300")	sup_vitl16_imagenet21k	0.005	0.0001	303528037	226405	0.0746	64	70.17
adapter_best	256	vtab-diabetic_retinopathy(config="btgraham-300")	sup_vitl16_imagenet21k	0.005	0.0001	303528037	226405	0.0746	64	69.63
adapter_best	64	vtab-diabetic_retinopathy(config="btgraham-300")	sup_vith14_imagenet21k	0.001	0.01	632451205	1686405	0.2666	28	70.8
adapter_best	64	vtab-diabetic_retinopathy(config="btgraham-300")	sup_vith14_imagenet21k	0.001	0.01	632451205	1686405	0.2666	28	71.29
adapter_best	64	vtab-diabetic_retinopathy(config="btgraham-300")	sup_vith14_imagenet21k	0.001	0.01	632451205	1686405	0.2666	28	71.07
adapter_best	64	vtab-diabetic_retinopathy(config="btgraham-300")	sup_vitb16_imagenet21k	0.001	0.0001	86033045	234389	0.2724	128	70.1
adapter_best	64	vtab-diabetic_retinopathy(config="btgraham-300")	sup_vitb16_imagenet21k	0.001	0.0001	86033045	234389	0.2724	128	70.97
adapter_best	64	vtab-diabetic_retinopathy(config="btgraham-300")	sup_vitb16_imagenet21k	0.001	0.0001	86033045	234389	0.2724	128	71.71
adapter_best	256	vtab-caltech101	sup_vitl16_imagenet21k	0.005	0.0001	303627462	325830	0.1073	64	84.73
adapter_best	256	vtab-caltech101	sup_vitl16_imagenet21k	0.005	0.0001	303627462	325830	0.1073	64	83.73
adapter_best	256	vtab-caltech101	sup_vitl16_imagenet21k	0.005	0.0001	303627462	325830	0.1073	64	84.02
adapter_best	8	vtab-caltech101	sup_vitb16_imagenet21k	0.005	0.001	87656934	1858278	2.1199	128	85.73
adapter_best	8	vtab-caltech101	sup_vitb16_imagenet21k	0.005	0.001	87656934	1858278	2.1199	128	85.39
adapter_best	8	vtab-caltech101	sup_vitb16_imagenet21k	0.005	0.001	87656934	1858278	2.1199	128	86.08
adapter_best	64	vtab-caltech101	sup_vith14_imagenet21k	0.005	0.01	632575462	1810662	0.2862	28	84.88
adapter_best	64	vtab-caltech101	sup_vith14_imagenet21k	0.005	0.01	632575462	1810662	0.2862	28	84.07
adapter_best	64	vtab-caltech101	sup_vith14_imagenet21k	0.005	0.01	632575462	1810662	0.2862	28	84.12
adapter_best	64	vtab-sun397	sup_vith14_imagenet21k	0.005	0.001	632953357	2188557	0.3458	28	45.05
adapter_best	64	vtab-sun397	sup_vith14_imagenet21k	0.005	0.001	632953357	2188557	0.3458	28	45.49
adapter_best	64	vtab-sun397	sup_vith14_imagenet21k	0.005	0.001	632953357	2188557	0.3458	28	45.24
adapter_best	8	vtab-sun397	sup_vitb16_imagenet21k	0.005	0.01	87883789	2085133	2.3726	128	50.91
adapter_best	8	vtab-sun397	sup_vitb16_imagenet21k	0.005	0.01	87883789	2085133	2.3726	128	50.56
adapter_best	8	vtab-sun397	sup_vitb16_imagenet21k	0.005	0.01	87883789	2085133	2.3726	128	50.5
adapter_best	256	vtab-sun397	sup_vitl16_imagenet21k	0.005	0.0001	303929837	628205	0.2067	64	53.04
adapter_best	256	vtab-sun397	sup_vitl16_imagenet21k	0.005	0.0001	303929837	628205	0.2067	64	52.61
adapter_best	256	vtab-sun397	sup_vitl16_imagenet21k	0.005	0.0001	303929837	628205	0.2067	64	52.92
adapter_best	64	vtab-dsprites(predicted_attribute="label_orientation",num_classes=16)	sup_vith14_imagenet21k	0.005	0.01	632465296	1700496	0.2689	28	16.1
adapter_best	64	vtab-dsprites(predicted_attribute="label_orientation",num_classes=16)	sup_vith14_imagenet21k	0.005	0.01	632465296	1700496	0.2689	28	15.37
adapter_best	64	vtab-dsprites(predicted_attribute="label_orientation",num_classes=16)	sup_vith14_imagenet21k	0.005	0.01	632465296	1700496	0.2689	28	14.06
adapter_best	256	vtab-dsprites(predicted_attribute="label_orientation",num_classes=16)	sup_vitb16_imagenet21k	0.005	0.01	85875508	76852	0.0895	128	24.18
adapter_best	256	vtab-dsprites(predicted_attribute="label_orientation",num_classes=16)	sup_vitb16_imagenet21k	0.005	0.01	85875508	76852	0.0895	128	27.27
adapter_best	256	vtab-dsprites(predicted_attribute="label_orientation",num_classes=16)	sup_vitb16_imagenet21k	0.005	0.01	85875508	76852	0.0895	128	24.71
adapter_best	64	vtab-dsprites(predicted_attribute="label_orientation",num_classes=16)	sup_vitl16_imagenet21k	0.005	0.0001	304129424	827792	0.2722	64	23.36
adapter_best	64	vtab-dsprites(predicted_attribute="label_orientation",num_classes=16)	sup_vitl16_imagenet21k	0.005	0.0001	304129424	827792	0.2722	64	23.34
adapter_best	64	vtab-dsprites(predicted_attribute="label_orientation",num_classes=16)	sup_vitl16_imagenet21k	0.005	0.0001	304129424	827792	0.2722	64	23.42
adapter_best	64	vtab-dmlab	sup_vitl16_imagenet21k	0.005	0.0001	304119174	817542	0.2688	64	30.22
adapter_best	64	vtab-dmlab	sup_vitl16_imagenet21k	0.005	0.0001	304119174	817542	0.2688	64	30.84
adapter_best	64	vtab-dmlab	sup_vitl16_imagenet21k	0.005	0.0001	304119174	817542	0.2688	64	31.26
adapter_best	8	vtab-dmlab	sup_vith14_imagenet21k	0.005	0.001	643925766	13160966	2.0439	28	29.18
adapter_best	8	vtab-dmlab	sup_vith14_imagenet21k	0.005	0.001	643925766	13160966	2.0439	28	28.19
adapter_best	8	vtab-dmlab	sup_vith14_imagenet21k	0.005	0.001	643925766	13160966	2.0439	28	30.16
adapter_best	256	vtab-dmlab	sup_vitb16_imagenet21k	0.005	0.01	85867818	69162	0.0805	128	31.36
adapter_best	256	vtab-dmlab	sup_vitb16_imagenet21k	0.005	0.01	85867818	69162	0.0805	128	30.66
adapter_best	256	vtab-dmlab	sup_vitb16_imagenet21k	0.005	0.01	85867818	69162	0.0805	128	31.69
adapter_best	64	vtab-dsprites(predicted_attribute="label_x_position",num_classes=16)	sup_vitb16_imagenet21k	0.005	0.0001	86041504	242848	0.2822	128	30.03
adapter_best	64	vtab-dsprites(predicted_attribute="label_x_position",num_classes=16)	sup_vitb16_imagenet21k	0.005	0.0001	86041504	242848	0.2822	128	32.79
adapter_best	64	vtab-dsprites(predicted_attribute="label_x_position",num_classes=16)	sup_vitb16_imagenet21k	0.005	0.0001	86041504	242848	0.2822	128	32.88
adapter_best	8	vtab-dsprites(predicted_attribute="label_x_position",num_classes=16)	sup_vith14_imagenet21k	0.005	0.01	643938576	13173776	2.0458	28	10.45
adapter_best	8	vtab-dsprites(predicted_attribute="label_x_position",num_classes=16)	sup_vith14_imagenet21k	0.005	0.01	643938576	13173776	2.0458	28	10.03
adapter_best	8	vtab-dsprites(predicted_attribute="label_x_position",num_classes=16)	sup_vith14_imagenet21k	0.005	0.01	643938576	13173776	2.0458	28	9.55
adapter_best	8	vtab-dsprites(predicted_attribute="label_x_position",num_classes=16)	sup_vitl16_imagenet21k	0.005	0.0001	309637136	6335504	2.0461	64	36.37
adapter_best	8	vtab-dsprites(predicted_attribute="label_x_position",num_classes=16)	sup_vitl16_imagenet21k	0.005	0.0001	309637136	6335504	2.0461	64	29
adapter_best	8	vtab-dsprites(predicted_attribute="label_x_position",num_classes=16)	sup_vitl16_imagenet21k	0.005	0.0001	309637136	6335504	2.0461	64	25.92
adapter_best	8	vtab-oxford_flowers102	sup_vitb16_imagenet21k	0.005	0.01	87656934	1858278	2.1199	128	97.67
adapter_best	8	vtab-oxford_flowers102	sup_vitb16_imagenet21k	0.005	0.01	87656934	1858278	2.1199	128	97.84
adapter_best	8	vtab-oxford_flowers102	sup_vitb16_imagenet21k	0.005	0.01	87656934	1858278	2.1199	128	97.8
adapter_best	8	vtab-oxford_flowers102	sup_vith14_imagenet21k	0.005	0.01	644048742	13283942	2.0626	28	97.17
adapter_best	8	vtab-oxford_flowers102	sup_vith14_imagenet21k	0.005	0.01	644048742	13283942	2.0626	28	97.12
adapter_best	8	vtab-oxford_flowers102	sup_vith14_imagenet21k	0.005	0.01	644048742	13283942	2.0626	28	97.19
adapter_best	64	vtab-oxford_flowers102	sup_vitl16_imagenet21k	0.005	0.0001	304217574	915942	0.3011	64	97.48
adapter_best	64	vtab-oxford_flowers102	sup_vitl16_imagenet21k	0.005	0.0001	304217574	915942	0.3011	64	97.63
adapter_best	64	vtab-oxford_flowers102	sup_vitl16_imagenet21k	0.005	0.0001	304217574	915942	0.3011	64	96.99
adapter_best	64	vtab-eurosat	sup_vitb16_imagenet21k	0.005	0.001	86036890	238234	0.2769	128	87.7
adapter_best	64	vtab-eurosat	sup_vitb16_imagenet21k	0.005	0.001	86036890	238234	0.2769	128	86.96
adapter_best	64	vtab-eurosat	sup_vitb16_imagenet21k	0.005	0.001	86036890	238234	0.2769	128	87.78
adapter_best	64	vtab-eurosat	sup_vith14_imagenet21k	0.005	0.001	632457610	1692810	0.2677	28	86.35
adapter_best	64	vtab-eurosat	sup_vith14_imagenet21k	0.005	0.001	632457610	1692810	0.2677	28	86.69
adapter_best	64	vtab-eurosat	sup_vith14_imagenet21k	0.005	0.001	632457610	1692810	0.2677	28	86.69
adapter_best	64	vtab-eurosat	sup_vitl16_imagenet21k	0.005	0.01	304123274	821642	0.2702	64	83.56
adapter_best	64	vtab-eurosat	sup_vitl16_imagenet21k	0.005	0.01	304123274	821642	0.2702	64	86.31
adapter_best	64	vtab-eurosat	sup_vitl16_imagenet21k	0.005	0.01	304123274	821642	0.2702	64	85.37
adapter_best	256	vtab-dtd	sup_vith14_imagenet21k	0.005	0.001	631275727	510927	0.0809	28	63.09
adapter_best	256	vtab-dtd	sup_vith14_imagenet21k	0.005	0.001	631275727	510927	0.0809	28	62.45
adapter_best	256	vtab-dtd	sup_vith14_imagenet21k	0.005	0.001	631275727	510927	0.0809	28	62.55
adapter_best	64	vtab-dtd	sup_vitb16_imagenet21k	0.005	0.0001	86065343	266687	0.3099	128	62.82
adapter_best	64	vtab-dtd	sup_vitb16_imagenet21k	0.005	0.0001	86065343	266687	0.3099	128	62.29
adapter_best	64	vtab-dtd	sup_vitb16_imagenet21k	0.005	0.0001	86065343	266687	0.3099	128	62.98
adapter_best	64	vtab-dtd	sup_vitl16_imagenet21k	0.005	0.01	304161199	859567	0.2826	64	54.2
adapter_best	64	vtab-dtd	sup_vitl16_imagenet21k	0.005	0.01	304161199	859567	0.2826	64	54.47
adapter_best	64	vtab-dtd	sup_vitl16_imagenet21k	0.005	0.01	304161199	859567	0.2826	64	54.79
adapter_best	8	vtab-oxford_iiit_pet	sup_vitb16_imagenet21k	0.005	0.001	87606949	1808293	2.0641	128	87.54
adapter_best	8	vtab-oxford_iiit_pet	sup_vitb16_imagenet21k	0.005	0.001	87606949	1808293	2.0641	128	86.92
adapter_best	8	vtab-oxford_iiit_pet	sup_vitb16_imagenet21k	0.005	0.001	87606949	1808293	2.0641	128	87.16
adapter_best	64	vtab-oxford_iiit_pet	sup_vith14_imagenet21k	0.005	0.01	632492197	1727397	0.2731	28	84.08
adapter_best	64	vtab-oxford_iiit_pet	sup_vith14_imagenet21k	0.005	0.01	632492197	1727397	0.2731	28	84.08
adapter_best	64	vtab-oxford_iiit_pet	sup_vith14_imagenet21k	0.005	0.01	632492197	1727397	0.2731	28	84.46
adapter_best	256	vtab-oxford_iiit_pet	sup_vitl16_imagenet21k	0.005	0.0001	303560837	259205	0.0854	64	84.38
adapter_best	256	vtab-oxford_iiit_pet	sup_vitl16_imagenet21k	0.005	0.0001	303560837	259205	0.0854	64	84.74
adapter_best	256	vtab-oxford_iiit_pet	sup_vitl16_imagenet21k	0.005	0.0001	303560837	259205	0.0854	64	83.73
adapter_best	256	vtab-clevr(task="closest_object_distance")	sup_vitl16_imagenet21k	0.005	0.01	303529062	227430	0.0749	64	39.81
adapter_best	256	vtab-clevr(task="closest_object_distance")	sup_vitl16_imagenet21k	0.005	0.01	303529062	227430	0.0749	64	31.63
adapter_best	256	vtab-clevr(task="closest_object_distance")	sup_vitl16_imagenet21k	0.005	0.01	303529062	227430	0.0749	64	30.89
adapter_best	8	vtab-clevr(task="closest_object_distance")	sup_vitb16_imagenet21k	0.005	0.0001	87583110	1784454	2.0374	128	41.13
adapter_best	8	vtab-clevr(task="closest_object_distance")	sup_vitb16_imagenet21k	0.005	0.0001	87583110	1784454	2.0374	128	39.85
adapter_best	8	vtab-clevr(task="closest_object_distance")	sup_vitb16_imagenet21k	0.005	0.0001	87583110	1784454	2.0374	128	44.37
adapter_best	64	vtab-clevr(task="closest_object_distance")	sup_vith14_imagenet21k	0.005	0.001	632452486	1687686	0.2668	28	27.33
adapter_best	64	vtab-clevr(task="closest_object_distance")	sup_vith14_imagenet21k	0.005	0.001	632452486	1687686	0.2668	28	27.73
adapter_best	64	vtab-clevr(task="closest_object_distance")	sup_vith14_imagenet21k	0.005	0.001	632452486	1687686	0.2668	28	27.46
linear		vtab-caltech101	imagenet22k_sup_rnx_base	0.5	0.0001	87671014	104550	0.1193	1024	88.66
linear		vtab-caltech101	imagenet22k_sup_rnx_base	0.5	0.0001	87671014	104550	0.1193	1024	87.67
linear		vtab-caltech101	imagenet22k_sup_rnx_base	0.5	0.0001	87671014	104550	0.1193	1024	88.26
linear		vtab-caltech101	imagenet_sup_rn50	0.1	0.01	23717030	208998	0.8812	2048	87.67
linear		vtab-caltech101	imagenet_sup_rn50	0.1	0.01	23717030	208998	0.8812	2048	87.89
linear		vtab-caltech101	imagenet_sup_rn50	0.1	0.01	23717030	208998	0.8812	2048	87.54
linear		vtab-caltech101	sup_vitb16_imagenet21k	0.05	0.001	85877094	78438	0.0913	2048	83.5
linear		vtab-caltech101	sup_vitb16_imagenet21k	0.05	0.001	85877094	78438	0.0913	2048	85.45
linear		vtab-caltech101	sup_vitb16_imagenet21k	0.05	0.001	85877094	78438	0.0913	2048	84.75
linear		vtab-caltech101	sup_vitb16_imagenet21k	2.5	0.001	85877094	78438	0.0913	2048	85.55
linear		vtab-caltech101	sup_vitb16_imagenet21k	2.5	0.001	85877094	78438	0.0913	2048	85.47
linear		vtab-caltech101	sup_vitb16_imagenet21k	2.5	0.001	85877094	78438	0.0913	2048	85.47
linear		vtab-caltech101	sup_vith14_imagenet21k	1	0	630895462	130662	0.0207	1024	83.32
linear		vtab-caltech101	sup_vith14_imagenet21k	1	0	630895462	130662	0.0207	1024	83.6
linear		vtab-caltech101	sup_vith14_imagenet21k	1	0	630895462	130662	0.0207	1024	83.89
linear		vtab-caltech101	sup_vitl16_imagenet21k	0.1	0.001	303406182	104550	0.0345	2048	86.49
linear		vtab-caltech101	sup_vitl16_imagenet21k	0.1	0.001	303406182	104550	0.0345	2048	86.29
linear		vtab-caltech101	sup_vitl16_imagenet21k	0.1	0.001	303406182	104550	0.0345	2048	86.46
linear		vtab-caltech101	swinb_imagenet22k_224	0.05	0.01	86847774	104550	0.1204	1024	90.32
linear		vtab-caltech101	swinb_imagenet22k_224	0.05	0.01	86847774	104550	0.1204	1024	89.56
linear		vtab-caltech101	swinb_imagenet22k_224	0.05	0.01	86847774	104550	0.1204	1024	90.7
linear		vtab-cifar(num_classes=100)	imagenet22k_sup_rnx_base	0.5	0.01	87668964	102500	0.1169	1024	65.3
linear		vtab-cifar(num_classes=100)	imagenet22k_sup_rnx_base	0.5	0.01	87668964	102500	0.1169	1024	65.32
linear		vtab-cifar(num_classes=100)	imagenet22k_sup_rnx_base	0.5	0.01	87668964	102500	0.1169	1024	65.27
linear		vtab-cifar(num_classes=100)	imagenet_sup_rn50	0.1	0.0001	23712932	204900	0.8641	2048	45.67
linear		vtab-cifar(num_classes=100)	imagenet_sup_rn50	0.1	0.0001	23712932	204900	0.8641	2048	46.42
linear		vtab-cifar(num_classes=100)	imagenet_sup_rn50	0.1	0.0001	23712932	204900	0.8641	2048	46.07
linear		vtab-cifar(num_classes=100)	sup_vitb16_imagenet21k	0.1	0	85875556	76900	0.0895	2048	63.48
linear		vtab-cifar(num_classes=100)	sup_vitb16_imagenet21k	0.1	0	85875556	76900	0.0895	2048	63.08
linear		vtab-cifar(num_classes=100)	sup_vitb16_imagenet21k	0.1	0	85875556	76900	0.0895	2048	63.51
linear		vtab-cifar(num_classes=100)	sup_vith14_imagenet21k	1	0.001	630892900	128100	0.0203	1024	64.43
linear		vtab-cifar(num_classes=100)	sup_vith14_imagenet21k	1	0.001	630892900	128100	0.0203	1024	64.01
linear		vtab-cifar(num_classes=100)	sup_vith14_imagenet21k	1	0.001	630892900	128100	0.0203	1024	64.31
linear		vtab-cifar(num_classes=100)	sup_vitl16_imagenet21k	10	0	303404132	102500	0.0338	2048	72.24
linear		vtab-cifar(num_classes=100)	sup_vitl16_imagenet21k	10	0	303404132	102500	0.0338	2048	72.01
linear		vtab-cifar(num_classes=100)	sup_vitl16_imagenet21k	10	0	303404132	102500	0.0338	2048	72.28
linear		vtab-cifar(num_classes=100)	swinb_imagenet22k_224	0.1	0.01	86845724	102500	0.118	1024	61.52
linear		vtab-cifar(num_classes=100)	swinb_imagenet22k_224	0.1	0.01	86845724	102500	0.118	1024	61.62
linear		vtab-cifar(num_classes=100)	swinb_imagenet22k_224	0.1	0.01	86845724	102500	0.118	1024	61.09
linear		vtab-clevr(task="closest_object_distance")	imagenet22k_sup_rnx_base	0.1	0.0001	87572614	6150	0.007	1024	37.98
linear		vtab-clevr(task="closest_object_distance")	imagenet22k_sup_rnx_base	0.1	0.0001	87572614	6150	0.007	1024	37.91
linear		vtab-clevr(task="closest_object_distance")	imagenet22k_sup_rnx_base	0.1	0.0001	87572614	6150	0.007	1024	38.16
linear		vtab-clevr(task="closest_object_distance")	imagenet_sup_rn50	0.5	0.001	23520326	12294	0.0523	2048	32.33
linear		vtab-clevr(task="closest_object_distance")	imagenet_sup_rn50	0.5	0.001	23520326	12294	0.0523	2048	33.31
linear		vtab-clevr(task="closest_object_distance")	imagenet_sup_rn50	0.5	0.001	23520326	12294	0.0523	2048	31.9
linear		vtab-clevr(task="closest_object_distance")	sup_vitb16_imagenet21k	0.5	0.001	85803270	4614	0.0054	2048	30.17
linear		vtab-clevr(task="closest_object_distance")	sup_vitb16_imagenet21k	0.5	0.001	85803270	4614	0.0054	2048	30.93
linear		vtab-clevr(task="closest_object_distance")	sup_vitb16_imagenet21k	0.5	0.001	85803270	4614	0.0054	2048	30.57
linear		vtab-clevr(task="closest_object_distance")	sup_vith14_imagenet21k	25	0.0001	630772486	7686	0.0012	1024	19.97
linear		vtab-clevr(task="closest_object_distance")	sup_vith14_imagenet21k	25	0.0001	630772486	7686	0.0012	1024	29.11
linear		vtab-clevr(task="closest_object_distance")	sup_vith14_imagenet21k	25	0.0001	630772486	7686	0.0012	1024	24.35
linear		vtab-clevr(task="closest_object_distance")	sup_vitl16_imagenet21k	0.05	0.001	303307782	6150	0.002	2048	28.26
linear		vtab-clevr(task="closest_object_distance")	sup_vitl16_imagenet21k	0.05	0.001	303307782	6150	0.002	2048	28.84
linear		vtab-clevr(task="closest_object_distance")	sup_vitl16_imagenet21k	0.05	0.001	303307782	6150	0.002	2048	26.83
linear		vtab-clevr(task="closest_object_distance")	swinb_imagenet22k_224	0.1	0.01	86749374	6150	0.0071	1024	35.27
linear		vtab-clevr(task="closest_object_distance")	swinb_imagenet22k_224	0.1	0.01	86749374	6150	0.0071	1024	36.27
linear		vtab-clevr(task="closest_object_distance")	swinb_imagenet22k_224	0.1	0.01	86749374	6150	0.0071	1024	36.11
linear		vtab-clevr(task="count_all")	imagenet22k_sup_rnx_base	2.5	0.0001	87574664	8200	0.0094	1024	38.95
linear		vtab-clevr(task="count_all")	imagenet22k_sup_rnx_base	2.5	0.0001	87574664	8200	0.0094	1024	37.91
linear		vtab-clevr(task="count_all")	imagenet22k_sup_rnx_base	2.5	0.0001	87574664	8200	0.0094	1024	38.52
linear		vtab-clevr(task="count_all")	imagenet_sup_rn50	50	0	23524424	16392	0.0697	2048	34.43
linear		vtab-clevr(task="count_all")	imagenet_sup_rn50	50	0	23524424	16392	0.0697	2048	33.06
linear		vtab-clevr(task="count_all")	imagenet_sup_rn50	50	0	23524424	16392	0.0697	2048	34.37
linear		vtab-clevr(task="count_all")	sup_vitb16_imagenet21k	0.1	0	85804808	6152	0.0072	2048	34.57
linear		vtab-clevr(task="count_all")	sup_vitb16_imagenet21k	0.1	0	85804808	6152	0.0072	2048	34.3
linear		vtab-clevr(task="count_all")	sup_vitb16_imagenet21k	0.1	0	85804808	6152	0.0072	2048	34.06
linear		vtab-clevr(task="count_all")	sup_vith14_imagenet21k	0.5	0.0001	630775048	10248	0.0016	1024	16.26
linear		vtab-clevr(task="count_all")	sup_vith14_imagenet21k	0.5	0.0001	630775048	10248	0.0016	1024	30.11
linear		vtab-clevr(task="count_all")	sup_vith14_imagenet21k	0.5	0.0001	630775048	10248	0.0016	1024	30.47
linear		vtab-clevr(task="count_all")	sup_vitl16_imagenet21k	1	0	303309832	8200	0.0027	2048	28.79
linear		vtab-clevr(task="count_all")	sup_vitl16_imagenet21k	1	0	303309832	8200	0.0027	2048	27.1
linear		vtab-clevr(task="count_all")	sup_vitl16_imagenet21k	1	0	303309832	8200	0.0027	2048	28.81
linear		vtab-clevr(task="count_all")	swinb_imagenet22k_224	0.1	0.01	86751424	8200	0.0095	1024	38.59
linear		vtab-clevr(task="count_all")	swinb_imagenet22k_224	0.1	0.01	86751424	8200	0.0095	1024	39.88
linear		vtab-clevr(task="count_all")	swinb_imagenet22k_224	0.1	0.01	86751424	8200	0.0095	1024	38.68
linear		vtab-diabetic_retinopathy(config="btgraham-300")	imagenet22k_sup_rnx_base	10	0.001	87571589	5125	0.0059	1024	68.46
linear		vtab-diabetic_retinopathy(config="btgraham-300")	imagenet22k_sup_rnx_base	10	0.001	87571589	5125	0.0059	1024	64.85
linear		vtab-diabetic_retinopathy(config="btgraham-300")	imagenet22k_sup_rnx_base	10	0.001	87571589	5125	0.0059	1024	72.79
linear		vtab-diabetic_retinopathy(config="btgraham-300")	imagenet_sup_rn50	50	0.0001	23518277	10245	0.0436	2048	71.42
linear		vtab-diabetic_retinopathy(config="btgraham-300")	imagenet_sup_rn50	50	0.0001	23518277	10245	0.0436	2048	73.18
linear		vtab-diabetic_retinopathy(config="btgraham-300")	imagenet_sup_rn50	50	0.0001	23518277	10245	0.0436	2048	61.32
linear		vtab-diabetic_retinopathy(config="btgraham-300")	sup_vitb16_imagenet21k	0.05	0.01	85802501	3845	0.0045	2048	73.95
linear		vtab-diabetic_retinopathy(config="btgraham-300")	sup_vitb16_imagenet21k	0.05	0.01	85802501	3845	0.0045	2048	74
linear		vtab-diabetic_retinopathy(config="btgraham-300")	sup_vitb16_imagenet21k	0.05	0.01	85802501	3845	0.0045	2048	74.01
linear		vtab-diabetic_retinopathy(config="btgraham-300")	sup_vitb16_imagenet21k	0.1	0.01	85802501	3845	0.0045	2048	73.95
linear		vtab-diabetic_retinopathy(config="btgraham-300")	sup_vitb16_imagenet21k	0.1	0.01	85802501	3845	0.0045	2048	74.08
linear		vtab-diabetic_retinopathy(config="btgraham-300")	sup_vitb16_imagenet21k	0.1	0.01	85802501	3845	0.0045	2048	74.02
linear		vtab-diabetic_retinopathy(config="btgraham-300")	sup_vith14_imagenet21k	0.1	0.01	630771205	6405	0.001	1024	73.53
linear		vtab-diabetic_retinopathy(config="btgraham-300")	sup_vith14_imagenet21k	0.1	0.01	630771205	6405	0.001	1024	73.3
linear		vtab-diabetic_retinopathy(config="btgraham-300")	sup_vith14_imagenet21k	0.1	0.01	630771205	6405	0.001	1024	73.33
linear		vtab-diabetic_retinopathy(config="btgraham-300")	sup_vitl16_imagenet21k	25	0.001	303306757	5125	0.0017	2048	38.19
linear		vtab-diabetic_retinopathy(config="btgraham-300")	sup_vitl16_imagenet21k	25	0.001	303306757	5125	0.0017	2048	62.14
linear		vtab-diabetic_retinopathy(config="btgraham-300")	sup_vitl16_imagenet21k	25	0.001	303306757	5125	0.0017	2048	35.95
linear		vtab-diabetic_retinopathy(config="btgraham-300")	swinb_imagenet22k_224	0.5	0.01	86748349	5125	0.0059	1024	68.04
linear		vtab-diabetic_retinopathy(config="btgraham-300")	swinb_imagenet22k_224	0.5	0.01	86748349	5125	0.0059	1024	68.67
linear		vtab-diabetic_retinopathy(config="btgraham-300")	swinb_imagenet22k_224	0.5	0.01	86748349	5125	0.0059	1024	71.52
linear		vtab-dmlab	imagenet22k_sup_rnx_base	0.25	0.0001	87572614	6150	0.007	1024	39.6
linear		vtab-dmlab	imagenet22k_sup_rnx_base	0.25	0.0001	87572614	6150	0.007	1024	40.38
linear		vtab-dmlab	imagenet22k_sup_rnx_base	0.25	0.0001	87572614	6150	0.007	1024	40.48
linear		vtab-dmlab	imagenet_sup_rn50	50	0	23520326	12294	0.0523	2048	37.38
linear		vtab-dmlab	imagenet_sup_rn50	50	0	23520326	12294	0.0523	2048	36.49
linear		vtab-dmlab	imagenet_sup_rn50	50	0	23520326	12294	0.0523	2048	36.83
linear		vtab-dmlab	sup_vitb16_imagenet21k	0.5	0	85803270	4614	0.0054	2048	33.39
linear		vtab-dmlab	sup_vitb16_imagenet21k	0.5	0	85803270	4614	0.0054	2048	33.25
linear		vtab-dmlab	sup_vitb16_imagenet21k	0.5	0	85803270	4614	0.0054	2048	32.93
linear		vtab-dmlab	sup_vith14_imagenet21k	0.5	0.0001	630772486	7686	0.0012	1024	34.74
linear		vtab-dmlab	sup_vith14_imagenet21k	0.5	0.0001	630772486	7686	0.0012	1024	34.82
linear		vtab-dmlab	sup_vith14_imagenet21k	0.5	0.0001	630772486	7686	0.0012	1024	34.82
linear		vtab-dmlab	sup_vitl16_imagenet21k	0.1	0.01	303307782	6150	0.002	2048	34.26
linear		vtab-dmlab	sup_vitl16_imagenet21k	0.1	0.01	303307782	6150	0.002	2048	35.15
linear		vtab-dmlab	sup_vitl16_imagenet21k	0.1	0.01	303307782	6150	0.002	2048	34.65
linear		vtab-dmlab	swinb_imagenet22k_224	25	0.0001	86749374	6150	0.0071	1024	40.76
linear		vtab-dmlab	swinb_imagenet22k_224	25	0.0001	86749374	6150	0.0071	1024	39.64
linear		vtab-dmlab	swinb_imagenet22k_224	25	0.0001	86749374	6150	0.0071	1024	39.82
linear		vtab-dsprites(predicted_attribute="label_orientation",num_classes=16)	imagenet22k_sup_rnx_base	0.1	0	87582864	16400	0.0187	1024	34.09
linear		vtab-dsprites(predicted_attribute="label_orientation",num_classes=16)	imagenet22k_sup_rnx_base	0.1	0	87582864	16400	0.0187	1024	33.99
linear		vtab-dsprites(predicted_attribute="label_orientation",num_classes=16)	imagenet22k_sup_rnx_base	0.1	0	87582864	16400	0.0187	1024	33.92
linear		vtab-dsprites(predicted_attribute="label_orientation",num_classes=16)	imagenet_sup_rn50	1	0	23540816	32784	0.1393	2048	21.12
linear		vtab-dsprites(predicted_attribute="label_orientation",num_classes=16)	imagenet_sup_rn50	1	0	23540816	32784	0.1393	2048	21.69
linear		vtab-dsprites(predicted_attribute="label_orientation",num_classes=16)	imagenet_sup_rn50	1	0	23540816	32784	0.1393	2048	22.19
linear		vtab-dsprites(predicted_attribute="label_orientation",num_classes=16)	sup_vitb16_imagenet21k	0.1	0	85810960	12304	0.0143	2048	19.53
linear		vtab-dsprites(predicted_attribute="label_orientation",num_classes=16)	sup_vitb16_imagenet21k	0.1	0	85810960	12304	0.0143	2048	20.94
linear		vtab-dsprites(predicted_attribute="label_orientation",num_classes=16)	sup_vitb16_imagenet21k	0.1	0	85810960	12304	0.0143	2048	19.62
linear		vtab-dsprites(predicted_attribute="label_orientation",num_classes=16)	sup_vith14_imagenet21k	0.5	0.001	630785296	20496	0.0032	1024	16.68
linear		vtab-dsprites(predicted_attribute="label_orientation",num_classes=16)	sup_vith14_imagenet21k	0.5	0.001	630785296	20496	0.0032	1024	13.53
linear		vtab-dsprites(predicted_attribute="label_orientation",num_classes=16)	sup_vith14_imagenet21k	0.5	0.001	630785296	20496	0.0032	1024	16.66
linear		vtab-dsprites(predicted_attribute="label_orientation",num_classes=16)	sup_vitl16_imagenet21k	25	0	303318032	16400	0.0054	2048	13.92
linear		vtab-dsprites(predicted_attribute="label_orientation",num_classes=16)	sup_vitl16_imagenet21k	25	0	303318032	16400	0.0054	2048	13.59
linear		vtab-dsprites(predicted_attribute="label_orientation",num_classes=16)	sup_vitl16_imagenet21k	25	0	303318032	16400	0.0054	2048	14.95
linear		vtab-dsprites(predicted_attribute="label_orientation",num_classes=16)	swinb_imagenet22k_224	0.25	0.001	86759624	16400	0.0189	1024	26.21
linear		vtab-dsprites(predicted_attribute="label_orientation",num_classes=16)	swinb_imagenet22k_224	0.25	0.001	86759624	16400	0.0189	1024	25.63
linear		vtab-dsprites(predicted_attribute="label_orientation",num_classes=16)	swinb_imagenet22k_224	0.25	0.001	86759624	16400	0.0189	1024	26.11
linear		vtab-dsprites(predicted_attribute="label_x_position",num_classes=16)	imagenet22k_sup_rnx_base	0.25	0.0001	87582864	16400	0.0187	1024	17.32
linear		vtab-dsprites(predicted_attribute="label_x_position",num_classes=16)	imagenet22k_sup_rnx_base	0.25	0.0001	87582864	16400	0.0187	1024	16.96
linear		vtab-dsprites(predicted_attribute="label_x_position",num_classes=16)	imagenet22k_sup_rnx_base	0.25	0.0001	87582864	16400	0.0187	1024	17.62
linear		vtab-dsprites(predicted_attribute="label_x_position",num_classes=16)	imagenet_sup_rn50	1	0	23540816	32784	0.1393	2048	20.66
linear		vtab-dsprites(predicted_attribute="label_x_position",num_classes=16)	imagenet_sup_rn50	1	0	23540816	32784	0.1393	2048	21.31
linear		vtab-dsprites(predicted_attribute="label_x_position",num_classes=16)	imagenet_sup_rn50	1	0	23540816	32784	0.1393	2048	20.58
linear		vtab-dsprites(predicted_attribute="label_x_position",num_classes=16)	sup_vitb16_imagenet21k	5	0	85810960	12304	0.0143	2048	12.92
linear		vtab-dsprites(predicted_attribute="label_x_position",num_classes=16)	sup_vitb16_imagenet21k	5	0	85810960	12304	0.0143	2048	11.46
linear		vtab-dsprites(predicted_attribute="label_x_position",num_classes=16)	sup_vitb16_imagenet21k	5	0	85810960	12304	0.0143	2048	13.19
linear		vtab-dsprites(predicted_attribute="label_x_position",num_classes=16)	sup_vith14_imagenet21k	0.25	0	630785296	20496	0.0032	1024	8.89
linear		vtab-dsprites(predicted_attribute="label_x_position",num_classes=16)	sup_vith14_imagenet21k	0.25	0	630785296	20496	0.0032	1024	10.12
linear		vtab-dsprites(predicted_attribute="label_x_position",num_classes=16)	sup_vith14_imagenet21k	0.25	0	630785296	20496	0.0032	1024	9.55
linear		vtab-dsprites(predicted_attribute="label_x_position",num_classes=16)	sup_vitl16_imagenet21k	0.25	0	303318032	16400	0.0054	2048	11.83
linear		vtab-dsprites(predicted_attribute="label_x_position",num_classes=16)	sup_vitl16_imagenet21k	0.25	0	303318032	16400	0.0054	2048	10.37
linear		vtab-dsprites(predicted_attribute="label_x_position",num_classes=16)	sup_vitl16_imagenet21k	0.25	0	303318032	16400	0.0054	2048	9.54
linear		vtab-dsprites(predicted_attribute="label_x_position",num_classes=16)	swinb_imagenet22k_224	5	0	86759624	16400	0.0189	1024	20.81
linear		vtab-dsprites(predicted_attribute="label_x_position",num_classes=16)	swinb_imagenet22k_224	5	0	86759624	16400	0.0189	1024	19.73
linear		vtab-dsprites(predicted_attribute="label_x_position",num_classes=16)	swinb_imagenet22k_224	5	0	86759624	16400	0.0189	1024	20.45
linear		vtab-dtd	imagenet22k_sup_rnx_base	0.1	0.01	87614639	48175	0.055	1024	76.33
linear		vtab-dtd	imagenet22k_sup_rnx_base	0.1	0.01	87614639	48175	0.055	1024	76.01
linear		vtab-dtd	imagenet22k_sup_rnx_base	0.1	0.01	87614639	48175	0.055	1024	75.64
linear		vtab-dtd	imagenet_sup_rn50	0.1	0.01	23604335	96303	0.408	2048	64.79
linear		vtab-dtd	imagenet_sup_rn50	0.1	0.01	23604335	96303	0.408	2048	64.26
linear		vtab-dtd	imagenet_sup_rn50	0.1	0.01	23604335	96303	0.408	2048	64.15
linear		vtab-dtd	sup_vitb16_imagenet21k	1	0	85834799	36143	0.0421	2048	63.19
linear		vtab-dtd	sup_vitb16_imagenet21k	1	0	85834799	36143	0.0421	2048	62.93
linear		vtab-dtd	sup_vitb16_imagenet21k	1	0	85834799	36143	0.0421	2048	63.51
linear		vtab-dtd	sup_vith14_imagenet21k	2.5	0.001	630825007	60207	0.0095	1024	65.05
linear		vtab-dtd	sup_vith14_imagenet21k	2.5	0.001	630825007	60207	0.0095	1024	65.32
linear		vtab-dtd	sup_vith14_imagenet21k	2.5	0.001	630825007	60207	0.0095	1024	65.32
linear		vtab-dtd	sup_vitl16_imagenet21k	0.5	0	303349807	48175	0.0159	2048	63.56
linear		vtab-dtd	sup_vitl16_imagenet21k	0.5	0	303349807	48175	0.0159	2048	64.89
linear		vtab-dtd	sup_vitl16_imagenet21k	0.5	0	303349807	48175	0.0159	2048	62.29
linear		vtab-dtd	swinb_imagenet22k_224	2.5	0.01	86791399	48175	0.0555	1024	75.27
linear		vtab-dtd	swinb_imagenet22k_224	2.5	0.01	86791399	48175	0.0555	1024	73.62
linear		vtab-dtd	swinb_imagenet22k_224	2.5	0.01	86791399	48175	0.0555	1024	75.53
linear		vtab-eurosat	imagenet22k_sup_rnx_base	0.5	0.01	87576714	10250	0.0117	1024	92.11
linear		vtab-eurosat	imagenet22k_sup_rnx_base	0.5	0.01	87576714	10250	0.0117	1024	92.56
linear		vtab-eurosat	imagenet22k_sup_rnx_base	0.5	0.01	87576714	10250	0.0117	1024	92.22
linear		vtab-eurosat	imagenet_sup_rn50	1	0.001	23528522	20490	0.0871	2048	91.06
linear		vtab-eurosat	imagenet_sup_rn50	1	0.001	23528522	20490	0.0871	2048	90.26
linear		vtab-eurosat	imagenet_sup_rn50	1	0.001	23528522	20490	0.0871	2048	90.7
linear		vtab-eurosat	sup_vitb16_imagenet21k	10	0.0001	85806346	7690	0.009	2048	86.63
linear		vtab-eurosat	sup_vitb16_imagenet21k	10	0.0001	85806346	7690	0.009	2048	86.67
linear		vtab-eurosat	sup_vitb16_imagenet21k	10	0.0001	85806346	7690	0.009	2048	89.19
linear		vtab-eurosat	sup_vith14_imagenet21k	5	0.001	630777610	12810	0.002	1024	89.7
linear		vtab-eurosat	sup_vith14_imagenet21k	5	0.001	630777610	12810	0.002	1024	90.85
linear		vtab-eurosat	sup_vith14_imagenet21k	5	0.001	630777610	12810	0.002	1024	91.06
linear		vtab-eurosat	sup_vitl16_imagenet21k	1	0.0001	303311882	10250	0.0034	2048	86.98
linear		vtab-eurosat	sup_vitl16_imagenet21k	1	0.0001	303311882	10250	0.0034	2048	87.83
linear		vtab-eurosat	sup_vitl16_imagenet21k	1	0.0001	303311882	10250	0.0034	2048	87.04
linear		vtab-eurosat	swinb_imagenet22k_224	0.1	0.001	86753474	10250	0.0118	1024	89.54
linear		vtab-eurosat	swinb_imagenet22k_224	0.1	0.001	86753474	10250	0.0118	1024	90.39
linear		vtab-eurosat	swinb_imagenet22k_224	0.1	0.001	86753474	10250	0.0118	1024	90.35
linear		vtab-kitti(task="closest_vehicle_distance")	imagenet22k_sup_rnx_base	50	0.0001	87570564	4100	0.0047	1024	63.85
linear		vtab-kitti(task="closest_vehicle_distance")	imagenet22k_sup_rnx_base	50	0.0001	87570564	4100	0.0047	1024	65.54
linear		vtab-kitti(task="closest_vehicle_distance")	imagenet22k_sup_rnx_base	50	0.0001	87570564	4100	0.0047	1024	66.1
linear		vtab-kitti(task="closest_vehicle_distance")	imagenet_sup_rn50	25	0.0001	23516228	8196	0.0349	2048	60.62
linear		vtab-kitti(task="closest_vehicle_distance")	imagenet_sup_rn50	25	0.0001	23516228	8196	0.0349	2048	59.49
linear		vtab-kitti(task="closest_vehicle_distance")	imagenet_sup_rn50	25	0.0001	23516228	8196	0.0349	2048	66.95
linear		vtab-kitti(task="closest_vehicle_distance")	sup_vitb16_imagenet21k	5	0	85801732	3076	0.0036	2048	56.12
linear		vtab-kitti(task="closest_vehicle_distance")	sup_vitb16_imagenet21k	5	0	85801732	3076	0.0036	2048	53.31
linear		vtab-kitti(task="closest_vehicle_distance")	sup_vitb16_imagenet21k	5	0	85801732	3076	0.0036	2048	56.68
linear		vtab-kitti(task="closest_vehicle_distance")	sup_vith14_imagenet21k	25	0.0001	630769924	5124	0.0008	1024	57.24
linear		vtab-kitti(task="closest_vehicle_distance")	sup_vith14_imagenet21k	25	0.0001	630769924	5124	0.0008	1024	59.49
linear		vtab-kitti(task="closest_vehicle_distance")	sup_vith14_imagenet21k	25	0.0001	630769924	5124	0.0008	1024	60.2
linear		vtab-kitti(task="closest_vehicle_distance")	sup_vitl16_imagenet21k	2.5	0.001	303305732	4100	0.0014	2048	52.18
linear		vtab-kitti(task="closest_vehicle_distance")	sup_vitl16_imagenet21k	2.5	0.001	303305732	4100	0.0014	2048	54.85
linear		vtab-kitti(task="closest_vehicle_distance")	sup_vitl16_imagenet21k	2.5	0.001	303305732	4100	0.0014	2048	54.99
linear		vtab-kitti(task="closest_vehicle_distance")	swinb_imagenet22k_224	10	0.001	86747324	4100	0.0047	1024	66.39
linear		vtab-kitti(task="closest_vehicle_distance")	swinb_imagenet22k_224	10	0.001	86747324	4100	0.0047	1024	61.74
linear		vtab-kitti(task="closest_vehicle_distance")	swinb_imagenet22k_224	10	0.001	86747324	4100	0.0047	1024	66.95
linear		vtab-oxford_flowers102	imagenet22k_sup_rnx_base	0.05	0.01	87671014	104550	0.1193	1024	99.48
linear		vtab-oxford_flowers102	imagenet22k_sup_rnx_base	0.05	0.01	87671014	104550	0.1193	1024	99.64
linear		vtab-oxford_flowers102	imagenet22k_sup_rnx_base	0.05	0.01	87671014	104550	0.1193	1024	99.4
linear		vtab-oxford_flowers102	imagenet_sup_rn50	0.05	0.01	23717030	208998	0.8812	2048	81.25
linear		vtab-oxford_flowers102	imagenet_sup_rn50	0.05	0.01	23717030	208998	0.8812	2048	80.68
linear		vtab-oxford_flowers102	imagenet_sup_rn50	0.05	0.01	23717030	208998	0.8812	2048	80.97
linear		vtab-oxford_flowers102	sup_vitb16_imagenet21k	0.1	0.001	85877094	78438	0.0913	2048	97.02
linear		vtab-oxford_flowers102	sup_vitb16_imagenet21k	0.1	0.001	85877094	78438	0.0913	2048	96.99
linear		vtab-oxford_flowers102	sup_vitb16_imagenet21k	0.1	0.001	85877094	78438	0.0913	2048	97.02
linear		vtab-oxford_flowers102	sup_vith14_imagenet21k	0.25	0.001	630895462	130662	0.0207	1024	96.16
linear		vtab-oxford_flowers102	sup_vith14_imagenet21k	0.25	0.001	630895462	130662	0.0207	1024	96.24
linear		vtab-oxford_flowers102	sup_vith14_imagenet21k	0.25	0.001	630895462	130662	0.0207	1024	96.16
linear		vtab-oxford_flowers102	sup_vitl16_imagenet21k	0.1	0.01	303406182	104550	0.0345	2048	97.33
linear		vtab-oxford_flowers102	sup_vitl16_imagenet21k	0.1	0.01	303406182	104550	0.0345	2048	97.27
linear		vtab-oxford_flowers102	sup_vitl16_imagenet21k	0.1	0.01	303406182	104550	0.0345	2048	97.45
linear		vtab-oxford_flowers102	swinb_imagenet22k_224	1	0.01	86847774	104550	0.1204	1024	99.5
linear		vtab-oxford_flowers102	swinb_imagenet22k_224	1	0.01	86847774	104550	0.1204	1024	99.53
linear		vtab-oxford_flowers102	swinb_imagenet22k_224	1	0.01	86847774	104550	0.1204	1024	99.51
linear		vtab-oxford_iiit_pet	imagenet22k_sup_rnx_base	0.5	0.001	87604389	37925	0.0433	1024	90.62
linear		vtab-oxford_iiit_pet	imagenet22k_sup_rnx_base	0.5	0.001	87604389	37925	0.0433	1024	89.75
linear		vtab-oxford_iiit_pet	imagenet22k_sup_rnx_base	0.5	0.001	87604389	37925	0.0433	1024	91.25
linear		vtab-oxford_iiit_pet	imagenet_sup_rn50	0.05	0.0001	23583845	75813	0.3215	2048	87.11
linear		vtab-oxford_iiit_pet	imagenet_sup_rn50	0.05	0.0001	23583845	75813	0.3215	2048	87.27
linear		vtab-oxford_iiit_pet	imagenet_sup_rn50	0.05	0.0001	23583845	75813	0.3215	2048	86.81
linear		vtab-oxford_iiit_pet	sup_vitb16_imagenet21k	0.25	0.001	85827109	28453	0.0332	2048	86.26
linear		vtab-oxford_iiit_pet	sup_vitb16_imagenet21k	0.25	0.001	85827109	28453	0.0332	2048	86.24
linear		vtab-oxford_iiit_pet	sup_vitb16_imagenet21k	0.25	0.001	85827109	28453	0.0332	2048	86.32
linear		vtab-oxford_iiit_pet	sup_vith14_imagenet21k	0.25	0.01	630812197	47397	0.0075	1024	83.57
linear		vtab-oxford_iiit_pet	sup_vith14_imagenet21k	0.25	0.01	630812197	47397	0.0075	1024	83.16
linear		vtab-oxford_iiit_pet	sup_vith14_imagenet21k	0.25	0.01	630812197	47397	0.0075	1024	83.89
linear		vtab-oxford_iiit_pet	sup_vitl16_imagenet21k	0.1	0.01	303339557	37925	0.0125	2048	85.85
linear		vtab-oxford_iiit_pet	sup_vitl16_imagenet21k	0.1	0.01	303339557	37925	0.0125	2048	85.53
linear		vtab-oxford_iiit_pet	sup_vitl16_imagenet21k	0.1	0.01	303339557	37925	0.0125	2048	85.91
linear		vtab-oxford_iiit_pet	swinb_imagenet22k_224	0.1	0.01	86781149	37925	0.0437	1024	90.16
linear		vtab-oxford_iiit_pet	swinb_imagenet22k_224	0.1	0.01	86781149	37925	0.0437	1024	90.43
linear		vtab-oxford_iiit_pet	swinb_imagenet22k_224	0.1	0.01	86781149	37925	0.0437	1024	89.94
linear		vtab-patch_camelyon	imagenet22k_sup_rnx_base	0.5	0.01	87568514	2050	0.0023	1024	83.22
linear		vtab-patch_camelyon	imagenet22k_sup_rnx_base	0.5	0.01	87568514	2050	0.0023	1024	82.6
linear		vtab-patch_camelyon	imagenet22k_sup_rnx_base	0.5	0.01	87568514	2050	0.0023	1024	83.92
linear		vtab-patch_camelyon	imagenet_sup_rn50	5	0.001	23512130	4098	0.0174	2048	80.78
linear		vtab-patch_camelyon	imagenet_sup_rn50	5	0.001	23512130	4098	0.0174	2048	81.1
linear		vtab-patch_camelyon	imagenet_sup_rn50	5	0.001	23512130	4098	0.0174	2048	80.29
linear		vtab-patch_camelyon	sup_vitb16_imagenet21k	0.05	0.01	85800194	1538	0.0018	2048	78.75
linear		vtab-patch_camelyon	sup_vitb16_imagenet21k	0.05	0.01	85800194	1538	0.0018	2048	77.99
linear		vtab-patch_camelyon	sup_vitb16_imagenet21k	0.05	0.01	85800194	1538	0.0018	2048	78.82
linear		vtab-patch_camelyon	sup_vith14_imagenet21k	50	0.0001	630767362	2562	0.0004	1024	77.28
linear		vtab-patch_camelyon	sup_vith14_imagenet21k	50	0.0001	630767362	2562	0.0004	1024	76.82
linear		vtab-patch_camelyon	sup_vith14_imagenet21k	50	0.0001	630767362	2562	0.0004	1024	80.02
linear		vtab-patch_camelyon	sup_vitl16_imagenet21k	0.1	0.0001	303303682	2050	0.0007	2048	76.73
linear		vtab-patch_camelyon	sup_vitl16_imagenet21k	0.1	0.0001	303303682	2050	0.0007	2048	76.64
linear		vtab-patch_camelyon	sup_vitl16_imagenet21k	0.1	0.0001	303303682	2050	0.0007	2048	76.98
linear		vtab-patch_camelyon	swinb_imagenet22k_224	0.05	0.01	86745274	2050	0.0024	1024	82.33
linear		vtab-patch_camelyon	swinb_imagenet22k_224	0.05	0.01	86745274	2050	0.0024	1024	81.87
linear		vtab-patch_camelyon	swinb_imagenet22k_224	0.05	0.01	86745274	2050	0.0024	1024	80.18
linear		vtab-resisc45	imagenet22k_sup_rnx_base	0.1	0.01	87612589	46125	0.0526	1024	81.79
linear		vtab-resisc45	imagenet22k_sup_rnx_base	0.1	0.01	87612589	46125	0.0526	1024	81.68
linear		vtab-resisc45	imagenet22k_sup_rnx_base	0.1	0.01	87612589	46125	0.0526	1024	81.71
linear		vtab-resisc45	imagenet_sup_rn50	5	0.0001	23600237	92205	0.3907	2048	69.21
linear		vtab-resisc45	imagenet_sup_rn50	5	0.0001	23600237	92205	0.3907	2048	71.03
linear		vtab-resisc45	imagenet_sup_rn50	5	0.0001	23600237	92205	0.3907	2048	70.84
linear		vtab-resisc45	sup_vitb16_imagenet21k	0.1	0.001	85833261	34605	0.0403	2048	68.71
linear		vtab-resisc45	sup_vitb16_imagenet21k	0.1	0.001	85833261	34605	0.0403	2048	68.51
linear		vtab-resisc45	sup_vitb16_imagenet21k	0.1	0.001	85833261	34605	0.0403	2048	68.43
linear		vtab-resisc45	sup_vitb16_imagenet21k	0.5	0	85833261	34605	0.0403	2048	68.6
linear		vtab-resisc45	sup_vitb16_imagenet21k	0.5	0	85833261	34605	0.0403	2048	69.16
linear		vtab-resisc45	sup_vitb16_imagenet21k	0.5	0	85833261	34605	0.0403	2048	68.4
linear		vtab-resisc45	sup_vith14_imagenet21k	2.5	0.001	630822445	57645	0.0091	1024	73.92
linear		vtab-resisc45	sup_vith14_imagenet21k	2.5	0.001	630822445	57645	0.0091	1024	73.73
linear		vtab-resisc45	sup_vith14_imagenet21k	2.5	0.001	630822445	57645	0.0091	1024	73.94
linear		vtab-resisc45	sup_vitl16_imagenet21k	0.5	0.0001	303347757	46125	0.0152	2048	66.7
linear		vtab-resisc45	sup_vitl16_imagenet21k	0.5	0.0001	303347757	46125	0.0152	2048	67.13
linear		vtab-resisc45	sup_vitl16_imagenet21k	0.5	0.0001	303347757	46125	0.0152	2048	66.08
linear		vtab-resisc45	swinb_imagenet22k_224	0.25	0.01	86789349	46125	0.0531	1024	82.22
linear		vtab-resisc45	swinb_imagenet22k_224	0.25	0.01	86789349	46125	0.0531	1024	82.14
linear		vtab-resisc45	swinb_imagenet22k_224	0.25	0.01	86789349	46125	0.0531	1024	82.03
linear		vtab-smallnorb(predicted_attribute="label_azimuth")	imagenet22k_sup_rnx_base	5	0.0001	87584914	18450	0.0211	1024	17.64
linear		vtab-smallnorb(predicted_attribute="label_azimuth")	imagenet22k_sup_rnx_base	5	0.0001	87584914	18450	0.0211	1024	17.79
linear		vtab-smallnorb(predicted_attribute="label_azimuth")	imagenet22k_sup_rnx_base	5	0.0001	87584914	18450	0.0211	1024	17.45
linear		vtab-smallnorb(predicted_attribute="label_azimuth")	imagenet_sup_rn50	0.25	0	23544914	36882	0.1566	2048	15.54
linear		vtab-smallnorb(predicted_attribute="label_azimuth")	imagenet_sup_rn50	0.25	0	23544914	36882	0.1566	2048	15.14
linear		vtab-smallnorb(predicted_attribute="label_azimuth")	imagenet_sup_rn50	0.25	0	23544914	36882	0.1566	2048	14.66
linear		vtab-smallnorb(predicted_attribute="label_azimuth")	imagenet_sup_rn50	5	0.0001	23544914	36882	0.1566	2048	14.61
linear		vtab-smallnorb(predicted_attribute="label_azimuth")	imagenet_sup_rn50	5	0.0001	23544914	36882	0.1566	2048	15.06
linear		vtab-smallnorb(predicted_attribute="label_azimuth")	imagenet_sup_rn50	5	0.0001	23544914	36882	0.1566	2048	14.61
linear		vtab-smallnorb(predicted_attribute="label_azimuth")	sup_vitb16_imagenet21k	2.5	0.01	85812498	13842	0.0161	2048	10.37
linear		vtab-smallnorb(predicted_attribute="label_azimuth")	sup_vitb16_imagenet21k	2.5	0.01	85812498	13842	0.0161	2048	9.75
linear		vtab-smallnorb(predicted_attribute="label_azimuth")	sup_vitb16_imagenet21k	2.5	0.01	85812498	13842	0.0161	2048	8.58
linear		vtab-smallnorb(predicted_attribute="label_azimuth")	sup_vith14_imagenet21k	2.5	0.0001	630787858	23058	0.0037	1024	17.7
linear		vtab-smallnorb(predicted_attribute="label_azimuth")	sup_vith14_imagenet21k	2.5	0.0001	630787858	23058	0.0037	1024	17.06
linear		vtab-smallnorb(predicted_attribute="label_azimuth")	sup_vith14_imagenet21k	2.5	0.0001	630787858	23058	0.0037	1024	17.37
linear		vtab-smallnorb(predicted_attribute="label_azimuth")	sup_vitl16_imagenet21k	0.25	0.0001	303320082	18450	0.0061	2048	14.53
linear		vtab-smallnorb(predicted_attribute="label_azimuth")	sup_vitl16_imagenet21k	0.25	0.0001	303320082	18450	0.0061	2048	14.59
linear		vtab-smallnorb(predicted_attribute="label_azimuth")	sup_vitl16_imagenet21k	0.25	0.0001	303320082	18450	0.0061	2048	14.6
linear		vtab-smallnorb(predicted_attribute="label_azimuth")	swinb_imagenet22k_224	0.05	0.0001	86761674	18450	0.0213	1024	14.34
linear		vtab-smallnorb(predicted_attribute="label_azimuth")	swinb_imagenet22k_224	0.05	0.0001	86761674	18450	0.0213	1024	14.71
linear		vtab-smallnorb(predicted_attribute="label_azimuth")	swinb_imagenet22k_224	0.05	0.0001	86761674	18450	0.0213	1024	13.86
linear		vtab-smallnorb(predicted_attribute="label_elevation")	imagenet22k_sup_rnx_base	1	0	87575689	9225	0.0105	1024	27.48
linear		vtab-smallnorb(predicted_attribute="label_elevation")	imagenet22k_sup_rnx_base	1	0	87575689	9225	0.0105	1024	27.4
linear		vtab-smallnorb(predicted_attribute="label_elevation")	imagenet22k_sup_rnx_base	1	0	87575689	9225	0.0105	1024	27.3
linear		vtab-smallnorb(predicted_attribute="label_elevation")	imagenet_sup_rn50	0.5	0.0001	23526473	18441	0.0784	2048	24
linear		vtab-smallnorb(predicted_attribute="label_elevation")	imagenet_sup_rn50	0.5	0.0001	23526473	18441	0.0784	2048	24.86
linear		vtab-smallnorb(predicted_attribute="label_elevation")	imagenet_sup_rn50	0.5	0.0001	23526473	18441	0.0784	2048	24.61
linear		vtab-smallnorb(predicted_attribute="label_elevation")	sup_vitb16_imagenet21k	2.5	0.01	85805577	6921	0.0081	2048	19.89
linear		vtab-smallnorb(predicted_attribute="label_elevation")	sup_vitb16_imagenet21k	2.5	0.01	85805577	6921	0.0081	2048	17.62
linear		vtab-smallnorb(predicted_attribute="label_elevation")	sup_vitb16_imagenet21k	2.5	0.01	85805577	6921	0.0081	2048	20.01
linear		vtab-smallnorb(predicted_attribute="label_elevation")	sup_vith14_imagenet21k	50	0	630776329	11529	0.0018	1024	22.67
linear		vtab-smallnorb(predicted_attribute="label_elevation")	sup_vith14_imagenet21k	50	0	630776329	11529	0.0018	1024	22.72
linear		vtab-smallnorb(predicted_attribute="label_elevation")	sup_vith14_imagenet21k	50	0	630776329	11529	0.0018	1024	22.99
linear		vtab-smallnorb(predicted_attribute="label_elevation")	sup_vitl16_imagenet21k	0.05	0.01	303310857	9225	0.003	2048	21.69
linear		vtab-smallnorb(predicted_attribute="label_elevation")	sup_vitl16_imagenet21k	0.05	0.01	303310857	9225	0.003	2048	21.82
linear		vtab-smallnorb(predicted_attribute="label_elevation")	sup_vitl16_imagenet21k	0.05	0.01	303310857	9225	0.003	2048	22.27
linear		vtab-smallnorb(predicted_attribute="label_elevation")	swinb_imagenet22k_224	0.25	0.001	86752449	9225	0.0106	1024	27.14
linear		vtab-smallnorb(predicted_attribute="label_elevation")	swinb_imagenet22k_224	0.25	0.001	86752449	9225	0.0106	1024	27.35
linear		vtab-smallnorb(predicted_attribute="label_elevation")	swinb_imagenet22k_224	0.25	0.001	86752449	9225	0.0106	1024	27.42
linear		vtab-smallnorb(predicted_attribute="label_elevation")	swinb_imagenet22k_224	10	0	86752449	9225	0.0106	1024	28.02
linear		vtab-smallnorb(predicted_attribute="label_elevation")	swinb_imagenet22k_224	10	0	86752449	9225	0.0106	1024	27.37
linear		vtab-smallnorb(predicted_attribute="label_elevation")	swinb_imagenet22k_224	10	0	86752449	9225	0.0106	1024	27.99
linear		vtab-sun397	imagenet22k_sup_rnx_base	2.5	0.0001	87973389	406925	0.4626	1024	52.71
linear		vtab-sun397	imagenet22k_sup_rnx_base	2.5	0.0001	87973389	406925	0.4626	1024	51.89
linear		vtab-sun397	imagenet22k_sup_rnx_base	2.5	0.0001	87973389	406925	0.4626	1024	52.38
linear		vtab-sun397	imagenet_sup_rn50	0.05	0.01	24321485	813453	3.3446	2048	35.42
linear		vtab-sun397	imagenet_sup_rn50	0.05	0.01	24321485	813453	3.3446	2048	35.42
linear		vtab-sun397	imagenet_sup_rn50	0.05	0.01	24321485	813453	3.3446	2048	35.46
linear		vtab-sun397	sup_vitb16_imagenet21k	0.5	0	86103949	305293	0.3546	2048	51.02
linear		vtab-sun397	sup_vitb16_imagenet21k	0.5	0	86103949	305293	0.3546	2048	51.04
linear		vtab-sun397	sup_vitb16_imagenet21k	0.5	0	86103949	305293	0.3546	2048	50.97
linear		vtab-sun397	sup_vith14_imagenet21k	1	0.0001	631273357	508557	0.0806	1024	44.76
linear		vtab-sun397	sup_vith14_imagenet21k	1	0.0001	631273357	508557	0.0806	1024	39.45
linear		vtab-sun397	sup_vith14_imagenet21k	1	0.0001	631273357	508557	0.0806	1024	44.77
linear		vtab-sun397	sup_vitl16_imagenet21k	0.1	0.001	303708557	406925	0.134	2048	52.6
linear		vtab-sun397	sup_vitl16_imagenet21k	0.1	0.001	303708557	406925	0.134	2048	52.59
linear		vtab-sun397	sup_vitl16_imagenet21k	0.1	0.001	303708557	406925	0.134	2048	52.4
linear		vtab-sun397	swinb_imagenet22k_224	0.1	0.01	87150149	406925	0.4669	1024	55.81
linear		vtab-sun397	swinb_imagenet22k_224	0.1	0.01	87150149	406925	0.4669	1024	55.8
linear		vtab-sun397	swinb_imagenet22k_224	0.1	0.01	87150149	406925	0.4669	1024	55.83
linear		vtab-svhn	imagenet22k_sup_rnx_base	1	0.0001	87576714	10250	0.0117	1024	49.23
linear		vtab-svhn	imagenet22k_sup_rnx_base	1	0.0001	87576714	10250	0.0117	1024	50
linear		vtab-svhn	imagenet22k_sup_rnx_base	1	0.0001	87576714	10250	0.0117	1024	49.2
linear		vtab-svhn	imagenet_sup_rn50	5	0	23528522	20490	0.0871	2048	44.95
linear		vtab-svhn	imagenet_sup_rn50	5	0	23528522	20490	0.0871	2048	43.78
linear		vtab-svhn	imagenet_sup_rn50	5	0	23528522	20490	0.0871	2048	45.27
linear		vtab-svhn	sup_vitb16_imagenet21k	0.25	0.01	85806346	7690	0.009	2048	36.6
linear		vtab-svhn	sup_vitb16_imagenet21k	0.25	0.01	85806346	7690	0.009	2048	36.59
linear		vtab-svhn	sup_vitb16_imagenet21k	0.25	0.01	85806346	7690	0.009	2048	36.65
linear		vtab-svhn	sup_vith14_imagenet21k	0.5	0.001	630777610	12810	0.002	1024	44.08
linear		vtab-svhn	sup_vith14_imagenet21k	0.5	0.001	630777610	12810	0.002	1024	31.45
linear		vtab-svhn	sup_vith14_imagenet21k	0.5	0.001	630777610	12810	0.002	1024	43.91
linear		vtab-svhn	sup_vitl16_imagenet21k	0.25	0	303311882	10250	0.0034	2048	38.46
linear		vtab-svhn	sup_vitl16_imagenet21k	0.25	0	303311882	10250	0.0034	2048	37.88
linear		vtab-svhn	sup_vitl16_imagenet21k	0.25	0	303311882	10250	0.0034	2048	37.9
linear		vtab-svhn	swinb_imagenet22k_224	0.1	0.001	86753474	10250	0.0118	1024	42.24
linear		vtab-svhn	swinb_imagenet22k_224	0.1	0.001	86753474	10250	0.0118	1024	43.53
linear		vtab-svhn	swinb_imagenet22k_224	0.1	0.001	86753474	10250	0.0118	1024	42.35
end2end		vtab-caltech101	imagenet22k_sup_rnx_base	0.001	0.0001	87671014	87671014	100	128	86.95
end2end		vtab-caltech101	imagenet22k_sup_rnx_base	0.001	0.0001	87671014	87671014	100	128	87.98
end2end		vtab-caltech101	imagenet22k_sup_rnx_base	0.001	0.0001	87671014	87671014	100	128	86.98
end2end		vtab-caltech101	imagenet_sup_rn50	0.005	0.0001	23717030	23717030	100	384	79.49
end2end		vtab-caltech101	imagenet_sup_rn50	0.005	0.0001	23717030	23717030	100	384	80.79
end2end		vtab-caltech101	imagenet_sup_rn50	0.005	0.0001	23717030	23717030	100	384	82.71
end2end		vtab-caltech101	sup_vitb16_imagenet21k	0.001	0.01	85877094	85877094	100	128	87.84
end2end		vtab-caltech101	sup_vitb16_imagenet21k	0.001	0.01	85877094	85877094	100	128	88.23
end2end		vtab-caltech101	sup_vitb16_imagenet21k	0.001	0.01	85877094	85877094	100	128	87.13
end2end		vtab-caltech101	sup_vith14_imagenet21k	0.005	0.0001	630895462	630895462	100	28	88.02
end2end		vtab-caltech101	sup_vith14_imagenet21k	0.005	0.0001	630895462	630895462	100	28	87.44
end2end		vtab-caltech101	sup_vith14_imagenet21k	0.005	0.0001	630895462	630895462	100	28	82.07
end2end		vtab-caltech101	sup_vith14_imagenet21k	0.005	0.01	630895462	630895462	100	28	87.66
end2end		vtab-caltech101	sup_vith14_imagenet21k	0.005	0.01	630895462	630895462	100	28	87.15
end2end		vtab-caltech101	sup_vitl16_imagenet21k	0.001	0.01	303406182	303406182	100	64	85.88
end2end		vtab-caltech101	sup_vitl16_imagenet21k	0.001	0.01	303406182	303406182	100	64	84.35
end2end		vtab-caltech101	sup_vitl16_imagenet21k	0.001	0.01	303406182	303406182	100	64	82.66
end2end		vtab-caltech101	swinb_imagenet22k_224	0.0001	0.001	86847774	86847774	100	128	88.86
end2end		vtab-caltech101	swinb_imagenet22k_224	0.0001	0.001	86847774	86847774	100	128	89.15
end2end		vtab-caltech101	swinb_imagenet22k_224	0.0001	0.001	86847774	86847774	100	128	86.01
end2end		vtab-cifar(num_classes=100)	imagenet22k_sup_rnx_base	0.001	0.01	87668964	87668964	100	128	68.77
end2end		vtab-cifar(num_classes=100)	imagenet22k_sup_rnx_base	0.001	0.01	87668964	87668964	100	128	69.71
end2end		vtab-cifar(num_classes=100)	imagenet22k_sup_rnx_base	0.001	0.01	87668964	87668964	100	128	67.84
end2end		vtab-cifar(num_classes=100)	imagenet_sup_rn50	0.005	0.001	23712932	23712932	100	384	32.6
end2end		vtab-cifar(num_classes=100)	imagenet_sup_rn50	0.005	0.001	23712932	23712932	100	384	33.61
end2end		vtab-cifar(num_classes=100)	imagenet_sup_rn50	0.005	0.001	23712932	23712932	100	384	32.44
end2end		vtab-cifar(num_classes=100)	sup_vitb16_imagenet21k	0.001	0.0001	85875556	85875556	100	128	69.39
end2end		vtab-cifar(num_classes=100)	sup_vitb16_imagenet21k	0.001	0.0001	85875556	85875556	100	128	67.66
end2end		vtab-cifar(num_classes=100)	sup_vitb16_imagenet21k	0.001	0.0001	85875556	85875556	100	128	69.63
end2end		vtab-cifar(num_classes=100)	sup_vith14_imagenet21k	0.005	0.01	630892900	630892900	100	28	61.02
end2end		vtab-cifar(num_classes=100)	sup_vith14_imagenet21k	0.005	0.01	630892900	630892900	100	28	53.11
end2end		vtab-cifar(num_classes=100)	sup_vith14_imagenet21k	0.005	0.01	630892900	630892900	100	28	61.81
end2end		vtab-cifar(num_classes=100)	sup_vitl16_imagenet21k	0.001	0.001	303404132	303404132	100	64	69.76
end2end		vtab-cifar(num_classes=100)	sup_vitl16_imagenet21k	0.001	0.001	303404132	303404132	100	64	68.75
end2end		vtab-cifar(num_classes=100)	sup_vitl16_imagenet21k	0.001	0.001	303404132	303404132	100	64	67.18
end2end		vtab-cifar(num_classes=100)	swinb_imagenet22k_224	0.0005	0.0001	86845724	86845724	100	128	72.59
end2end		vtab-cifar(num_classes=100)	swinb_imagenet22k_224	0.0005	0.0001	86845724	86845724	100	128	73.26
end2end		vtab-cifar(num_classes=100)	swinb_imagenet22k_224	0.0005	0.0001	86845724	86845724	100	128	70.64
end2end		vtab-clevr(task="closest_object_distance")	imagenet22k_sup_rnx_base	0.005	0.01	87572614	87572614	100	128	62.31
end2end		vtab-clevr(task="closest_object_distance")	imagenet22k_sup_rnx_base	0.005	0.01	87572614	87572614	100	128	60.42
end2end		vtab-clevr(task="closest_object_distance")	imagenet22k_sup_rnx_base	0.005	0.01	87572614	87572614	100	128	61.62
end2end		vtab-clevr(task="closest_object_distance")	imagenet_sup_rn50	0.025	0.001	23520326	23520326	100	384	63.33
end2end		vtab-clevr(task="closest_object_distance")	imagenet_sup_rn50	0.025	0.001	23520326	23520326	100	384	65.57
end2end		vtab-clevr(task="closest_object_distance")	imagenet_sup_rn50	0.025	0.001	23520326	23520326	100	384	60.34
end2end		vtab-clevr(task="closest_object_distance")	sup_vitb16_imagenet21k	0.001	0.0001	85803270	85803270	100	128	58.57
end2end		vtab-clevr(task="closest_object_distance")	sup_vitb16_imagenet21k	0.001	0.0001	85803270	85803270	100	128	58.7
end2end		vtab-clevr(task="closest_object_distance")	sup_vitb16_imagenet21k	0.001	0.0001	85803270	85803270	100	128	58.49
end2end		vtab-clevr(task="closest_object_distance")	sup_vith14_imagenet21k	0.005	0.01	630772486	630772486	100	28	52.43
end2end		vtab-clevr(task="closest_object_distance")	sup_vith14_imagenet21k	0.005	0.01	630772486	630772486	100	28	53.58
end2end		vtab-clevr(task="closest_object_distance")	sup_vith14_imagenet21k	0.005	0.01	630772486	630772486	100	28	55.8
end2end		vtab-clevr(task="closest_object_distance")	sup_vitl16_imagenet21k	0.0005	0.001	303307782	303307782	100	64	56.3
end2end		vtab-clevr(task="closest_object_distance")	sup_vitl16_imagenet21k	0.0005	0.001	303307782	303307782	100	64	55.73
end2end		vtab-clevr(task="closest_object_distance")	sup_vitl16_imagenet21k	0.0005	0.001	303307782	303307782	100	64	52.81
end2end		vtab-clevr(task="closest_object_distance")	swinb_imagenet22k_224	0.0001	0.0001	86749374	86749374	100	128	61.71
end2end		vtab-clevr(task="closest_object_distance")	swinb_imagenet22k_224	0.0001	0.0001	86749374	86749374	100	128	57.63
end2end		vtab-clevr(task="closest_object_distance")	swinb_imagenet22k_224	0.0001	0.0001	86749374	86749374	100	128	60.13
end2end		vtab-clevr(task="count_all")	imagenet22k_sup_rnx_base	0.005	0.001	87574664	87574664	100	128	69.81
end2end		vtab-clevr(task="count_all")	imagenet22k_sup_rnx_base	0.005	0.001	87574664	87574664	100	128	80.73
end2end		vtab-clevr(task="count_all")	imagenet22k_sup_rnx_base	0.005	0.001	87574664	87574664	100	128	83.83
end2end		vtab-clevr(task="count_all")	imagenet_sup_rn50	0.005	0	23524424	23524424	100	384	51.33
end2end		vtab-clevr(task="count_all")	imagenet_sup_rn50	0.005	0	23524424	23524424	100	384	50.47
end2end		vtab-clevr(task="count_all")	imagenet_sup_rn50	0.005	0	23524424	23524424	100	384	49.12
end2end		vtab-clevr(task="count_all")	sup_vitb16_imagenet21k	0.0005	0.001	85804808	85804808	100	128	50.97
end2end		vtab-clevr(task="count_all")	sup_vitb16_imagenet21k	0.0005	0.001	85804808	85804808	100	128	57.57
end2end		vtab-clevr(task="count_all")	sup_vitb16_imagenet21k	0.0005	0.001	85804808	85804808	100	128	60.49
end2end		vtab-clevr(task="count_all")	sup_vith14_imagenet21k	0.0005	0.01	630775048	630775048	100	28	47.53
end2end		vtab-clevr(task="count_all")	sup_vith14_imagenet21k	0.0005	0.01	630775048	630775048	100	28	49.17
end2end		vtab-clevr(task="count_all")	sup_vith14_imagenet21k	0.0005	0.01	630775048	630775048	100	28	46.14
end2end		vtab-clevr(task="count_all")	sup_vitl16_imagenet21k	0.001	0.01	303309832	303309832	100	64	51.25
end2end		vtab-clevr(task="count_all")	sup_vitl16_imagenet21k	0.001	0.01	303309832	303309832	100	64	56.85
end2end		vtab-clevr(task="count_all")	sup_vitl16_imagenet21k	0.001	0.01	303309832	303309832	100	64	58.03
end2end		vtab-clevr(task="count_all")	swinb_imagenet22k_224	0.001	0.001	86751424	86751424	100	128	79.5
end2end		vtab-clevr(task="count_all")	swinb_imagenet22k_224	0.001	0.001	86751424	86751424	100	128	77
end2end		vtab-clevr(task="count_all")	swinb_imagenet22k_224	0.001	0.001	86751424	86751424	100	128	70.48
end2end		vtab-diabetic_retinopathy(config="btgraham-300")	imagenet22k_sup_rnx_base	0.0005	0.01	87571589	87571589	100	128	73.09
end2end		vtab-diabetic_retinopathy(config="btgraham-300")	imagenet22k_sup_rnx_base	0.0005	0.01	87571589	87571589	100	128	72.54
end2end		vtab-diabetic_retinopathy(config="btgraham-300")	imagenet22k_sup_rnx_base	0.0005	0.01	87571589	87571589	100	128	74.37
end2end		vtab-diabetic_retinopathy(config="btgraham-300")	imagenet_sup_rn50	0.025	0.001	23518277	23518277	100	384	73.39
end2end		vtab-diabetic_retinopathy(config="btgraham-300")	imagenet_sup_rn50	0.025	0.001	23518277	23518277	100	384	73.2
end2end		vtab-diabetic_retinopathy(config="btgraham-300")	imagenet_sup_rn50	0.025	0.001	23518277	23518277	100	384	57.2
end2end		vtab-diabetic_retinopathy(config="btgraham-300")	imagenet_sup_rn50	0.05	0.01	23518277	23518277	100	384	73.6
end2end		vtab-diabetic_retinopathy(config="btgraham-300")	imagenet_sup_rn50	0.05	0.01	23518277	23518277	100	384	69.96
end2end		vtab-diabetic_retinopathy(config="btgraham-300")	imagenet_sup_rn50	0.05	0.01	23518277	23518277	100	384	73.6
end2end		vtab-diabetic_retinopathy(config="btgraham-300")	sup_vitb16_imagenet21k	0.0005	0	85802501	85802501	100	128	74.15
end2end		vtab-diabetic_retinopathy(config="btgraham-300")	sup_vitb16_imagenet21k	0.0005	0	85802501	85802501	100	128	73.94
end2end		vtab-diabetic_retinopathy(config="btgraham-300")	sup_vitb16_imagenet21k	0.0005	0	85802501	85802501	100	128	73.5
end2end		vtab-diabetic_retinopathy(config="btgraham-300")	sup_vith14_imagenet21k	0.001	0.001	630771205	630771205	100	28	73.92
end2end		vtab-diabetic_retinopathy(config="btgraham-300")	sup_vith14_imagenet21k	0.001	0.001	630771205	630771205	100	28	73.89
end2end		vtab-diabetic_retinopathy(config="btgraham-300")	sup_vith14_imagenet21k	0.001	0.001	630771205	630771205	100	28	73.97
end2end		vtab-diabetic_retinopathy(config="btgraham-300")	sup_vith14_imagenet21k	0.005	0.01	630771205	630771205	100	28	73.74
end2end		vtab-diabetic_retinopathy(config="btgraham-300")	sup_vith14_imagenet21k	0.005	0.01	630771205	630771205	100	28	73.64
end2end		vtab-diabetic_retinopathy(config="btgraham-300")	sup_vith14_imagenet21k	0.005	0.01	630771205	630771205	100	28	73.64
end2end		vtab-diabetic_retinopathy(config="btgraham-300")	sup_vitl16_imagenet21k	0.0005	0.01	303306757	303306757	100	64	74.84
end2end		vtab-diabetic_retinopathy(config="btgraham-300")	sup_vitl16_imagenet21k	0.0005	0.01	303306757	303306757	100	64	74.36
end2end		vtab-diabetic_retinopathy(config="btgraham-300")	sup_vitl16_imagenet21k	0.0005	0.01	303306757	303306757	100	64	73.37
end2end		vtab-diabetic_retinopathy(config="btgraham-300")	swinb_imagenet22k_224	0.0001	0	86748349	86748349	100	128	73.53
end2end		vtab-diabetic_retinopathy(config="btgraham-300")	swinb_imagenet22k_224	0.0001	0	86748349	86748349	100	128	73.84
end2end		vtab-diabetic_retinopathy(config="btgraham-300")	swinb_imagenet22k_224	0.0001	0	86748349	86748349	100	128	73.59
end2end		vtab-diabetic_retinopathy(config="btgraham-300")	swinb_imagenet22k_224	0.005	0.001	86748349	86748349	100	128	73.6
end2end		vtab-diabetic_retinopathy(config="btgraham-300")	swinb_imagenet22k_224	0.005	0.001	86748349	86748349	100	128	73.6
end2end		vtab-diabetic_retinopathy(config="btgraham-300")	swinb_imagenet22k_224	0.005	0.001	86748349	86748349	100	128	73.6
end2end		vtab-dmlab	imagenet22k_sup_rnx_base	0.001	0.001	87572614	87572614	100	128	48.61
end2end		vtab-dmlab	imagenet22k_sup_rnx_base	0.001	0.001	87572614	87572614	100	128	49.36
end2end		vtab-dmlab	imagenet22k_sup_rnx_base	0.001	0.001	87572614	87572614	100	128	51.19
end2end		vtab-dmlab	imagenet_sup_rn50	0.0025	0.01	23520326	23520326	100	384	41.82
end2end		vtab-dmlab	imagenet_sup_rn50	0.0025	0.01	23520326	23520326	100	384	39.95
end2end		vtab-dmlab	imagenet_sup_rn50	0.0025	0.01	23520326	23520326	100	384	42.46
end2end		vtab-dmlab	sup_vitb16_imagenet21k	0.001	0.0001	85803270	85803270	100	128	42.57
end2end		vtab-dmlab	sup_vitb16_imagenet21k	0.001	0.0001	85803270	85803270	100	128	39.96
end2end		vtab-dmlab	sup_vitb16_imagenet21k	0.001	0.0001	85803270	85803270	100	128	42.55
end2end		vtab-dmlab	sup_vith14_imagenet21k	0.0001	0.0001	630772486	630772486	100	28	36.24
end2end		vtab-dmlab	sup_vith14_imagenet21k	0.0001	0.0001	630772486	630772486	100	28	35.58
end2end		vtab-dmlab	sup_vith14_imagenet21k	0.001	0.001	630772486	630772486	100	28	38.61
end2end		vtab-dmlab	sup_vith14_imagenet21k	0.001	0.001	630772486	630772486	100	28	39.62
end2end		vtab-dmlab	sup_vith14_imagenet21k	0.001	0.001	630772486	630772486	100	28	39.01
end2end		vtab-dmlab	sup_vitl16_imagenet21k	0.001	0.01	303307782	303307782	100	64	40.69
end2end		vtab-dmlab	sup_vitl16_imagenet21k	0.001	0.01	303307782	303307782	100	64	43.06
end2end		vtab-dmlab	sup_vitl16_imagenet21k	0.001	0.01	303307782	303307782	100	64	42.76
end2end		vtab-dmlab	swinb_imagenet22k_224	0.001	0.0001	86749374	86749374	100	128	54.34
end2end		vtab-dmlab	swinb_imagenet22k_224	0.001	0.0001	86749374	86749374	100	128	53.46
end2end		vtab-dmlab	swinb_imagenet22k_224	0.001	0.0001	86749374	86749374	100	128	56.01
end2end		vtab-dsprites(predicted_attribute="label_orientation",num_classes=16)	imagenet22k_sup_rnx_base	0.0005	0.0001	87582864	87582864	100	128	60.41
end2end		vtab-dsprites(predicted_attribute="label_orientation",num_classes=16)	imagenet22k_sup_rnx_base	0.0005	0.0001	87582864	87582864	100	128	61.21
end2end		vtab-dsprites(predicted_attribute="label_orientation",num_classes=16)	imagenet22k_sup_rnx_base	0.0005	0.0001	87582864	87582864	100	128	60.09
end2end		vtab-dsprites(predicted_attribute="label_orientation",num_classes=16)	imagenet_sup_rn50	0.0025	0	23540816	23540816	100	384	51.37
end2end		vtab-dsprites(predicted_attribute="label_orientation",num_classes=16)	imagenet_sup_rn50	0.0025	0	23540816	23540816	100	384	48.94
end2end		vtab-dsprites(predicted_attribute="label_orientation",num_classes=16)	imagenet_sup_rn50	0.0025	0	23540816	23540816	100	384	50.63
end2end		vtab-dsprites(predicted_attribute="label_orientation",num_classes=16)	sup_vitb16_imagenet21k	0.0005	0.0001	85810960	85810960	100	128	46.14
end2end		vtab-dsprites(predicted_attribute="label_orientation",num_classes=16)	sup_vitb16_imagenet21k	0.0005	0.0001	85810960	85810960	100	128	45.66
end2end		vtab-dsprites(predicted_attribute="label_orientation",num_classes=16)	sup_vitb16_imagenet21k	0.0005	0.0001	85810960	85810960	100	128	48.31
end2end		vtab-dsprites(predicted_attribute="label_orientation",num_classes=16)	sup_vith14_imagenet21k	0.001	0.01	630785296	630785296	100	28	48.94
end2end		vtab-dsprites(predicted_attribute="label_orientation",num_classes=16)	sup_vith14_imagenet21k	0.001	0.01	630785296	630785296	100	28	49.76
end2end		vtab-dsprites(predicted_attribute="label_orientation",num_classes=16)	sup_vith14_imagenet21k	0.001	0.01	630785296	630785296	100	28	47.1
end2end		vtab-dsprites(predicted_attribute="label_orientation",num_classes=16)	sup_vitl16_imagenet21k	0.0001	0.001	303318032	303318032	100	64	43.5
end2end		vtab-dsprites(predicted_attribute="label_orientation",num_classes=16)	sup_vitl16_imagenet21k	0.0001	0.001	303318032	303318032	100	64	43.36
end2end		vtab-dsprites(predicted_attribute="label_orientation",num_classes=16)	sup_vitl16_imagenet21k	0.0001	0.001	303318032	303318032	100	64	46.7
end2end		vtab-dsprites(predicted_attribute="label_orientation",num_classes=16)	sup_vitl16_imagenet21k	0.0001	0.01	303318032	303318032	100	64	42.21
end2end		vtab-dsprites(predicted_attribute="label_orientation",num_classes=16)	sup_vitl16_imagenet21k	0.0005	0.0001	303318032	303318032	100	64	43.91
end2end		vtab-dsprites(predicted_attribute="label_orientation",num_classes=16)	sup_vitl16_imagenet21k	0.0005	0.0001	303318032	303318032	100	64	43.43
end2end		vtab-dsprites(predicted_attribute="label_orientation",num_classes=16)	sup_vitl16_imagenet21k	0.0005	0.0001	303318032	303318032	100	64	44.43
end2end		vtab-dsprites(predicted_attribute="label_orientation",num_classes=16)	sup_vitl16_imagenet21k	0.001	0.0001	303318032	303318032	100	64	42.16
end2end		vtab-dsprites(predicted_attribute="label_orientation",num_classes=16)	sup_vitl16_imagenet21k	0.001	0.0001	303318032	303318032	100	64	39.62
end2end		vtab-dsprites(predicted_attribute="label_orientation",num_classes=16)	sup_vitl16_imagenet21k	0.001	0.0001	303318032	303318032	100	64	40.32
end2end		vtab-dsprites(predicted_attribute="label_orientation",num_classes=16)	swinb_imagenet22k_224	0.0001	0.001	86759624	86759624	100	128	52.52
end2end		vtab-dsprites(predicted_attribute="label_orientation",num_classes=16)	swinb_imagenet22k_224	0.0001	0.001	86759624	86759624	100	128	54.23
end2end		vtab-dsprites(predicted_attribute="label_orientation",num_classes=16)	swinb_imagenet22k_224	0.0001	0.001	86759624	86759624	100	128	54.16
end2end		vtab-dsprites(predicted_attribute="label_x_position",num_classes=16)	imagenet22k_sup_rnx_base	0.001	0.001	87582864	87582864	100	128	96.87
end2end		vtab-dsprites(predicted_attribute="label_x_position",num_classes=16)	imagenet22k_sup_rnx_base	0.001	0.001	87582864	87582864	100	128	97.67
end2end		vtab-dsprites(predicted_attribute="label_x_position",num_classes=16)	imagenet22k_sup_rnx_base	0.001	0.001	87582864	87582864	100	128	97.78
end2end		vtab-dsprites(predicted_attribute="label_x_position",num_classes=16)	imagenet_sup_rn50	0.0025	0.0001	23540816	23540816	100	384	90.65
end2end		vtab-dsprites(predicted_attribute="label_x_position",num_classes=16)	imagenet_sup_rn50	0.0025	0.0001	23540816	23540816	100	384	78.02
end2end		vtab-dsprites(predicted_attribute="label_x_position",num_classes=16)	imagenet_sup_rn50	0.0025	0.0001	23540816	23540816	100	384	85.15
end2end		vtab-dsprites(predicted_attribute="label_x_position",num_classes=16)	sup_vitb16_imagenet21k	0.0005	0.001	85810960	85810960	100	128	54.14
end2end		vtab-dsprites(predicted_attribute="label_x_position",num_classes=16)	sup_vitb16_imagenet21k	0.0005	0.001	85810960	85810960	100	128	54.66
end2end		vtab-dsprites(predicted_attribute="label_x_position",num_classes=16)	sup_vitb16_imagenet21k	0.0005	0.001	85810960	85810960	100	128	63.59
end2end		vtab-dsprites(predicted_attribute="label_x_position",num_classes=16)	sup_vith14_imagenet21k	0.0005	0.01	630785296	630785296	100	28	49.18
end2end		vtab-dsprites(predicted_attribute="label_x_position",num_classes=16)	sup_vith14_imagenet21k	0.0005	0.01	630785296	630785296	100	28	58.39
end2end		vtab-dsprites(predicted_attribute="label_x_position",num_classes=16)	sup_vith14_imagenet21k	0.0005	0.01	630785296	630785296	100	28	53.73
end2end		vtab-dsprites(predicted_attribute="label_x_position",num_classes=16)	sup_vitl16_imagenet21k	0.0001	0.01	303318032	303318032	100	64	51.86
end2end		vtab-dsprites(predicted_attribute="label_x_position",num_classes=16)	sup_vitl16_imagenet21k	0.0001	0.01	303318032	303318032	100	64	53.2
end2end		vtab-dsprites(predicted_attribute="label_x_position",num_classes=16)	sup_vitl16_imagenet21k	0.0001	0.01	303318032	303318032	100	64	62.91
end2end		vtab-dsprites(predicted_attribute="label_x_position",num_classes=16)	sup_vitl16_imagenet21k	0.0005	0.01	303318032	303318032	100	64	67
end2end		vtab-dsprites(predicted_attribute="label_x_position",num_classes=16)	sup_vitl16_imagenet21k	0.0005	0.01	303318032	303318032	100	64	62.57
end2end		vtab-dsprites(predicted_attribute="label_x_position",num_classes=16)	sup_vitl16_imagenet21k	0.0005	0.01	303318032	303318032	100	64	62.05
end2end		vtab-dsprites(predicted_attribute="label_x_position",num_classes=16)	sup_vitl16_imagenet21k	0.001	0.0001	303318032	303318032	100	64	54.86
end2end		vtab-dsprites(predicted_attribute="label_x_position",num_classes=16)	sup_vitl16_imagenet21k	0.001	0.0001	303318032	303318032	100	64	48.59
end2end		vtab-dsprites(predicted_attribute="label_x_position",num_classes=16)	sup_vitl16_imagenet21k	0.001	0.0001	303318032	303318032	100	64	47.82
end2end		vtab-dsprites(predicted_attribute="label_x_position",num_classes=16)	swinb_imagenet22k_224	0.001	0.0001	86759624	86759624	100	128	79.73
end2end		vtab-dsprites(predicted_attribute="label_x_position",num_classes=16)	swinb_imagenet22k_224	0.001	0.0001	86759624	86759624	100	128	79.53
end2end		vtab-dsprites(predicted_attribute="label_x_position",num_classes=16)	swinb_imagenet22k_224	0.001	0.0001	86759624	86759624	100	128	78.87
end2end		vtab-dtd	imagenet22k_sup_rnx_base	0.001	0.001	87614639	87614639	100	128	68.46
end2end		vtab-dtd	imagenet22k_sup_rnx_base	0.001	0.001	87614639	87614639	100	128	69.31
end2end		vtab-dtd	imagenet22k_sup_rnx_base	0.001	0.001	87614639	87614639	100	128	69.31
end2end		vtab-dtd	imagenet_sup_rn50	0.0005	0.001	23604335	23604335	100	384	49.57
end2end		vtab-dtd	imagenet_sup_rn50	0.0005	0.001	23604335	23604335	100	384	51.12
end2end		vtab-dtd	imagenet_sup_rn50	0.0005	0.001	23604335	23604335	100	384	50.9
end2end		vtab-dtd	sup_vitb16_imagenet21k	0.0005	0.0001	85834799	85834799	100	128	63.3
end2end		vtab-dtd	sup_vitb16_imagenet21k	0.0005	0.0001	85834799	85834799	100	128	65.53
end2end		vtab-dtd	sup_vitb16_imagenet21k	0.0005	0.0001	85834799	85834799	100	128	64.04
end2end		vtab-dtd	sup_vith14_imagenet21k	0.005	0.01	630825007	630825007	100	28	54.2
end2end		vtab-dtd	sup_vith14_imagenet21k	0.005	0.01	630825007	630825007	100	28	56.22
end2end		vtab-dtd	sup_vith14_imagenet21k	0.005	0.01	630825007	630825007	100	28	54.63
end2end		vtab-dtd	sup_vitl16_imagenet21k	0.001	0.01	303349807	303349807	100	64	58.3
end2end		vtab-dtd	sup_vitl16_imagenet21k	0.001	0.01	303349807	303349807	100	64	58.3
end2end		vtab-dtd	sup_vitl16_imagenet21k	0.001	0.01	303349807	303349807	100	64	59.26
end2end		vtab-dtd	swinb_imagenet22k_224	0.0001	0.0001	86791399	86791399	100	128	71.49
end2end		vtab-dtd	swinb_imagenet22k_224	0.0001	0.0001	86791399	86791399	100	128	70.21
end2end		vtab-dtd	swinb_imagenet22k_224	0.0001	0.0001	86791399	86791399	100	128	72.39
end2end		vtab-eurosat	imagenet22k_sup_rnx_base	0.005	0.01	87576714	87576714	100	128	94.37
end2end		vtab-eurosat	imagenet22k_sup_rnx_base	0.005	0.01	87576714	87576714	100	128	95.35
end2end		vtab-eurosat	imagenet22k_sup_rnx_base	0.005	0.01	87576714	87576714	100	128	94.35
end2end		vtab-eurosat	imagenet_sup_rn50	0.0005	0.001	23528522	23528522	100	384	90.83
end2end		vtab-eurosat	imagenet_sup_rn50	0.0005	0.001	23528522	23528522	100	384	89.11
end2end		vtab-eurosat	imagenet_sup_rn50	0.0005	0.001	23528522	23528522	100	384	91.74
end2end		vtab-eurosat	sup_vitb16_imagenet21k	0.0005	0.0001	85806346	85806346	100	128	95.22
end2end		vtab-eurosat	sup_vitb16_imagenet21k	0.0005	0.0001	85806346	85806346	100	128	95.94
end2end		vtab-eurosat	sup_vitb16_imagenet21k	0.0005	0.0001	85806346	85806346	100	128	95.94
end2end		vtab-eurosat	sup_vith14_imagenet21k	0.005	0.001	630777610	630777610	100	28	95.74
end2end		vtab-eurosat	sup_vith14_imagenet21k	0.005	0.001	630777610	630777610	100	28	95.5
end2end		vtab-eurosat	sup_vith14_imagenet21k	0.005	0.001	630777610	630777610	100	28	95.35
end2end		vtab-eurosat	sup_vitl16_imagenet21k	0.001	0.001	303311882	303311882	100	64	95.43
end2end		vtab-eurosat	sup_vitl16_imagenet21k	0.001	0.001	303311882	303311882	100	64	96
end2end		vtab-eurosat	sup_vitl16_imagenet21k	0.001	0.001	303311882	303311882	100	64	96.3
end2end		vtab-eurosat	swinb_imagenet22k_224	0.0005	0.001	86753474	86753474	100	128	96.93
end2end		vtab-eurosat	swinb_imagenet22k_224	0.0005	0.001	86753474	86753474	100	128	96.94
end2end		vtab-eurosat	swinb_imagenet22k_224	0.0005	0.001	86753474	86753474	100	128	96.91
end2end		vtab-kitti(task="closest_vehicle_distance")	imagenet22k_sup_rnx_base	0.0005	0.0001	87570564	87570564	100	128	74.54
end2end		vtab-kitti(task="closest_vehicle_distance")	imagenet22k_sup_rnx_base	0.0005	0.0001	87570564	87570564	100	128	72.71
end2end		vtab-kitti(task="closest_vehicle_distance")	imagenet22k_sup_rnx_base	0.0005	0.0001	87570564	87570564	100	128	73.56
end2end		vtab-kitti(task="closest_vehicle_distance")	imagenet_sup_rn50	0.0025	0	23516228	23516228	100	384	76.65
end2end		vtab-kitti(task="closest_vehicle_distance")	imagenet_sup_rn50	0.0025	0	23516228	23516228	100	384	76.65
end2end		vtab-kitti(task="closest_vehicle_distance")	imagenet_sup_rn50	0.0025	0	23516228	23516228	100	384	76.65
end2end		vtab-kitti(task="closest_vehicle_distance")	sup_vitb16_imagenet21k	0.0001	0.001	85801732	85801732	100	128	63.01
end2end		vtab-kitti(task="closest_vehicle_distance")	sup_vitb16_imagenet21k	0.0001	0.001	85801732	85801732	100	128	67.23
end2end		vtab-kitti(task="closest_vehicle_distance")	sup_vitb16_imagenet21k	0.0001	0.001	85801732	85801732	100	128	66.24
end2end		vtab-kitti(task="closest_vehicle_distance")	sup_vith14_imagenet21k	0.0005	0.001	630769924	630769924	100	28	68.35
end2end		vtab-kitti(task="closest_vehicle_distance")	sup_vith14_imagenet21k	0.0005	0.001	630769924	630769924	100	28	70.46
end2end		vtab-kitti(task="closest_vehicle_distance")	sup_vith14_imagenet21k	0.0005	0.001	630769924	630769924	100	28	69.34
end2end		vtab-kitti(task="closest_vehicle_distance")	sup_vith14_imagenet21k	0.001	0.01	630769924	630769924	100	28	69.9
end2end		vtab-kitti(task="closest_vehicle_distance")	sup_vith14_imagenet21k	0.001	0.01	630769924	630769924	100	28	71.45
end2end		vtab-kitti(task="closest_vehicle_distance")	sup_vitl16_imagenet21k	0.001	0.001	303305732	303305732	100	64	73.42
end2end		vtab-kitti(task="closest_vehicle_distance")	sup_vitl16_imagenet21k	0.001	0.001	303305732	303305732	100	64	73.42
end2end		vtab-kitti(task="closest_vehicle_distance")	sup_vitl16_imagenet21k	0.001	0.001	303305732	303305732	100	64	75.81
end2end		vtab-kitti(task="closest_vehicle_distance")	swinb_imagenet22k_224	0.0005	0.01	86747324	86747324	100	128	79.89
end2end		vtab-kitti(task="closest_vehicle_distance")	swinb_imagenet22k_224	0.0005	0.01	86747324	86747324	100	128	78.62
end2end		vtab-kitti(task="closest_vehicle_distance")	swinb_imagenet22k_224	0.0005	0.01	86747324	86747324	100	128	77.22
end2end		vtab-oxford_flowers102	imagenet22k_sup_rnx_base	0.0005	0.01	87671014	87671014	100	128	98.42
end2end		vtab-oxford_flowers102	imagenet22k_sup_rnx_base	0.0005	0.01	87671014	87671014	100	128	98.76
end2end		vtab-oxford_flowers102	imagenet22k_sup_rnx_base	0.0005	0.01	87671014	87671014	100	128	98.96
end2end		vtab-oxford_flowers102	imagenet_sup_rn50	0.005	0.01	23717030	23717030	100	384	74.63
end2end		vtab-oxford_flowers102	imagenet_sup_rn50	0.005	0.01	23717030	23717030	100	384	73.22
end2end		vtab-oxford_flowers102	imagenet_sup_rn50	0.005	0.01	23717030	23717030	100	384	74.94
end2end		vtab-oxford_flowers102	sup_vitb16_imagenet21k	0.001	0.001	85877094	85877094	100	128	97.53
end2end		vtab-oxford_flowers102	sup_vitb16_imagenet21k	0.001	0.001	85877094	85877094	100	128	96.93
end2end		vtab-oxford_flowers102	sup_vitb16_imagenet21k	0.001	0.001	85877094	85877094	100	128	97.04
end2end		vtab-oxford_flowers102	sup_vith14_imagenet21k	0.005	0.001	630895462	630895462	100	28	96.94
end2end		vtab-oxford_flowers102	sup_vith14_imagenet21k	0.005	0.001	630895462	630895462	100	28	96.15
end2end		vtab-oxford_flowers102	sup_vith14_imagenet21k	0.005	0.001	630895462	630895462	100	28	96.39
end2end		vtab-oxford_flowers102	sup_vitl16_imagenet21k	0.0005	0.0001	303406182	303406182	100	64	97.51
end2end		vtab-oxford_flowers102	sup_vitl16_imagenet21k	0.0005	0.0001	303406182	303406182	100	64	96.8
end2end		vtab-oxford_flowers102	sup_vitl16_imagenet21k	0.0005	0.0001	303406182	303406182	100	64	96.88
end2end		vtab-oxford_flowers102	sup_vitl16_imagenet21k	0.001	0.001	303406182	303406182	100	64	95.28
end2end		vtab-oxford_flowers102	sup_vitl16_imagenet21k	0.001	0.001	303406182	303406182	100	64	95.82
end2end		vtab-oxford_flowers102	sup_vitl16_imagenet21k	0.001	0.001	303406182	303406182	100	64	95.66
end2end		vtab-oxford_flowers102	swinb_imagenet22k_224	0.001	0.0001	86847774	86847774	100	128	98.32
end2end		vtab-oxford_flowers102	swinb_imagenet22k_224	0.001	0.0001	86847774	86847774	100	128	98.28
end2end		vtab-oxford_flowers102	swinb_imagenet22k_224	0.001	0.0001	86847774	86847774	100	128	98.29
end2end		vtab-oxford_iiit_pet	imagenet22k_sup_rnx_base	0.001	0.01	87604389	87604389	100	128	89.56
end2end		vtab-oxford_iiit_pet	imagenet22k_sup_rnx_base	0.001	0.01	87604389	87604389	100	128	88.2
end2end		vtab-oxford_iiit_pet	imagenet22k_sup_rnx_base	0.001	0.01	87604389	87604389	100	128	87.84
end2end		vtab-oxford_iiit_pet	imagenet_sup_rn50	0.0005	0.001	23583845	23583845	100	384	83.27
end2end		vtab-oxford_iiit_pet	imagenet_sup_rn50	0.0005	0.001	23583845	23583845	100	384	84.11
end2end		vtab-oxford_iiit_pet	imagenet_sup_rn50	0.0005	0.001	23583845	23583845	100	384	81.88
end2end		vtab-oxford_iiit_pet	sup_vitb16_imagenet21k	0.0005	0.0001	85827109	85827109	100	128	87.9
end2end		vtab-oxford_iiit_pet	sup_vitb16_imagenet21k	0.0005	0.0001	85827109	85827109	100	128	87.14
end2end		vtab-oxford_iiit_pet	sup_vitb16_imagenet21k	0.0005	0.0001	85827109	85827109	100	128	85.5
end2end		vtab-oxford_iiit_pet	sup_vith14_imagenet21k	0.005	0.001	630812197	630812197	100	28	83.13
end2end		vtab-oxford_iiit_pet	sup_vith14_imagenet21k	0.005	0.001	630812197	630812197	100	28	72.09
end2end		vtab-oxford_iiit_pet	sup_vith14_imagenet21k	0.005	0.001	630812197	630812197	100	28	83.95
end2end		vtab-oxford_iiit_pet	sup_vitl16_imagenet21k	0.0005	0.01	303339557	303339557	100	64	86.13
end2end		vtab-oxford_iiit_pet	sup_vitl16_imagenet21k	0.0005	0.01	303339557	303339557	100	64	87.11
end2end		vtab-oxford_iiit_pet	sup_vitl16_imagenet21k	0.0005	0.01	303339557	303339557	100	64	88.2
end2end		vtab-oxford_iiit_pet	sup_vitl16_imagenet21k	0.005	0	303339557	303339557	100	64	84.71
end2end		vtab-oxford_iiit_pet	swinb_imagenet22k_224	0.0005	0.0001	86781149	86781149	100	128	89.89
end2end		vtab-oxford_iiit_pet	swinb_imagenet22k_224	0.0005	0.0001	86781149	86781149	100	128	89.15
end2end		vtab-oxford_iiit_pet	swinb_imagenet22k_224	0.0005	0.0001	86781149	86781149	100	128	89.32
end2end		vtab-patch_camelyon	imagenet22k_sup_rnx_base	0.0005	0.01	87568514	87568514	100	128	83.8
end2end		vtab-patch_camelyon	imagenet22k_sup_rnx_base	0.0005	0.01	87568514	87568514	100	128	84.84
end2end		vtab-patch_camelyon	imagenet22k_sup_rnx_base	0.0005	0.01	87568514	87568514	100	128	85.67
end2end		vtab-patch_camelyon	imagenet_sup_rn50	0.0005	0.01	23512130	23512130	100	384	80.08
end2end		vtab-patch_camelyon	imagenet_sup_rn50	0.0005	0.01	23512130	23512130	100	384	78.65
end2end		vtab-patch_camelyon	imagenet_sup_rn50	0.0005	0.01	23512130	23512130	100	384	81.47
end2end		vtab-patch_camelyon	sup_vitb16_imagenet21k	0.001	0.01	85800194	85800194	100	128	82.01
end2end		vtab-patch_camelyon	sup_vitb16_imagenet21k	0.001	0.01	85800194	85800194	100	128	77.85
end2end		vtab-patch_camelyon	sup_vitb16_imagenet21k	0.001	0.01	85800194	85800194	100	128	79.08
end2end		vtab-patch_camelyon	sup_vith14_imagenet21k	0.0005	0.0001	630767362	630767362	100	28	81.88
end2end		vtab-patch_camelyon	sup_vith14_imagenet21k	0.0005	0.0001	630767362	630767362	100	28	84.66
end2end		vtab-patch_camelyon	sup_vith14_imagenet21k	0.0005	0.0001	630767362	630767362	100	28	82.29
end2end		vtab-patch_camelyon	sup_vith14_imagenet21k	0.001	0.001	630767362	630767362	100	28	83.51
end2end		vtab-patch_camelyon	sup_vith14_imagenet21k	0.001	0.001	630767362	630767362	100	28	82.89
end2end		vtab-patch_camelyon	sup_vitl16_imagenet21k	0.0005	0.001	303303682	303303682	100	64	80.23
end2end		vtab-patch_camelyon	sup_vitl16_imagenet21k	0.0005	0.001	303303682	303303682	100	64	83.02
end2end		vtab-patch_camelyon	sup_vitl16_imagenet21k	0.0005	0.001	303303682	303303682	100	64	84.67
end2end		vtab-patch_camelyon	swinb_imagenet22k_224	0.0001	0.001	86745274	86745274	100	128	86.15
end2end		vtab-patch_camelyon	swinb_imagenet22k_224	0.0001	0.001	86745274	86745274	100	128	86.94
end2end		vtab-patch_camelyon	swinb_imagenet22k_224	0.0001	0.001	86745274	86745274	100	128	86.71
end2end		vtab-resisc45	imagenet22k_sup_rnx_base	0.001	0.001	87612589	87612589	100	128	81.52
end2end		vtab-resisc45	imagenet22k_sup_rnx_base	0.001	0.001	87612589	87612589	100	128	81.16
end2end		vtab-resisc45	imagenet22k_sup_rnx_base	0.001	0.001	87612589	87612589	100	128	83.46
end2end		vtab-resisc45	imagenet_sup_rn50	0.005	0	23600237	23600237	100	384	65.78
end2end		vtab-resisc45	imagenet_sup_rn50	0.005	0	23600237	23600237	100	384	64.43
end2end		vtab-resisc45	imagenet_sup_rn50	0.005	0	23600237	23600237	100	384	67.37
end2end		vtab-resisc45	sup_vitb16_imagenet21k	0.001	0.0001	85833261	85833261	100	128	84.35
end2end		vtab-resisc45	sup_vitb16_imagenet21k	0.001	0.0001	85833261	85833261	100	128	84.3
end2end		vtab-resisc45	sup_vitb16_imagenet21k	0.001	0.0001	85833261	85833261	100	128	84.08
end2end		vtab-resisc45	sup_vith14_imagenet21k	0.005	0.01	630822445	630822445	100	28	83.92
end2end		vtab-resisc45	sup_vith14_imagenet21k	0.005	0.01	630822445	630822445	100	28	83.44
end2end		vtab-resisc45	sup_vith14_imagenet21k	0.005	0.01	630822445	630822445	100	28	78.35
end2end		vtab-resisc45	sup_vitl16_imagenet21k	0.001	0.001	303347757	303347757	100	64	81.57
end2end		vtab-resisc45	sup_vitl16_imagenet21k	0.001	0.001	303347757	303347757	100	64	82.86
end2end		vtab-resisc45	sup_vitl16_imagenet21k	0.001	0.001	303347757	303347757	100	64	82.68
end2end		vtab-resisc45	swinb_imagenet22k_224	0.0005	0.01	86789349	86789349	100	128	87.17
end2end		vtab-resisc45	swinb_imagenet22k_224	0.0005	0.01	86789349	86789349	100	128	87.71
end2end		vtab-resisc45	swinb_imagenet22k_224	0.0005	0.01	86789349	86789349	100	128	88.19
end2end		vtab-smallnorb(predicted_attribute="label_azimuth")	imagenet22k_sup_rnx_base	0.001	0.01	87584914	87584914	100	128	34.53
end2end		vtab-smallnorb(predicted_attribute="label_azimuth")	imagenet22k_sup_rnx_base	0.001	0.01	87584914	87584914	100	128	35.74
end2end		vtab-smallnorb(predicted_attribute="label_azimuth")	imagenet22k_sup_rnx_base	0.001	0.01	87584914	87584914	100	128	35.55
end2end		vtab-smallnorb(predicted_attribute="label_azimuth")	imagenet_sup_rn50	0.0025	0.001	23544914	23544914	100	384	26.37
end2end		vtab-smallnorb(predicted_attribute="label_azimuth")	imagenet_sup_rn50	0.0025	0.001	23544914	23544914	100	384	28.47
end2end		vtab-smallnorb(predicted_attribute="label_azimuth")	imagenet_sup_rn50	0.0025	0.001	23544914	23544914	100	384	26.47
end2end		vtab-smallnorb(predicted_attribute="label_azimuth")	sup_vitb16_imagenet21k	0.0001	0.01	85812498	85812498	100	128	22.63
end2end		vtab-smallnorb(predicted_attribute="label_azimuth")	sup_vitb16_imagenet21k	0.0001	0.01	85812498	85812498	100	128	23.41
end2end		vtab-smallnorb(predicted_attribute="label_azimuth")	sup_vitb16_imagenet21k	0.0001	0.01	85812498	85812498	100	128	22.38
end2end		vtab-smallnorb(predicted_attribute="label_azimuth")	sup_vitb16_imagenet21k	0.001	0.01	85812498	85812498	100	128	28.63
end2end		vtab-smallnorb(predicted_attribute="label_azimuth")	sup_vitb16_imagenet21k	0.001	0.01	85812498	85812498	100	128	28.12
end2end		vtab-smallnorb(predicted_attribute="label_azimuth")	sup_vitb16_imagenet21k	0.001	0.01	85812498	85812498	100	128	29.19
end2end		vtab-smallnorb(predicted_attribute="label_azimuth")	sup_vith14_imagenet21k	0.005	0.0001	630787858	630787858	100	28	30.74
end2end		vtab-smallnorb(predicted_attribute="label_azimuth")	sup_vith14_imagenet21k	0.005	0.0001	630787858	630787858	100	28	30.23
end2end		vtab-smallnorb(predicted_attribute="label_azimuth")	sup_vith14_imagenet21k	0.005	0.0001	630787858	630787858	100	28	29.67
end2end		vtab-smallnorb(predicted_attribute="label_azimuth")	sup_vitl16_imagenet21k	0.001	0.0001	303320082	303320082	100	64	29.07
end2end		vtab-smallnorb(predicted_attribute="label_azimuth")	sup_vitl16_imagenet21k	0.001	0.0001	303320082	303320082	100	64	28.02
end2end		vtab-smallnorb(predicted_attribute="label_azimuth")	sup_vitl16_imagenet21k	0.001	0.0001	303320082	303320082	100	64	28.4
end2end		vtab-smallnorb(predicted_attribute="label_azimuth")	swinb_imagenet22k_224	0.001	0.0001	86761674	86761674	100	128	35.26
end2end		vtab-smallnorb(predicted_attribute="label_azimuth")	swinb_imagenet22k_224	0.001	0.0001	86761674	86761674	100	128	33.44
end2end		vtab-smallnorb(predicted_attribute="label_azimuth")	swinb_imagenet22k_224	0.001	0.0001	86761674	86761674	100	128	35.19
end2end		vtab-smallnorb(predicted_attribute="label_elevation")	imagenet22k_sup_rnx_base	0.005	0.001	87575689	87575689	100	128	34.96
end2end		vtab-smallnorb(predicted_attribute="label_elevation")	imagenet22k_sup_rnx_base	0.005	0.001	87575689	87575689	100	128	11.99
end2end		vtab-smallnorb(predicted_attribute="label_elevation")	imagenet22k_sup_rnx_base	0.005	0.001	87575689	87575689	100	128	34.43
end2end		vtab-smallnorb(predicted_attribute="label_elevation")	imagenet_sup_rn50	0.0025	0.001	23526473	23526473	100	384	36.89
end2end		vtab-smallnorb(predicted_attribute="label_elevation")	imagenet_sup_rn50	0.0025	0.001	23526473	23526473	100	384	39.78
end2end		vtab-smallnorb(predicted_attribute="label_elevation")	imagenet_sup_rn50	0.0025	0.001	23526473	23526473	100	384	40.78
end2end		vtab-smallnorb(predicted_attribute="label_elevation")	sup_vitb16_imagenet21k	0.0005	0.001	85805577	85805577	100	128	29.25
end2end		vtab-smallnorb(predicted_attribute="label_elevation")	sup_vitb16_imagenet21k	0.0005	0.001	85805577	85805577	100	128	28.52
end2end		vtab-smallnorb(predicted_attribute="label_elevation")	sup_vitb16_imagenet21k	0.0005	0.001	85805577	85805577	100	128	29.52
end2end		vtab-smallnorb(predicted_attribute="label_elevation")	sup_vith14_imagenet21k	0.005	0.0001	630776329	630776329	100	28	25.34
end2end		vtab-smallnorb(predicted_attribute="label_elevation")	sup_vith14_imagenet21k	0.005	0.0001	630776329	630776329	100	28	25.99
end2end		vtab-smallnorb(predicted_attribute="label_elevation")	sup_vith14_imagenet21k	0.005	0.0001	630776329	630776329	100	28	26.03
end2end		vtab-smallnorb(predicted_attribute="label_elevation")	sup_vitl16_imagenet21k	0.001	0.001	303310857	303310857	100	64	29.25
end2end		vtab-smallnorb(predicted_attribute="label_elevation")	sup_vitl16_imagenet21k	0.001	0.001	303310857	303310857	100	64	30.34
end2end		vtab-smallnorb(predicted_attribute="label_elevation")	sup_vitl16_imagenet21k	0.001	0.001	303310857	303310857	100	64	29.46
end2end		vtab-smallnorb(predicted_attribute="label_elevation")	swinb_imagenet22k_224	0.001	0.0001	86752449	86752449	100	128	41.84
end2end		vtab-smallnorb(predicted_attribute="label_elevation")	swinb_imagenet22k_224	0.001	0.0001	86752449	86752449	100	128	43.37
end2end		vtab-smallnorb(predicted_attribute="label_elevation")	swinb_imagenet22k_224	0.001	0.0001	86752449	86752449	100	128	37.45
end2end		vtab-sun397	imagenet22k_sup_rnx_base	0.001	0.01	87973389	87973389	100	128	46.01
end2end		vtab-sun397	imagenet22k_sup_rnx_base	0.001	0.01	87973389	87973389	100	128	45.83
end2end		vtab-sun397	imagenet22k_sup_rnx_base	0.001	0.01	87973389	87973389	100	128	45.05
end2end		vtab-sun397	imagenet_sup_rn50	0.005	0.001	24321485	24321485	100	384	22.7
end2end		vtab-sun397	imagenet_sup_rn50	0.005	0.001	24321485	24321485	100	384	22.83
end2end		vtab-sun397	imagenet_sup_rn50	0.005	0.001	24321485	24321485	100	384	22.61
end2end		vtab-sun397	sup_vitb16_imagenet21k	0.001	0.001	86103949	86103949	100	128	39.17
end2end		vtab-sun397	sup_vitb16_imagenet21k	0.001	0.001	86103949	86103949	100	128	38.52
end2end		vtab-sun397	sup_vitb16_imagenet21k	0.001	0.001	86103949	86103949	100	128	38.74
end2end		vtab-sun397	sup_vith14_imagenet21k	0.001	0.001	631273357	631273357	100	28	31.76
end2end		vtab-sun397	sup_vith14_imagenet21k	0.001	0.001	631273357	631273357	100	28	33.23
end2end		vtab-sun397	sup_vith14_imagenet21k	0.001	0.001	631273357	631273357	100	28	32.45
end2end		vtab-sun397	sup_vitl16_imagenet21k	0.001	0.001	303708557	303708557	100	64	42.04
end2end		vtab-sun397	sup_vitl16_imagenet21k	0.001	0.001	303708557	303708557	100	64	41.12
end2end		vtab-sun397	sup_vitl16_imagenet21k	0.001	0.001	303708557	303708557	100	64	41.08
end2end		vtab-sun397	swinb_imagenet22k_224	0.0005	0.01	87150149	87150149	100	128	44.68
end2end		vtab-sun397	swinb_imagenet22k_224	0.0005	0.01	87150149	87150149	100	128	45.8
end2end		vtab-sun397	swinb_imagenet22k_224	0.0005	0.01	87150149	87150149	100	128	44.66
end2end		vtab-svhn	imagenet22k_sup_rnx_base	0.0005	0.0001	87576714	87576714	100	128	88.47
end2end		vtab-svhn	imagenet22k_sup_rnx_base	0.0005	0.0001	87576714	87576714	100	128	87.38
end2end		vtab-svhn	imagenet22k_sup_rnx_base	0.0005	0.0001	87576714	87576714	100	128	87.53
end2end		vtab-svhn	imagenet_sup_rn50	0.0025	0.01	23528522	23528522	100	384	67.77
end2end		vtab-svhn	imagenet_sup_rn50	0.0025	0.01	23528522	23528522	100	384	78.03
end2end		vtab-svhn	imagenet_sup_rn50	0.0025	0.01	23528522	23528522	100	384	74.9
end2end		vtab-svhn	sup_vitb16_imagenet21k	0.001	0.001	85806346	85806346	100	128	87.17
end2end		vtab-svhn	sup_vitb16_imagenet21k	0.001	0.001	85806346	85806346	100	128	87.12
end2end		vtab-svhn	sup_vitb16_imagenet21k	0.001	0.001	85806346	85806346	100	128	87.95
end2end		vtab-svhn	sup_vith14_imagenet21k	0.005	0.0001	630777610	630777610	100	28	87.49
end2end		vtab-svhn	sup_vith14_imagenet21k	0.005	0.0001	630777610	630777610	100	28	86.54
end2end		vtab-svhn	sup_vith14_imagenet21k	0.005	0.0001	630777610	630777610	100	28	87.14
end2end		vtab-svhn	sup_vith14_imagenet21k	0.005	0.001	630777610	630777610	100	28	87.65
end2end		vtab-svhn	sup_vith14_imagenet21k	0.005	0.001	630777610	630777610	100	28	88.46
end2end		vtab-svhn	sup_vitl16_imagenet21k	0.001	0.01	303311882	303311882	100	64	86.37
end2end		vtab-svhn	sup_vitl16_imagenet21k	0.001	0.01	303311882	303311882	100	64	89.21
end2end		vtab-svhn	sup_vitl16_imagenet21k	0.001	0.01	303311882	303311882	100	64	87.02
end2end		vtab-svhn	swinb_imagenet22k_224	0.0005	0.0001	86753474	86753474	100	128	88.61
end2end		vtab-svhn	swinb_imagenet22k_224	0.0005	0.0001	86753474	86753474	100	128	89.38
end2end		vtab-svhn	swinb_imagenet22k_224	0.0005	0.0001	86753474	86753474	100	128	87.93
end2end		vtab-svhn	swinb_imagenet22k_224	0.001	0.01	86753474	86753474	100	128	88.28
end2end		vtab-svhn	swinb_imagenet22k_224	0.001	0.01	86753474	86753474	100	128	90.67
end2end		vtab-svhn	swinb_imagenet22k_224	0.001	0.01	86753474	86753474	100	128	91.24
partial		vtab-caltech101	sup_vitb16_imagenet21k	0.001	0.001	85877094	7167846	8.3466	1280	86.29
partial		vtab-caltech101	sup_vitb16_imagenet21k	0.001	0.001	85877094	7167846	8.3466	1280	86.21
partial		vtab-caltech101	sup_vitb16_imagenet21k	0.001	0.001	85877094	7167846	8.3466	1280	85.14
partial		vtab-caltech101	sup_vith14_imagenet21k	0.005	0.0001	630895462	19810662	3.1401	240	83.07
partial		vtab-caltech101	sup_vith14_imagenet21k	0.005	0.0001	630895462	19810662	3.1401	240	83.76
partial		vtab-caltech101	sup_vith14_imagenet21k	0.005	0.0001	630895462	19810662	3.1401	240	82.35
partial		vtab-caltech101	sup_vitl16_imagenet21k	0.0005	0.0001	303406182	12702822	4.1867	640	85.12
partial		vtab-caltech101	sup_vitl16_imagenet21k	0.0005	0.0001	303406182	12702822	4.1867	640	85.06
partial		vtab-caltech101	sup_vitl16_imagenet21k	0.0005	0.0001	303406182	12702822	4.1867	640	85.5
partial		vtab-caltech101	swinb_imagenet22k_224	0.0005	0.001	86847774	12708230	14.6328	1024	88.1
partial		vtab-caltech101	swinb_imagenet22k_224	0.0005	0.001	86847774	12708230	14.6328	1024	89.81
partial		vtab-caltech101	swinb_imagenet22k_224	0.0005	0.001	86847774	12708230	14.6328	1024	89.27
partial		vtab-caltech101	swinb_imagenet22k_224	0.001	0.0001	86847774	12708230	14.6328	1024	88.58
partial		vtab-caltech101	swinb_imagenet22k_224	0.001	0.0001	86847774	12708230	14.6328	1024	88.66
partial		vtab-caltech101	swinb_imagenet22k_224	0.001	0.0001	86847774	12708230	14.6328	1024	89.15
partial		vtab-cifar(num_classes=100)	sup_vitb16_imagenet21k	0.001	0.001	85875556	7166308	8.345	1280	66.2
partial		vtab-cifar(num_classes=100)	sup_vitb16_imagenet21k	0.001	0.001	85875556	7166308	8.345	1280	67.01
partial		vtab-cifar(num_classes=100)	sup_vitb16_imagenet21k	0.001	0.001	85875556	7166308	8.345	1280	67.09
partial		vtab-cifar(num_classes=100)	sup_vith14_imagenet21k	0.005	0.0001	630892900	19808100	3.1397	240	62.29
partial		vtab-cifar(num_classes=100)	sup_vith14_imagenet21k	0.005	0.0001	630892900	19808100	3.1397	240	62.74
partial		vtab-cifar(num_classes=100)	sup_vith14_imagenet21k	0.005	0.0001	630892900	19808100	3.1397	240	62.1
partial		vtab-cifar(num_classes=100)	sup_vitl16_imagenet21k	0.001	0.01	303404132	12700772	4.1861	640	72.62
partial		vtab-cifar(num_classes=100)	sup_vitl16_imagenet21k	0.001	0.01	303404132	12700772	4.1861	640	72.33
partial		vtab-cifar(num_classes=100)	sup_vitl16_imagenet21k	0.001	0.01	303404132	12700772	4.1861	640	72.14
partial		vtab-cifar(num_classes=100)	swinb_imagenet22k_224	0.0005	0.001	86845724	12706180	14.6307	1024	59.83
partial		vtab-cifar(num_classes=100)	swinb_imagenet22k_224	0.0005	0.001	86845724	12706180	14.6307	1024	59.86
partial		vtab-cifar(num_classes=100)	swinb_imagenet22k_224	0.0005	0.001	86845724	12706180	14.6307	1024	61.16
partial		vtab-clevr(task="closest_object_distance")	sup_vitb16_imagenet21k	0.0005	0.0001	85803270	7094022	8.2678	1280	33.09
partial		vtab-clevr(task="closest_object_distance")	sup_vitb16_imagenet21k	0.0005	0.0001	85803270	7094022	8.2678	1280	35.99
partial		vtab-clevr(task="closest_object_distance")	sup_vitb16_imagenet21k	0.0005	0.0001	85803270	7094022	8.2678	1280	33.87
partial		vtab-clevr(task="closest_object_distance")	sup_vith14_imagenet21k	0.005	0.0001	630772486	19687686	3.1212	240	42.43
partial		vtab-clevr(task="closest_object_distance")	sup_vith14_imagenet21k	0.005	0.0001	630772486	19687686	3.1212	240	46.22
partial		vtab-clevr(task="closest_object_distance")	sup_vith14_imagenet21k	0.005	0.0001	630772486	19687686	3.1212	240	46.85
partial		vtab-clevr(task="closest_object_distance")	sup_vitl16_imagenet21k	0.0005	0.001	303307782	12604422	4.1557	640	36.67
partial		vtab-clevr(task="closest_object_distance")	sup_vitl16_imagenet21k	0.0005	0.001	303307782	12604422	4.1557	640	39.67
partial		vtab-clevr(task="closest_object_distance")	sup_vitl16_imagenet21k	0.0005	0.001	303307782	12604422	4.1557	640	43.15
partial		vtab-clevr(task="closest_object_distance")	swinb_imagenet22k_224	0.0005	0.01	86749374	12609830	14.5359	1024	33.14
partial		vtab-clevr(task="closest_object_distance")	swinb_imagenet22k_224	0.0005	0.01	86749374	12609830	14.5359	1024	40.04
partial		vtab-clevr(task="closest_object_distance")	swinb_imagenet22k_224	0.0005	0.01	86749374	12609830	14.5359	1024	33.43
partial		vtab-clevr(task="count_all")	sup_vitb16_imagenet21k	0.001	0.01	85804808	7095560	8.2694	1280	40.17
partial		vtab-clevr(task="count_all")	sup_vitb16_imagenet21k	0.001	0.01	85804808	7095560	8.2694	1280	38.9
partial		vtab-clevr(task="count_all")	sup_vitb16_imagenet21k	0.001	0.01	85804808	7095560	8.2694	1280	45.53
partial		vtab-clevr(task="count_all")	sup_vith14_imagenet21k	0.001	0.0001	630775048	19690248	3.1216	240	42.71
partial		vtab-clevr(task="count_all")	sup_vith14_imagenet21k	0.001	0.0001	630775048	19690248	3.1216	240	44.39
partial		vtab-clevr(task="count_all")	sup_vith14_imagenet21k	0.001	0.0001	630775048	19690248	3.1216	240	42.13
partial		vtab-clevr(task="count_all")	sup_vitl16_imagenet21k	0.0005	0.01	303309832	12606472	4.1563	640	40.77
partial		vtab-clevr(task="count_all")	sup_vitl16_imagenet21k	0.0005	0.01	303309832	12606472	4.1563	640	42.44
partial		vtab-clevr(task="count_all")	sup_vitl16_imagenet21k	0.0005	0.01	303309832	12606472	4.1563	640	42.26
partial		vtab-clevr(task="count_all")	swinb_imagenet22k_224	0.0001	0.0001	86751424	12611880	14.538	1024	34.05
partial		vtab-clevr(task="count_all")	swinb_imagenet22k_224	0.0001	0.0001	86751424	12611880	14.538	1024	33.21
partial		vtab-clevr(task="count_all")	swinb_imagenet22k_224	0.0001	0.0001	86751424	12611880	14.538	1024	35.77
partial		vtab-diabetic_retinopathy(config="btgraham-300")	sup_vitb16_imagenet21k	0.001	0	85802501	7093253	8.267	1280	73.31
partial		vtab-diabetic_retinopathy(config="btgraham-300")	sup_vitb16_imagenet21k	0.001	0	85802501	7093253	8.267	1280	73.6
partial		vtab-diabetic_retinopathy(config="btgraham-300")	sup_vitb16_imagenet21k	0.001	0	85802501	7093253	8.267	1280	72.84
partial		vtab-diabetic_retinopathy(config="btgraham-300")	sup_vith14_imagenet21k	0.005	0	630771205	19686405	3.121	240	73.22
partial		vtab-diabetic_retinopathy(config="btgraham-300")	sup_vith14_imagenet21k	0.005	0	630771205	19686405	3.121	240	72.79
partial		vtab-diabetic_retinopathy(config="btgraham-300")	sup_vith14_imagenet21k	0.005	0	630771205	19686405	3.121	240	73.33
partial		vtab-diabetic_retinopathy(config="btgraham-300")	sup_vitl16_imagenet21k	0.001	0.001	303306757	12603397	4.1553	640	73.69
partial		vtab-diabetic_retinopathy(config="btgraham-300")	sup_vitl16_imagenet21k	0.001	0.001	303306757	12603397	4.1553	640	73.79
partial		vtab-diabetic_retinopathy(config="btgraham-300")	sup_vitl16_imagenet21k	0.001	0.001	303306757	12603397	4.1553	640	73.11
partial		vtab-diabetic_retinopathy(config="btgraham-300")	swinb_imagenet22k_224	0.001	0.0001	86748349	12608805	14.5349	1024	72.79
partial		vtab-diabetic_retinopathy(config="btgraham-300")	swinb_imagenet22k_224	0.001	0.0001	86748349	12608805	14.5349	1024	71.34
partial		vtab-diabetic_retinopathy(config="btgraham-300")	swinb_imagenet22k_224	0.001	0.0001	86748349	12608805	14.5349	1024	72.65
partial		vtab-dmlab	sup_vitb16_imagenet21k	0.0005	0.01	85803270	7094022	8.2678	1280	34.5
partial		vtab-dmlab	sup_vitb16_imagenet21k	0.0005	0.01	85803270	7094022	8.2678	1280	33.69
partial		vtab-dmlab	sup_vitb16_imagenet21k	0.0005	0.01	85803270	7094022	8.2678	1280	33.35
partial		vtab-dmlab	sup_vith14_imagenet21k	0.005	0.001	630772486	19687686	3.1212	240	37.54
partial		vtab-dmlab	sup_vith14_imagenet21k	0.005	0.001	630772486	19687686	3.1212	240	36.97
partial		vtab-dmlab	sup_vith14_imagenet21k	0.005	0.001	630772486	19687686	3.1212	240	36.43
partial		vtab-dmlab	sup_vitl16_imagenet21k	0.001	0.01	303307782	12604422	4.1557	640	41.45
partial		vtab-dmlab	sup_vitl16_imagenet21k	0.001	0.01	303307782	12604422	4.1557	640	41.69
partial		vtab-dmlab	sup_vitl16_imagenet21k	0.001	0.01	303307782	12604422	4.1557	640	40.93
partial		vtab-dmlab	swinb_imagenet22k_224	0.001	0.0001	86749374	12609830	14.5359	1024	42.56
partial		vtab-dmlab	swinb_imagenet22k_224	0.001	0.0001	86749374	12609830	14.5359	1024	43.81
partial		vtab-dmlab	swinb_imagenet22k_224	0.001	0.0001	86749374	12609830	14.5359	1024	43.2
partial		vtab-dsprites(predicted_attribute="label_orientation",num_classes=16)	sup_vitb16_imagenet21k	0.0005	0.0001	85810960	7101712	8.276	1280	34.48
partial		vtab-dsprites(predicted_attribute="label_orientation",num_classes=16)	sup_vitb16_imagenet21k	0.0005	0.0001	85810960	7101712	8.276	1280	32.13
partial		vtab-dsprites(predicted_attribute="label_orientation",num_classes=16)	sup_vitb16_imagenet21k	0.0005	0.0001	85810960	7101712	8.276	1280	31.67
partial		vtab-dsprites(predicted_attribute="label_orientation",num_classes=16)	sup_vith14_imagenet21k	0.001	0.0001	630785296	19700496	3.1232	240	39.99
partial		vtab-dsprites(predicted_attribute="label_orientation",num_classes=16)	sup_vith14_imagenet21k	0.001	0.0001	630785296	19700496	3.1232	240	40.68
partial		vtab-dsprites(predicted_attribute="label_orientation",num_classes=16)	sup_vith14_imagenet21k	0.001	0.0001	630785296	19700496	3.1232	240	40.52
partial		vtab-dsprites(predicted_attribute="label_orientation",num_classes=16)	sup_vitl16_imagenet21k	0.0005	0.001	303318032	12614672	4.1589	640	22.76
partial		vtab-dsprites(predicted_attribute="label_orientation",num_classes=16)	sup_vitl16_imagenet21k	0.0005	0.001	303318032	12614672	4.1589	640	27.17
partial		vtab-dsprites(predicted_attribute="label_orientation",num_classes=16)	sup_vitl16_imagenet21k	0.0005	0.001	303318032	12614672	4.1589	640	21.11
partial		vtab-dsprites(predicted_attribute="label_orientation",num_classes=16)	swinb_imagenet22k_224	0.0001	0.01	86759624	12620080	14.546	1024	28.43
partial		vtab-dsprites(predicted_attribute="label_orientation",num_classes=16)	swinb_imagenet22k_224	0.0001	0.01	86759624	12620080	14.546	1024	23.83
partial		vtab-dsprites(predicted_attribute="label_orientation",num_classes=16)	swinb_imagenet22k_224	0.0001	0.01	86759624	12620080	14.546	1024	26.41
partial		vtab-dsprites(predicted_attribute="label_x_position",num_classes=16)	sup_vitb16_imagenet21k	0.0005	0.0001	85810960	7101712	8.276	1280	31.53
partial		vtab-dsprites(predicted_attribute="label_x_position",num_classes=16)	sup_vitb16_imagenet21k	0.0005	0.0001	85810960	7101712	8.276	1280	32.9
partial		vtab-dsprites(predicted_attribute="label_x_position",num_classes=16)	sup_vitb16_imagenet21k	0.0005	0.0001	85810960	7101712	8.276	1280	29.33
partial		vtab-dsprites(predicted_attribute="label_x_position",num_classes=16)	sup_vith14_imagenet21k	0.005	0.0001	630785296	19700496	3.1232	240	44.12
partial		vtab-dsprites(predicted_attribute="label_x_position",num_classes=16)	sup_vith14_imagenet21k	0.005	0.0001	630785296	19700496	3.1232	240	49
partial		vtab-dsprites(predicted_attribute="label_x_position",num_classes=16)	sup_vith14_imagenet21k	0.005	0.0001	630785296	19700496	3.1232	240	46.48
partial		vtab-dsprites(predicted_attribute="label_x_position",num_classes=16)	sup_vitl16_imagenet21k	0.0005	0.0001	303318032	12614672	4.1589	640	23.86
partial		vtab-dsprites(predicted_attribute="label_x_position",num_classes=16)	sup_vitl16_imagenet21k	0.0005	0.0001	303318032	12614672	4.1589	640	29.58
partial		vtab-dsprites(predicted_attribute="label_x_position",num_classes=16)	sup_vitl16_imagenet21k	0.0005	0.0001	303318032	12614672	4.1589	640	24.03
partial		vtab-dsprites(predicted_attribute="label_x_position",num_classes=16)	swinb_imagenet22k_224	0.0001	0.0001	86759624	12620080	14.546	1024	14.74
partial		vtab-dsprites(predicted_attribute="label_x_position",num_classes=16)	swinb_imagenet22k_224	0.0001	0.0001	86759624	12620080	14.546	1024	15.29
partial		vtab-dsprites(predicted_attribute="label_x_position",num_classes=16)	swinb_imagenet22k_224	0.0001	0.0001	86759624	12620080	14.546	1024	17.49
partial		vtab-dtd	sup_vitb16_imagenet21k	0.001	0.001	85834799	7125551	8.3015	1280	63.14
partial		vtab-dtd	sup_vitb16_imagenet21k	0.001	0.001	85834799	7125551	8.3015	1280	62.39
partial		vtab-dtd	sup_vitb16_imagenet21k	0.001	0.001	85834799	7125551	8.3015	1280	61.97
partial		vtab-dtd	sup_vith14_imagenet21k	0.0005	0.01	630825007	19740207	3.1293	240	62.82
partial		vtab-dtd	sup_vith14_imagenet21k	0.0005	0.01	630825007	19740207	3.1293	240	62.29
partial		vtab-dtd	sup_vith14_imagenet21k	0.0005	0.01	630825007	19740207	3.1293	240	63.4
partial		vtab-dtd	sup_vitl16_imagenet21k	0.0005	0.001	303349807	12646447	4.1689	640	63.56
partial		vtab-dtd	sup_vitl16_imagenet21k	0.0005	0.001	303349807	12646447	4.1689	640	62.77
partial		vtab-dtd	sup_vitl16_imagenet21k	0.0005	0.001	303349807	12646447	4.1689	640	64.47
partial		vtab-dtd	swinb_imagenet22k_224	0.001	0.001	86791399	12651855	14.5773	1024	73.14
partial		vtab-dtd	swinb_imagenet22k_224	0.001	0.001	86791399	12651855	14.5773	1024	71.91
partial		vtab-dtd	swinb_imagenet22k_224	0.001	0.001	86791399	12651855	14.5773	1024	72.66
partial		vtab-eurosat	sup_vitb16_imagenet21k	0.001	0.0001	85806346	7097098	8.2711	1280	89.52
partial		vtab-eurosat	sup_vitb16_imagenet21k	0.001	0.0001	85806346	7097098	8.2711	1280	89.98
partial		vtab-eurosat	sup_vitb16_imagenet21k	0.001	0.0001	85806346	7097098	8.2711	1280	89.76
partial		vtab-eurosat	sup_vith14_imagenet21k	0.005	0.001	630777610	19692810	3.122	240	92.94
partial		vtab-eurosat	sup_vith14_imagenet21k	0.005	0.001	630777610	19692810	3.122	240	92.98
partial		vtab-eurosat	sup_vith14_imagenet21k	0.005	0.001	630777610	19692810	3.122	240	92.85
partial		vtab-eurosat	sup_vitl16_imagenet21k	0.0005	0.001	303311882	12608522	4.1569	640	91.28
partial		vtab-eurosat	sup_vitl16_imagenet21k	0.0005	0.001	303311882	12608522	4.1569	640	90.63
partial		vtab-eurosat	sup_vitl16_imagenet21k	0.0005	0.001	303311882	12608522	4.1569	640	90.43
partial		vtab-eurosat	swinb_imagenet22k_224	0.0001	0.0001	86753474	12613930	14.54	1024	91.54
partial		vtab-eurosat	swinb_imagenet22k_224	0.0001	0.0001	86753474	12613930	14.54	1024	90.78
partial		vtab-eurosat	swinb_imagenet22k_224	0.0001	0.0001	86753474	12613930	14.54	1024	90.83
partial		vtab-eurosat	swinb_imagenet22k_224	0.0005	0.01	86753474	12613930	14.54	1024	92.39
partial		vtab-eurosat	swinb_imagenet22k_224	0.0005	0.01	86753474	12613930	14.54	1024	92.46
partial		vtab-eurosat	swinb_imagenet22k_224	0.0005	0.01	86753474	12613930	14.54	1024	91.89
partial		vtab-kitti(task="closest_vehicle_distance")	sup_vitb16_imagenet21k	0.0005	0.001	85801732	7092484	8.2661	1280	60.34
partial		vtab-kitti(task="closest_vehicle_distance")	sup_vitb16_imagenet21k	0.0005	0.001	85801732	7092484	8.2661	1280	60.34
partial		vtab-kitti(task="closest_vehicle_distance")	sup_vitb16_imagenet21k	0.0005	0.001	85801732	7092484	8.2661	1280	62.31
partial		vtab-kitti(task="closest_vehicle_distance")	sup_vith14_imagenet21k	0.005	0.0001	630769924	19685124	3.1208	240	64.14
partial		vtab-kitti(task="closest_vehicle_distance")	sup_vith14_imagenet21k	0.005	0.0001	630769924	19685124	3.1208	240	64.28
partial		vtab-kitti(task="closest_vehicle_distance")	sup_vith14_imagenet21k	0.005	0.0001	630769924	19685124	3.1208	240	66.95
partial		vtab-kitti(task="closest_vehicle_distance")	sup_vitl16_imagenet21k	0.0001	0.0001	303305732	12602372	4.155	640	59.07
partial		vtab-kitti(task="closest_vehicle_distance")	sup_vitl16_imagenet21k	0.0001	0.0001	303305732	12602372	4.155	640	55.7
partial		vtab-kitti(task="closest_vehicle_distance")	sup_vitl16_imagenet21k	0.0001	0.0001	303305732	12602372	4.155	640	54.15
partial		vtab-kitti(task="closest_vehicle_distance")	swinb_imagenet22k_224	0.001	0.0001	86747324	12607780	14.5339	1024	77.36
partial		vtab-kitti(task="closest_vehicle_distance")	swinb_imagenet22k_224	0.001	0.0001	86747324	12607780	14.5339	1024	77.36
partial		vtab-kitti(task="closest_vehicle_distance")	swinb_imagenet22k_224	0.001	0.0001	86747324	12607780	14.5339	1024	76.51
partial		vtab-oxford_flowers102	sup_vitb16_imagenet21k	0.0001	0.0001	85877094	7167846	8.3466	1280	96.96
partial		vtab-oxford_flowers102	sup_vitb16_imagenet21k	0.0001	0.0001	85877094	7167846	8.3466	1280	97.14
partial		vtab-oxford_flowers102	sup_vitb16_imagenet21k	0.0001	0.0001	85877094	7167846	8.3466	1280	97.32
partial		vtab-oxford_flowers102	sup_vitb16_imagenet21k	0.0005	0.001	85877094	7167846	8.3466	1280	97.61
partial		vtab-oxford_flowers102	sup_vitb16_imagenet21k	0.0005	0.001	85877094	7167846	8.3466	1280	97.5
partial		vtab-oxford_flowers102	sup_vitb16_imagenet21k	0.0005	0.001	85877094	7167846	8.3466	1280	97.28
partial		vtab-oxford_flowers102	sup_vith14_imagenet21k	0.0005	0.001	630895462	19810662	3.1401	240	96.91
partial		vtab-oxford_flowers102	sup_vith14_imagenet21k	0.0005	0.001	630895462	19810662	3.1401	240	96.86
partial		vtab-oxford_flowers102	sup_vith14_imagenet21k	0.0005	0.001	630895462	19810662	3.1401	240	96.91
partial		vtab-oxford_flowers102	sup_vitl16_imagenet21k	0.001	0.001	303406182	12702822	4.1867	640	96.23
partial		vtab-oxford_flowers102	sup_vitl16_imagenet21k	0.001	0.001	303406182	12702822	4.1867	640	96.67
partial		vtab-oxford_flowers102	sup_vitl16_imagenet21k	0.001	0.001	303406182	12702822	4.1867	640	96.1
partial		vtab-oxford_flowers102	swinb_imagenet22k_224	0.0001	0.01	86847774	12708230	14.6328	1024	99.07
partial		vtab-oxford_flowers102	swinb_imagenet22k_224	0.0001	0.01	86847774	12708230	14.6328	1024	99.2
partial		vtab-oxford_flowers102	swinb_imagenet22k_224	0.0001	0.01	86847774	12708230	14.6328	1024	99.27
partial		vtab-oxford_flowers102	swinb_imagenet22k_224	0.005	0	86847774	12708230	14.6328	1024	98.52
partial		vtab-oxford_flowers102	swinb_imagenet22k_224	0.005	0	86847774	12708230	14.6328	1024	97.95
partial		vtab-oxford_flowers102	swinb_imagenet22k_224	0.005	0	86847774	12708230	14.6328	1024	98.34
partial		vtab-oxford_iiit_pet	sup_vitb16_imagenet21k	0.001	0.0001	85827109	7117861	8.2933	1280	85.66
partial		vtab-oxford_iiit_pet	sup_vitb16_imagenet21k	0.001	0.0001	85827109	7117861	8.2933	1280	86.45
partial		vtab-oxford_iiit_pet	sup_vitb16_imagenet21k	0.001	0.0001	85827109	7117861	8.2933	1280	85.53
partial		vtab-oxford_iiit_pet	sup_vitb16_imagenet21k	0.005	0.01	85827109	7117861	8.2933	1280	85.75
partial		vtab-oxford_iiit_pet	sup_vitb16_imagenet21k	0.005	0.01	85827109	7117861	8.2933	1280	84.08
partial		vtab-oxford_iiit_pet	sup_vitb16_imagenet21k	0.005	0.01	85827109	7117861	8.2933	1280	85.39
partial		vtab-oxford_iiit_pet	sup_vith14_imagenet21k	0.0005	0.01	630812197	19727397	3.1273	240	82.56
partial		vtab-oxford_iiit_pet	sup_vith14_imagenet21k	0.0005	0.01	630812197	19727397	3.1273	240	83.13
partial		vtab-oxford_iiit_pet	sup_vith14_imagenet21k	0.0005	0.01	630812197	19727397	3.1273	240	82.58
partial		vtab-oxford_iiit_pet	sup_vitl16_imagenet21k	0.0005	0.001	303339557	12636197	4.1657	640	87.11
partial		vtab-oxford_iiit_pet	sup_vitl16_imagenet21k	0.0005	0.001	303339557	12636197	4.1657	640	88.39
partial		vtab-oxford_iiit_pet	sup_vitl16_imagenet21k	0.0005	0.001	303339557	12636197	4.1657	640	86.56
partial		vtab-oxford_iiit_pet	swinb_imagenet22k_224	0.0001	0.001	86781149	12641605	14.5672	1024	90.24
partial		vtab-oxford_iiit_pet	swinb_imagenet22k_224	0.0001	0.001	86781149	12641605	14.5672	1024	88.55
partial		vtab-oxford_iiit_pet	swinb_imagenet22k_224	0.0001	0.001	86781149	12641605	14.5672	1024	89.15
partial		vtab-patch_camelyon	sup_vitb16_imagenet21k	0.0005	0.001	85800194	7090946	8.2645	1280	78.84
partial		vtab-patch_camelyon	sup_vitb16_imagenet21k	0.0005	0.001	85800194	7090946	8.2645	1280	77.82
partial		vtab-patch_camelyon	sup_vitb16_imagenet21k	0.0005	0.001	85800194	7090946	8.2645	1280	79.19
partial		vtab-patch_camelyon	sup_vith14_imagenet21k	0.0005	0.0001	630767362	19682562	3.1204	240	79.69
partial		vtab-patch_camelyon	sup_vith14_imagenet21k	0.0005	0.0001	630767362	19682562	3.1204	240	78.59
partial		vtab-patch_camelyon	sup_vith14_imagenet21k	0.0005	0.0001	630767362	19682562	3.1204	240	79.92
partial		vtab-patch_camelyon	sup_vitl16_imagenet21k	0.001	0.01	303303682	12600322	4.1544	640	81.91
partial		vtab-patch_camelyon	sup_vitl16_imagenet21k	0.001	0.01	303303682	12600322	4.1544	640	80.64
partial		vtab-patch_camelyon	sup_vitl16_imagenet21k	0.001	0.01	303303682	12600322	4.1544	640	82.01
partial		vtab-patch_camelyon	swinb_imagenet22k_224	0.0005	0.01	86745274	12605730	14.5319	1024	81.4
partial		vtab-patch_camelyon	swinb_imagenet22k_224	0.0005	0.01	86745274	12605730	14.5319	1024	83.54
partial		vtab-patch_camelyon	swinb_imagenet22k_224	0.0005	0.01	86745274	12605730	14.5319	1024	83.56
partial		vtab-resisc45	sup_vitb16_imagenet21k	0.0005	0.0001	85833261	7124013	8.2998	1280	72.35
partial		vtab-resisc45	sup_vitb16_imagenet21k	0.0005	0.0001	85833261	7124013	8.2998	1280	72.22
partial		vtab-resisc45	sup_vitb16_imagenet21k	0.0005	0.0001	85833261	7124013	8.2998	1280	72.86
partial		vtab-resisc45	sup_vith14_imagenet21k	0.005	0.0001	630822445	19737645	3.1289	240	74.05
partial		vtab-resisc45	sup_vith14_imagenet21k	0.005	0.0001	630822445	19737645	3.1289	240	74.57
partial		vtab-resisc45	sup_vith14_imagenet21k	0.005	0.0001	630822445	19737645	3.1289	240	74.46
partial		vtab-resisc45	sup_vitl16_imagenet21k	0.001	0.001	303347757	12644397	4.1683	640	74.38
partial		vtab-resisc45	sup_vitl16_imagenet21k	0.001	0.001	303347757	12644397	4.1683	640	74.44
partial		vtab-resisc45	sup_vitl16_imagenet21k	0.001	0.001	303347757	12644397	4.1683	640	74.16
partial		vtab-resisc45	swinb_imagenet22k_224	0.0001	0.01	86789349	12649805	14.5753	1024	80.17
partial		vtab-resisc45	swinb_imagenet22k_224	0.0001	0.01	86789349	12649805	14.5753	1024	80.38
partial		vtab-resisc45	swinb_imagenet22k_224	0.0001	0.01	86789349	12649805	14.5753	1024	79.7
partial		vtab-smallnorb(predicted_attribute="label_azimuth")	sup_vitb16_imagenet21k	0.0001	0.01	85812498	7103250	8.2776	1280	16.19
partial		vtab-smallnorb(predicted_attribute="label_azimuth")	sup_vitb16_imagenet21k	0.0001	0.01	85812498	7103250	8.2776	1280	16.18
partial		vtab-smallnorb(predicted_attribute="label_azimuth")	sup_vitb16_imagenet21k	0.0001	0.01	85812498	7103250	8.2776	1280	16.45
partial		vtab-smallnorb(predicted_attribute="label_azimuth")	sup_vith14_imagenet21k	0.0005	0.01	630787858	19703058	3.1236	240	21.28
partial		vtab-smallnorb(predicted_attribute="label_azimuth")	sup_vith14_imagenet21k	0.0005	0.01	630787858	19703058	3.1236	240	21.41
partial		vtab-smallnorb(predicted_attribute="label_azimuth")	sup_vith14_imagenet21k	0.0005	0.01	630787858	19703058	3.1236	240	20.91
partial		vtab-smallnorb(predicted_attribute="label_azimuth")	sup_vitl16_imagenet21k	0.001	0.01	303320082	12616722	4.1595	640	19.76
partial		vtab-smallnorb(predicted_attribute="label_azimuth")	sup_vitl16_imagenet21k	0.001	0.01	303320082	12616722	4.1595	640	17.01
partial		vtab-smallnorb(predicted_attribute="label_azimuth")	sup_vitl16_imagenet21k	0.001	0.01	303320082	12616722	4.1595	640	18.01
partial		vtab-smallnorb(predicted_attribute="label_azimuth")	swinb_imagenet22k_224	0.001	0.01	86761674	12622130	14.548	1024	18.6
partial		vtab-smallnorb(predicted_attribute="label_azimuth")	swinb_imagenet22k_224	0.001	0.01	86761674	12622130	14.548	1024	19.84
partial		vtab-smallnorb(predicted_attribute="label_azimuth")	swinb_imagenet22k_224	0.001	0.01	86761674	12622130	14.548	1024	18.82
partial		vtab-smallnorb(predicted_attribute="label_elevation")	sup_vitb16_imagenet21k	0.0001	0.01	85805577	7096329	8.2702	1280	23.15
partial		vtab-smallnorb(predicted_attribute="label_elevation")	sup_vitb16_imagenet21k	0.0001	0.01	85805577	7096329	8.2702	1280	21.64
partial		vtab-smallnorb(predicted_attribute="label_elevation")	sup_vitb16_imagenet21k	0.0001	0.01	85805577	7096329	8.2702	1280	22.43
partial		vtab-smallnorb(predicted_attribute="label_elevation")	sup_vith14_imagenet21k	0.005	0.0001	630776329	19691529	3.1218	240	25.34
partial		vtab-smallnorb(predicted_attribute="label_elevation")	sup_vith14_imagenet21k	0.005	0.0001	630776329	19691529	3.1218	240	25.31
partial		vtab-smallnorb(predicted_attribute="label_elevation")	sup_vith14_imagenet21k	0.005	0.0001	630776329	19691529	3.1218	240	25.12
partial		vtab-smallnorb(predicted_attribute="label_elevation")	sup_vitl16_imagenet21k	0.001	0.001	303310857	12607497	4.1566	640	26.03
partial		vtab-smallnorb(predicted_attribute="label_elevation")	sup_vitl16_imagenet21k	0.001	0.001	303310857	12607497	4.1566	640	27.27
partial		vtab-smallnorb(predicted_attribute="label_elevation")	sup_vitl16_imagenet21k	0.001	0.001	303310857	12607497	4.1566	640	26.08
partial		vtab-smallnorb(predicted_attribute="label_elevation")	swinb_imagenet22k_224	0.0005	0.001	86752449	12612905	14.539	1024	28.6
partial		vtab-smallnorb(predicted_attribute="label_elevation")	swinb_imagenet22k_224	0.0005	0.001	86752449	12612905	14.539	1024	28.26
partial		vtab-smallnorb(predicted_attribute="label_elevation")	swinb_imagenet22k_224	0.0005	0.001	86752449	12612905	14.539	1024	28.35
partial		vtab-sun397	sup_vitb16_imagenet21k	0.0005	0.001	86103949	7394701	8.5881	1280	50.71
partial		vtab-sun397	sup_vitb16_imagenet21k	0.0005	0.001	86103949	7394701	8.5881	1280	50.68
partial		vtab-sun397	sup_vitb16_imagenet21k	0.0005	0.001	86103949	7394701	8.5881	1280	50.41
partial		vtab-sun397	sup_vith14_imagenet21k	0.005	0.01	631273357	20188557	3.1981	240	44.21
partial		vtab-sun397	sup_vith14_imagenet21k	0.005	0.01	631273357	20188557	3.1981	240	44.63
partial		vtab-sun397	sup_vith14_imagenet21k	0.005	0.01	631273357	20188557	3.1981	240	45.03
partial		vtab-sun397	sup_vitl16_imagenet21k	0.001	0.01	303708557	13005197	4.2821	640	51.23
partial		vtab-sun397	sup_vitl16_imagenet21k	0.001	0.01	303708557	13005197	4.2821	640	51.11
partial		vtab-sun397	sup_vitl16_imagenet21k	0.001	0.01	303708557	13005197	4.2821	640	51.69
partial		vtab-sun397	swinb_imagenet22k_224	0.0001	0.001	87150149	13010605	14.929	1024	52.17
partial		vtab-sun397	swinb_imagenet22k_224	0.0001	0.001	87150149	13010605	14.929	1024	51.24
partial		vtab-sun397	swinb_imagenet22k_224	0.0001	0.001	87150149	13010605	14.929	1024	50.94
partial		vtab-svhn	sup_vitb16_imagenet21k	0.001	0.001	85806346	7097098	8.2711	1280	36.14
partial		vtab-svhn	sup_vitb16_imagenet21k	0.001	0.001	85806346	7097098	8.2711	1280	38.45
partial		vtab-svhn	sup_vitb16_imagenet21k	0.001	0.001	85806346	7097098	8.2711	1280	38.08
partial		vtab-svhn	sup_vith14_imagenet21k	0.005	0.01	630777610	19692810	3.122	240	53.86
partial		vtab-svhn	sup_vith14_imagenet21k	0.005	0.01	630777610	19692810	3.122	240	56.55
partial		vtab-svhn	sup_vith14_imagenet21k	0.005	0.01	630777610	19692810	3.122	240	58.3
partial		vtab-svhn	sup_vitl16_imagenet21k	0.001	0.0001	303311882	12608522	4.1569	640	49.5
partial		vtab-svhn	sup_vitl16_imagenet21k	0.001	0.0001	303311882	12608522	4.1569	640	53.28
partial		vtab-svhn	sup_vitl16_imagenet21k	0.001	0.0001	303311882	12608522	4.1569	640	52.29
partial		vtab-svhn	swinb_imagenet22k_224	0.0005	0.01	86753474	12613930	14.54	1024	52.07
partial		vtab-svhn	swinb_imagenet22k_224	0.0005	0.01	86753474	12613930	14.54	1024	49.81
partial		vtab-svhn	swinb_imagenet22k_224	0.0005	0.01	86753474	12613930	14.54	1024	49.61
partial		vtab-caltech101	imagenet22k_sup_rnx_base	0.005	0.0001	87671014	8554598	9.7576	1024	87.25
partial		vtab-caltech101	imagenet22k_sup_rnx_base	0.005	0.0001	87671014	8554598	9.7576	1024	88.1
partial		vtab-caltech101	imagenet22k_sup_rnx_base	0.005	0.0001	87671014	8554598	9.7576	1024	89.3
partial		vtab-caltech101	imagenet_sup_rn50	0.05	0.01	23717030	4671590	19.6972	2048	85.88
partial		vtab-caltech101	imagenet_sup_rn50	0.05	0.01	23717030	4671590	19.6972	2048	85.01
partial		vtab-caltech101	imagenet_sup_rn50	0.05	0.01	23717030	4671590	19.6972	2048	83.42
partial		vtab-cifar(num_classes=100)	imagenet22k_sup_rnx_base	0.0005	0.001	87668964	8552548	9.7555	1024	59.56
partial		vtab-cifar(num_classes=100)	imagenet22k_sup_rnx_base	0.0005	0.001	87668964	8552548	9.7555	1024	61.94
partial		vtab-cifar(num_classes=100)	imagenet22k_sup_rnx_base	0.0005	0.001	87668964	8552548	9.7555	1024	60.4
partial		vtab-cifar(num_classes=100)	imagenet_sup_rn50	0.0025	0.0001	23712932	4667492	19.6833	2048	45.01
partial		vtab-cifar(num_classes=100)	imagenet_sup_rn50	0.0025	0.0001	23712932	4667492	19.6833	2048	44.09
partial		vtab-cifar(num_classes=100)	imagenet_sup_rn50	0.0025	0.0001	23712932	4667492	19.6833	2048	44.27
partial		vtab-clevr(task="closest_object_distance")	imagenet22k_sup_rnx_base	0.001	0.001	87572614	8456198	9.6562	1024	43.44
partial		vtab-clevr(task="closest_object_distance")	imagenet22k_sup_rnx_base	0.001	0.001	87572614	8456198	9.6562	1024	41.35
partial		vtab-clevr(task="closest_object_distance")	imagenet22k_sup_rnx_base	0.001	0.001	87572614	8456198	9.6562	1024	42.53
partial		vtab-clevr(task="closest_object_distance")	imagenet_sup_rn50	0.5	0.0001	23520326	4474886	19.0256	2048	49.95
partial		vtab-clevr(task="closest_object_distance")	imagenet_sup_rn50	0.5	0.0001	23520326	4474886	19.0256	2048	56.79
partial		vtab-clevr(task="closest_object_distance")	imagenet_sup_rn50	0.5	0.0001	23520326	4474886	19.0256	2048	46.77
partial		vtab-clevr(task="count_all")	imagenet22k_sup_rnx_base	0.0005	0.0001	87574664	8458248	9.6583	1024	37.33
partial		vtab-clevr(task="count_all")	imagenet22k_sup_rnx_base	0.0005	0.0001	87574664	8458248	9.6583	1024	38.32
partial		vtab-clevr(task="count_all")	imagenet22k_sup_rnx_base	0.0005	0.0001	87574664	8458248	9.6583	1024	37.7
partial		vtab-clevr(task="count_all")	imagenet_sup_rn50	0.025	0.001	23524424	4478984	19.0397	2048	52.07
partial		vtab-clevr(task="count_all")	imagenet_sup_rn50	0.025	0.001	23524424	4478984	19.0397	2048	49.71
partial		vtab-clevr(task="count_all")	imagenet_sup_rn50	0.025	0.001	23524424	4478984	19.0397	2048	49.42
partial		vtab-diabetic_retinopathy(config="btgraham-300")	imagenet22k_sup_rnx_base	0.0005	0.0001	87571589	8455173	9.6552	1024	72.39
partial		vtab-diabetic_retinopathy(config="btgraham-300")	imagenet22k_sup_rnx_base	0.0005	0.0001	87571589	8455173	9.6552	1024	72.17
partial		vtab-diabetic_retinopathy(config="btgraham-300")	imagenet22k_sup_rnx_base	0.0005	0.0001	87571589	8455173	9.6552	1024	72.31
partial		vtab-diabetic_retinopathy(config="btgraham-300")	imagenet_sup_rn50	0.5	0.001	23518277	4472837	19.0186	2048	68.05
partial		vtab-diabetic_retinopathy(config="btgraham-300")	imagenet_sup_rn50	0.5	0.001	23518277	4472837	19.0186	2048	73.6
partial		vtab-diabetic_retinopathy(config="btgraham-300")	imagenet_sup_rn50	0.5	0.001	23518277	4472837	19.0186	2048	73.34
partial		vtab-dmlab	imagenet22k_sup_rnx_base	0.0005	0.0001	87572614	8456198	9.6562	1024	41.66
partial		vtab-dmlab	imagenet22k_sup_rnx_base	0.0005	0.0001	87572614	8456198	9.6562	1024	41.52
partial		vtab-dmlab	imagenet22k_sup_rnx_base	0.0005	0.0001	87572614	8456198	9.6562	1024	41.55
partial		vtab-dmlab	imagenet_sup_rn50	0.0025	0.0001	23520326	4474886	19.0256	2048	39.91
partial		vtab-dmlab	imagenet_sup_rn50	0.0025	0.0001	23520326	4474886	19.0256	2048	38.11
partial		vtab-dmlab	imagenet_sup_rn50	0.0025	0.0001	23520326	4474886	19.0256	2048	39.05
partial		vtab-dsprites(predicted_attribute="label_orientation",num_classes=16)	imagenet22k_sup_rnx_base	0.001	0.01	87582864	8466448	9.6668	1024	41.81
partial		vtab-dsprites(predicted_attribute="label_orientation",num_classes=16)	imagenet22k_sup_rnx_base	0.001	0.01	87582864	8466448	9.6668	1024	40.93
partial		vtab-dsprites(predicted_attribute="label_orientation",num_classes=16)	imagenet22k_sup_rnx_base	0.001	0.01	87582864	8466448	9.6668	1024	42.61
partial		vtab-dsprites(predicted_attribute="label_orientation",num_classes=16)	imagenet_sup_rn50	0.0025	0	23540816	4495376	19.0961	2048	41.21
partial		vtab-dsprites(predicted_attribute="label_orientation",num_classes=16)	imagenet_sup_rn50	0.0025	0	23540816	4495376	19.0961	2048	41.29
partial		vtab-dsprites(predicted_attribute="label_orientation",num_classes=16)	imagenet_sup_rn50	0.0025	0	23540816	4495376	19.0961	2048	41.76
partial		vtab-dsprites(predicted_attribute="label_x_position",num_classes=16)	imagenet22k_sup_rnx_base	0.0005	0.01	87582864	8466448	9.6668	1024	35.06
partial		vtab-dsprites(predicted_attribute="label_x_position",num_classes=16)	imagenet22k_sup_rnx_base	0.0005	0.01	87582864	8466448	9.6668	1024	38.54
partial		vtab-dsprites(predicted_attribute="label_x_position",num_classes=16)	imagenet22k_sup_rnx_base	0.0005	0.01	87582864	8466448	9.6668	1024	33.83
partial		vtab-dsprites(predicted_attribute="label_x_position",num_classes=16)	imagenet_sup_rn50	0.005	0	23540816	4495376	19.0961	2048	65.7
partial		vtab-dsprites(predicted_attribute="label_x_position",num_classes=16)	imagenet_sup_rn50	0.005	0	23540816	4495376	19.0961	2048	65.86
partial		vtab-dsprites(predicted_attribute="label_x_position",num_classes=16)	imagenet_sup_rn50	0.005	0	23540816	4495376	19.0961	2048	65.23
partial		vtab-dtd	imagenet22k_sup_rnx_base	0.001	0.0001	87614639	8498223	9.6995	1024	71.38
partial		vtab-dtd	imagenet22k_sup_rnx_base	0.001	0.0001	87614639	8498223	9.6995	1024	71.49
partial		vtab-dtd	imagenet22k_sup_rnx_base	0.001	0.0001	87614639	8498223	9.6995	1024	71.91
partial		vtab-dtd	imagenet_sup_rn50	0.25	0.01	23604335	4558895	19.3138	2048	62.18
partial		vtab-dtd	imagenet_sup_rn50	0.25	0.01	23604335	4558895	19.3138	2048	63.51
partial		vtab-dtd	imagenet_sup_rn50	0.25	0.01	23604335	4558895	19.3138	2048	63.03
partial		vtab-eurosat	imagenet22k_sup_rnx_base	0.0005	0.001	87576714	8460298	9.6604	1024	90.11
partial		vtab-eurosat	imagenet22k_sup_rnx_base	0.0005	0.001	87576714	8460298	9.6604	1024	90.48
partial		vtab-eurosat	imagenet22k_sup_rnx_base	0.0005	0.001	87576714	8460298	9.6604	1024	90.24
partial		vtab-eurosat	imagenet_sup_rn50	0.00025	0.0001	23528522	4483082	19.0538	2048	90.8
partial		vtab-eurosat	imagenet_sup_rn50	0.00025	0.0001	23528522	4483082	19.0538	2048	89.8
partial		vtab-eurosat	imagenet_sup_rn50	0.00025	0.0001	23528522	4483082	19.0538	2048	89.31
partial		vtab-eurosat	imagenet_sup_rn50	0.025	0.0001	23528522	4483082	19.0538	2048	91.09
partial		vtab-eurosat	imagenet_sup_rn50	0.025	0.0001	23528522	4483082	19.0538	2048	91.33
partial		vtab-eurosat	imagenet_sup_rn50	0.025	0.0001	23528522	4483082	19.0538	2048	90.81
partial		vtab-kitti(task="closest_vehicle_distance")	imagenet22k_sup_rnx_base	0.0005	0.01	87570564	8454148	9.6541	1024	69.76
partial		vtab-kitti(task="closest_vehicle_distance")	imagenet22k_sup_rnx_base	0.0005	0.01	87570564	8454148	9.6541	1024	71.17
partial		vtab-kitti(task="closest_vehicle_distance")	imagenet22k_sup_rnx_base	0.0005	0.01	87570564	8454148	9.6541	1024	73.28
partial		vtab-kitti(task="closest_vehicle_distance")	imagenet_sup_rn50	0.0005	0.01	23516228	4470788	19.0115	2048	64.7
partial		vtab-kitti(task="closest_vehicle_distance")	imagenet_sup_rn50	0.0005	0.01	23516228	4470788	19.0115	2048	68.78
partial		vtab-kitti(task="closest_vehicle_distance")	imagenet_sup_rn50	0.0005	0.01	23516228	4470788	19.0115	2048	63.71
partial		vtab-oxford_flowers102	imagenet22k_sup_rnx_base	0.0001	0.001	87671014	8554598	9.7576	1024	98.55
partial		vtab-oxford_flowers102	imagenet22k_sup_rnx_base	0.0001	0.001	87671014	8554598	9.7576	1024	98.55
partial		vtab-oxford_flowers102	imagenet22k_sup_rnx_base	0.0001	0.001	87671014	8554598	9.7576	1024	98.78
partial		vtab-oxford_flowers102	imagenet_sup_rn50	0.05	0.01	23717030	4671590	19.6972	2048	82.89
partial		vtab-oxford_flowers102	imagenet_sup_rn50	0.05	0.01	23717030	4671590	19.6972	2048	83.46
partial		vtab-oxford_flowers102	imagenet_sup_rn50	0.05	0.01	23717030	4671590	19.6972	2048	83.96
partial		vtab-oxford_iiit_pet	imagenet22k_sup_rnx_base	0.005	0.0001	87604389	8487973	9.689	1024	91.09
partial		vtab-oxford_iiit_pet	imagenet22k_sup_rnx_base	0.005	0.0001	87604389	8487973	9.689	1024	90.49
partial		vtab-oxford_iiit_pet	imagenet22k_sup_rnx_base	0.005	0.0001	87604389	8487973	9.689	1024	90.6
partial		vtab-oxford_iiit_pet	imagenet_sup_rn50	0.00025	0.01	23583845	4538405	19.2437	2048	86.67
partial		vtab-oxford_iiit_pet	imagenet_sup_rn50	0.00025	0.01	23583845	4538405	19.2437	2048	86.32
partial		vtab-oxford_iiit_pet	imagenet_sup_rn50	0.00025	0.01	23583845	4538405	19.2437	2048	86.02
partial		vtab-patch_camelyon	imagenet22k_sup_rnx_base	0.0005	0.0001	87568514	8452098	9.652	1024	82.63
partial		vtab-patch_camelyon	imagenet22k_sup_rnx_base	0.0005	0.0001	87568514	8452098	9.652	1024	82.6
partial		vtab-patch_camelyon	imagenet22k_sup_rnx_base	0.0005	0.0001	87568514	8452098	9.652	1024	82.96
partial		vtab-patch_camelyon	imagenet_sup_rn50	0.0005	0.001	23512130	4466690	18.9974	2048	77.87
partial		vtab-patch_camelyon	imagenet_sup_rn50	0.0005	0.001	23512130	4466690	18.9974	2048	78.78
partial		vtab-patch_camelyon	imagenet_sup_rn50	0.0005	0.001	23512130	4466690	18.9974	2048	78.96
partial		vtab-resisc45	imagenet22k_sup_rnx_base	0.001	0.0001	87612589	8496173	9.6974	1024	80.63
partial		vtab-resisc45	imagenet22k_sup_rnx_base	0.001	0.0001	87612589	8496173	9.6974	1024	81.46
partial		vtab-resisc45	imagenet22k_sup_rnx_base	0.001	0.0001	87612589	8496173	9.6974	1024	81.75
partial		vtab-resisc45	imagenet_sup_rn50	0.05	0.01	23600237	4554797	19.2998	2048	74.65
partial		vtab-resisc45	imagenet_sup_rn50	0.05	0.01	23600237	4554797	19.2998	2048	73.67
partial		vtab-resisc45	imagenet_sup_rn50	0.05	0.01	23600237	4554797	19.2998	2048	73.19
partial		vtab-smallnorb(predicted_attribute="label_azimuth")	imagenet22k_sup_rnx_base	0.0005	0.01	87584914	8468498	9.6689	1024	21.04
partial		vtab-smallnorb(predicted_attribute="label_azimuth")	imagenet22k_sup_rnx_base	0.0005	0.01	87584914	8468498	9.6689	1024	22.1
partial		vtab-smallnorb(predicted_attribute="label_azimuth")	imagenet22k_sup_rnx_base	0.0005	0.01	87584914	8468498	9.6689	1024	20.44
partial		vtab-smallnorb(predicted_attribute="label_azimuth")	imagenet_sup_rn50	0.005	0.01	23544914	4499474	19.1102	2048	23.18
partial		vtab-smallnorb(predicted_attribute="label_azimuth")	imagenet_sup_rn50	0.005	0.01	23544914	4499474	19.1102	2048	25.49
partial		vtab-smallnorb(predicted_attribute="label_azimuth")	imagenet_sup_rn50	0.005	0.01	23544914	4499474	19.1102	2048	23.68
partial		vtab-smallnorb(predicted_attribute="label_elevation")	imagenet22k_sup_rnx_base	0.005	0.0001	87575689	8459273	9.6594	1024	25.56
partial		vtab-smallnorb(predicted_attribute="label_elevation")	imagenet22k_sup_rnx_base	0.005	0.0001	87575689	8459273	9.6594	1024	26.42
partial		vtab-smallnorb(predicted_attribute="label_elevation")	imagenet22k_sup_rnx_base	0.005	0.0001	87575689	8459273	9.6594	1024	21.3
partial		vtab-smallnorb(predicted_attribute="label_elevation")	imagenet_sup_rn50	0.0005	0.01	23526473	4481033	19.0468	2048	27.65
partial		vtab-smallnorb(predicted_attribute="label_elevation")	imagenet_sup_rn50	0.0005	0.01	23526473	4481033	19.0468	2048	27
partial		vtab-smallnorb(predicted_attribute="label_elevation")	imagenet_sup_rn50	0.0005	0.01	23526473	4481033	19.0468	2048	27.46
partial		vtab-smallnorb(predicted_attribute="label_elevation")	imagenet_sup_rn50	0.005	0	23526473	4481033	19.0468	2048	29.31
partial		vtab-smallnorb(predicted_attribute="label_elevation")	imagenet_sup_rn50	0.005	0	23526473	4481033	19.0468	2048	30.5
partial		vtab-smallnorb(predicted_attribute="label_elevation")	imagenet_sup_rn50	0.005	0	23526473	4481033	19.0468	2048	30.56
partial		vtab-sun397	imagenet22k_sup_rnx_base	0.0005	0.01	87973389	8856973	10.0678	1024	54.51
partial		vtab-sun397	imagenet22k_sup_rnx_base	0.0005	0.01	87973389	8856973	10.0678	1024	55.11
partial		vtab-sun397	imagenet22k_sup_rnx_base	0.0005	0.01	87973389	8856973	10.0678	1024	54.75
partial		vtab-sun397	imagenet_sup_rn50	0.005	0.01	24321485	5276045	21.6929	2048	32.1
partial		vtab-sun397	imagenet_sup_rn50	0.005	0.01	24321485	5276045	21.6929	2048	32.3
partial		vtab-sun397	imagenet_sup_rn50	0.005	0.01	24321485	5276045	21.6929	2048	32.7
partial		vtab-svhn	imagenet22k_sup_rnx_base	0.005	0.01	87576714	8460298	9.6604	1024	51.83
partial		vtab-svhn	imagenet22k_sup_rnx_base	0.005	0.01	87576714	8460298	9.6604	1024	53.48
partial		vtab-svhn	imagenet22k_sup_rnx_base	0.005	0.01	87576714	8460298	9.6604	1024	49.78
partial		vtab-svhn	imagenet_sup_rn50	0.005	0.01	23528522	4483082	19.0538	2048	55.89
partial		vtab-svhn	imagenet_sup_rn50	0.005	0.01	23528522	4483082	19.0538	2048	56.22
partial		vtab-svhn	imagenet_sup_rn50	0.005	0.01	23528522	4483082	19.0538	2048	56.06
side		vtab-caltech101	imagenet22k_sup_rnx_base	25	0	99577895	12011431	12.0623	1024	86.93
side		vtab-caltech101	imagenet22k_sup_rnx_base	25	0	99577895	12011431	12.0623	1024	87.64
side		vtab-caltech101	imagenet22k_sup_rnx_base	25	0	99577895	12011431	12.0623	1024	87.16
side		vtab-caltech101	imagenet_sup_rn50	0.5	0.001	45061095	21553063	47.8308	2048	78.25
side		vtab-caltech101	imagenet_sup_rn50	0.5	0.001	45061095	21553063	47.8308	2048	67.37
side		vtab-caltech101	imagenet_sup_rn50	0.5	0.001	45061095	21553063	47.8308	2048	70.13
side		vtab-caltech101	sup_vitb16_imagenet21k	1	0.001	95424679	9626023	10.0876	2048	60.83
side		vtab-caltech101	swinb_imagenet22k_224	25	0	98754655	12011431	12.1629	1024	87.29
side		vtab-caltech101	swinb_imagenet22k_224	25	0	98754655	12011431	12.1629	1024	88.18
side		vtab-caltech101	swinb_imagenet22k_224	25	0	98754655	12011431	12.1629	1024	87.15
side		vtab-cifar(num_classes=100)	imagenet22k_sup_rnx_base	0.05	0.01	99575845	12009381	12.0605	1024	57.83
side		vtab-cifar(num_classes=100)	imagenet22k_sup_rnx_base	0.05	0.01	99575845	12009381	12.0605	1024	59.27
side		vtab-cifar(num_classes=100)	imagenet22k_sup_rnx_base	0.05	0.01	99575845	12009381	12.0605	1024	60.06
side		vtab-cifar(num_classes=100)	imagenet_sup_rn50	0.1	0.0001	45056997	21548965	47.826	2048	43.72
side		vtab-cifar(num_classes=100)	imagenet_sup_rn50	0.1	0.0001	45056997	21548965	47.826	2048	45.04
side		vtab-cifar(num_classes=100)	imagenet_sup_rn50	0.1	0.0001	45056997	21548965	47.826	2048	42.75
side		vtab-cifar(num_classes=100)	sup_vitb16_imagenet21k	25	0	95423141	9624485	10.0861	2048	59.84
side		vtab-cifar(num_classes=100)	sup_vitb16_imagenet21k	25	0	95423141	9624485	10.0861	2048	61.35
side		vtab-cifar(num_classes=100)	sup_vitb16_imagenet21k	25	0	95423141	9624485	10.0861	2048	60.9
side		vtab-cifar(num_classes=100)	swinb_imagenet22k_224	1	0.001	98752605	12009381	12.1611	1024	42.48
side		vtab-cifar(num_classes=100)	swinb_imagenet22k_224	1	0.001	98752605	12009381	12.1611	1024	55.59
side		vtab-cifar(num_classes=100)	swinb_imagenet22k_224	1	0.001	98752605	12009381	12.1611	1024	44.96
side		vtab-clevr(task="closest_object_distance")	imagenet22k_sup_rnx_base	25	0	99479495	11913031	11.9754	1024	24.51
side		vtab-clevr(task="closest_object_distance")	imagenet22k_sup_rnx_base	25	0	99479495	11913031	11.9754	1024	38.53
side		vtab-clevr(task="closest_object_distance")	imagenet22k_sup_rnx_base	25	0	99479495	11913031	11.9754	1024	38.13
side		vtab-clevr(task="closest_object_distance")	imagenet_sup_rn50	50	0	44864391	21356359	47.602	2048	34.45
side		vtab-clevr(task="closest_object_distance")	imagenet_sup_rn50	50	0	44864391	21356359	47.602	2048	33.68
side		vtab-clevr(task="closest_object_distance")	imagenet_sup_rn50	50	0	44864391	21356359	47.602	2048	33.5
side		vtab-clevr(task="closest_object_distance")	sup_vitb16_imagenet21k	0.05	0.01	95350855	9552199	10.0179	2048	24.55
side		vtab-clevr(task="closest_object_distance")	sup_vitb16_imagenet21k	0.05	0.01	95350855	9552199	10.0179	2048	23.24
side		vtab-clevr(task="closest_object_distance")	sup_vitb16_imagenet21k	0.05	0.01	95350855	9552199	10.0179	2048	20.13
side		vtab-clevr(task="closest_object_distance")	swinb_imagenet22k_224	0.1	0.01	98656255	11913031	12.0753	1024	28.23
side		vtab-clevr(task="closest_object_distance")	swinb_imagenet22k_224	0.1	0.01	98656255	11913031	12.0753	1024	34.65
side		vtab-clevr(task="closest_object_distance")	swinb_imagenet22k_224	0.1	0.01	98656255	11913031	12.0753	1024	26.08
side		vtab-clevr(task="count_all")	imagenet22k_sup_rnx_base	10	0	99481545	11915081	11.9772	1024	11.23
side		vtab-clevr(task="count_all")	imagenet22k_sup_rnx_base	10	0	99481545	11915081	11.9772	1024	12.41
side		vtab-clevr(task="count_all")	imagenet22k_sup_rnx_base	10	0	99481545	11915081	11.9772	1024	12.94
side		vtab-clevr(task="count_all")	imagenet_sup_rn50	50	0	44868489	21360457	47.6068	2048	33.27
side		vtab-clevr(task="count_all")	imagenet_sup_rn50	50	0	44868489	21360457	47.6068	2048	33.6
side		vtab-clevr(task="count_all")	imagenet_sup_rn50	50	0	44868489	21360457	47.6068	2048	34.09
side		vtab-clevr(task="count_all")	sup_vitb16_imagenet21k	0.05	0.01	95352393	9553737	10.0194	2048	22.81
side		vtab-clevr(task="count_all")	sup_vitb16_imagenet21k	0.05	0.01	95352393	9553737	10.0194	2048	29.52
side		vtab-clevr(task="count_all")	sup_vitb16_imagenet21k	0.05	0.01	95352393	9553737	10.0194	2048	30.41
side		vtab-clevr(task="count_all")	swinb_imagenet22k_224	50	0	98658305	11915081	12.0771	1024	12.27
side		vtab-clevr(task="count_all")	swinb_imagenet22k_224	50	0	98658305	11915081	12.0771	1024	12.94
side		vtab-clevr(task="count_all")	swinb_imagenet22k_224	50	0	98658305	11915081	12.0771	1024	39.06
side		vtab-diabetic_retinopathy(config="btgraham-300")	imagenet22k_sup_rnx_base	0.5	0.01	99478470	11912006	11.9745	1024	19.66
side		vtab-diabetic_retinopathy(config="btgraham-300")	imagenet22k_sup_rnx_base	0.5	0.01	99478470	11912006	11.9745	1024	73.6
side		vtab-diabetic_retinopathy(config="btgraham-300")	imagenet22k_sup_rnx_base	0.5	0.01	99478470	11912006	11.9745	1024	73.6
side		vtab-diabetic_retinopathy(config="btgraham-300")	imagenet_sup_rn50	0.05	0.0001	44862342	21354310	47.5996	2048	70.7
side		vtab-diabetic_retinopathy(config="btgraham-300")	imagenet_sup_rn50	0.05	0.0001	44862342	21354310	47.5996	2048	56.03
side		vtab-diabetic_retinopathy(config="btgraham-300")	imagenet_sup_rn50	0.05	0.0001	44862342	21354310	47.5996	2048	73.6
side		vtab-diabetic_retinopathy(config="btgraham-300")	imagenet_sup_rn50	0.1	0.01	44862342	21354310	47.5996	2048	21.66
side		vtab-diabetic_retinopathy(config="btgraham-300")	imagenet_sup_rn50	0.1	0.01	44862342	21354310	47.5996	2048	71.64
side		vtab-diabetic_retinopathy(config="btgraham-300")	imagenet_sup_rn50	0.1	0.01	44862342	21354310	47.5996	2048	28.54
side		vtab-diabetic_retinopathy(config="btgraham-300")	sup_vitb16_imagenet21k	0.1	0.001	95350086	9551430	10.0172	2048	72.49
side		vtab-diabetic_retinopathy(config="btgraham-300")	sup_vitb16_imagenet21k	0.1	0.001	95350086	9551430	10.0172	2048	73.51
side		vtab-diabetic_retinopathy(config="btgraham-300")	sup_vitb16_imagenet21k	0.1	0.001	95350086	9551430	10.0172	2048	36.98
side		vtab-diabetic_retinopathy(config="btgraham-300")	swinb_imagenet22k_224	0.25	0	98655230	11912006	12.0744	1024	48.86
side		vtab-diabetic_retinopathy(config="btgraham-300")	swinb_imagenet22k_224	0.25	0	98655230	11912006	12.0744	1024	62.49
side		vtab-diabetic_retinopathy(config="btgraham-300")	swinb_imagenet22k_224	0.25	0	98655230	11912006	12.0744	1024	72.28
side		vtab-dmlab	imagenet22k_sup_rnx_base	50	0	99479495	11913031	11.9754	1024	40.45
side		vtab-dmlab	imagenet22k_sup_rnx_base	50	0	99479495	11913031	11.9754	1024	39.88
side		vtab-dmlab	imagenet22k_sup_rnx_base	50	0	99479495	11913031	11.9754	1024	40.69
side		vtab-dmlab	imagenet_sup_rn50	10	0	44864391	21356359	47.602	2048	15.33
side		vtab-dmlab	imagenet_sup_rn50	10	0	44864391	21356359	47.602	2048	22.19
side		vtab-dmlab	imagenet_sup_rn50	10	0	44864391	21356359	47.602	2048	37.11
side		vtab-dmlab	sup_vitb16_imagenet21k	50	0	95350855	9552199	10.0179	2048	31.28
side		vtab-dmlab	sup_vitb16_imagenet21k	50	0	95350855	9552199	10.0179	2048	32.21
side		vtab-dmlab	sup_vitb16_imagenet21k	50	0	95350855	9552199	10.0179	2048	30.29
side		vtab-dmlab	swinb_imagenet22k_224	10	0.0001	98656255	11913031	12.0753	1024	17.31
side		vtab-dmlab	swinb_imagenet22k_224	10	0.0001	98656255	11913031	12.0753	1024	40.14
side		vtab-dmlab	swinb_imagenet22k_224	10	0.0001	98656255	11913031	12.0753	1024	40.56
side		vtab-dsprites(predicted_attribute="label_orientation",num_classes=16)	imagenet22k_sup_rnx_base	0.1	0.01	99489745	11923281	11.9844	1024	33.37
side		vtab-dsprites(predicted_attribute="label_orientation",num_classes=16)	imagenet22k_sup_rnx_base	0.1	0.01	99489745	11923281	11.9844	1024	33.48
side		vtab-dsprites(predicted_attribute="label_orientation",num_classes=16)	imagenet22k_sup_rnx_base	0.1	0.01	99489745	11923281	11.9844	1024	34.52
side		vtab-dsprites(predicted_attribute="label_orientation",num_classes=16)	imagenet_sup_rn50	50	0	44884881	21376849	47.6259	2048	7.6
side		vtab-dsprites(predicted_attribute="label_orientation",num_classes=16)	imagenet_sup_rn50	50	0	44884881	21376849	47.6259	2048	20.05
side		vtab-dsprites(predicted_attribute="label_orientation",num_classes=16)	imagenet_sup_rn50	50	0	44884881	21376849	47.6259	2048	7.5
side		vtab-dsprites(predicted_attribute="label_orientation",num_classes=16)	sup_vitb16_imagenet21k	0.1	0.0001	95358545	9559889	10.0252	2048	16.06
side		vtab-dsprites(predicted_attribute="label_orientation",num_classes=16)	sup_vitb16_imagenet21k	0.1	0.0001	95358545	9559889	10.0252	2048	12.84
side		vtab-dsprites(predicted_attribute="label_orientation",num_classes=16)	sup_vitb16_imagenet21k	0.1	0.0001	95358545	9559889	10.0252	2048	14.17
side		vtab-dsprites(predicted_attribute="label_orientation",num_classes=16)	swinb_imagenet22k_224	0.1	0.01	98666505	11923281	12.0844	1024	24.81
side		vtab-dsprites(predicted_attribute="label_orientation",num_classes=16)	swinb_imagenet22k_224	0.1	0.01	98666505	11923281	12.0844	1024	6.42
side		vtab-dsprites(predicted_attribute="label_orientation",num_classes=16)	swinb_imagenet22k_224	0.1	0.01	98666505	11923281	12.0844	1024	24.21
side		vtab-dsprites(predicted_attribute="label_x_position",num_classes=16)	imagenet22k_sup_rnx_base	0.1	0.01	99489745	11923281	11.9844	1024	6.23
side		vtab-dsprites(predicted_attribute="label_x_position",num_classes=16)	imagenet22k_sup_rnx_base	0.1	0.01	99489745	11923281	11.9844	1024	15.86
side		vtab-dsprites(predicted_attribute="label_x_position",num_classes=16)	imagenet22k_sup_rnx_base	0.1	0.01	99489745	11923281	11.9844	1024	6.36
side		vtab-dsprites(predicted_attribute="label_x_position",num_classes=16)	imagenet_sup_rn50	10	0	44884881	21376849	47.6259	2048	6.35
side		vtab-dsprites(predicted_attribute="label_x_position",num_classes=16)	imagenet_sup_rn50	10	0	44884881	21376849	47.6259	2048	6.21
side		vtab-dsprites(predicted_attribute="label_x_position",num_classes=16)	imagenet_sup_rn50	10	0	44884881	21376849	47.6259	2048	20.54
side		vtab-dsprites(predicted_attribute="label_x_position",num_classes=16)	sup_vitb16_imagenet21k	10	0	95358545	9559889	10.0252	2048	12.14
side		vtab-dsprites(predicted_attribute="label_x_position",num_classes=16)	sup_vitb16_imagenet21k	10	0	95358545	9559889	10.0252	2048	6.16
side		vtab-dsprites(predicted_attribute="label_x_position",num_classes=16)	sup_vitb16_imagenet21k	10	0	95358545	9559889	10.0252	2048	6.17
side		vtab-dsprites(predicted_attribute="label_x_position",num_classes=16)	swinb_imagenet22k_224	0.1	0.01	98666505	11923281	12.0844	1024	19.37
side		vtab-dsprites(predicted_attribute="label_x_position",num_classes=16)	swinb_imagenet22k_224	0.1	0.01	98666505	11923281	12.0844	1024	5.38
side		vtab-dsprites(predicted_attribute="label_x_position",num_classes=16)	swinb_imagenet22k_224	0.1	0.01	98666505	11923281	12.0844	1024	17.88
side		vtab-dtd	imagenet22k_sup_rnx_base	10	0	99521520	11955056	12.0125	1024	14.73
side		vtab-dtd	imagenet22k_sup_rnx_base	10	0	99521520	11955056	12.0125	1024	1.17
side		vtab-dtd	imagenet22k_sup_rnx_base	10	0	99521520	11955056	12.0125	1024	15.85
side		vtab-dtd	imagenet_sup_rn50	25	0	44948400	21440368	47.7	2048	59.95
side		vtab-dtd	imagenet_sup_rn50	25	0	44948400	21440368	47.7	2048	61.17
side		vtab-dtd	imagenet_sup_rn50	25	0	44948400	21440368	47.7	2048	59.57
side		vtab-dtd	sup_vitb16_imagenet21k	10	0	95382384	9583728	10.0477	2048	54.1
side		vtab-dtd	sup_vitb16_imagenet21k	10	0	95382384	9583728	10.0477	2048	52.98
side		vtab-dtd	sup_vitb16_imagenet21k	10	0	95382384	9583728	10.0477	2048	53.62
side		vtab-dtd	swinb_imagenet22k_224	50	0	98698280	11955056	12.1127	1024	70.64
side		vtab-dtd	swinb_imagenet22k_224	50	0	98698280	11955056	12.1127	1024	70.96
side		vtab-dtd	swinb_imagenet22k_224	50	0	98698280	11955056	12.1127	1024	70
side		vtab-eurosat	imagenet22k_sup_rnx_base	0.1	0.01	99483595	11917131	11.979	1024	18.2
side		vtab-eurosat	imagenet22k_sup_rnx_base	0.1	0.01	99483595	11917131	11.979	1024	87.56
side		vtab-eurosat	imagenet22k_sup_rnx_base	0.1	0.01	99483595	11917131	11.979	1024	86.19
side		vtab-eurosat	imagenet_sup_rn50	0.05	0	44872587	21364555	47.6116	2048	86.46
side		vtab-eurosat	imagenet_sup_rn50	0.05	0	44872587	21364555	47.6116	2048	78.7
side		vtab-eurosat	imagenet_sup_rn50	0.05	0	44872587	21364555	47.6116	2048	82.11
side		vtab-eurosat	sup_vitb16_imagenet21k	50	0	95353931	9555275	10.0209	2048	88.22
side		vtab-eurosat	sup_vitb16_imagenet21k	50	0	95353931	9555275	10.0209	2048	87.74
side		vtab-eurosat	sup_vitb16_imagenet21k	50	0	95353931	9555275	10.0209	2048	87.26
side		vtab-eurosat	swinb_imagenet22k_224	0.1	0.01	98660355	11917131	12.0789	1024	85.98
side		vtab-eurosat	swinb_imagenet22k_224	0.1	0.01	98660355	11917131	12.0789	1024	89.78
side		vtab-eurosat	swinb_imagenet22k_224	0.1	0.01	98660355	11917131	12.0789	1024	87.91
side		vtab-kitti(task="closest_vehicle_distance")	imagenet22k_sup_rnx_base	10	0	99477445	11910981	11.9735	1024	68.78
side		vtab-kitti(task="closest_vehicle_distance")	imagenet22k_sup_rnx_base	10	0	99477445	11910981	11.9735	1024	62.45
side		vtab-kitti(task="closest_vehicle_distance")	imagenet22k_sup_rnx_base	10	0	99477445	11910981	11.9735	1024	64.14
side		vtab-kitti(task="closest_vehicle_distance")	imagenet_sup_rn50	5	0.0001	44860293	21352261	47.5972	2048	61.74
side		vtab-kitti(task="closest_vehicle_distance")	imagenet_sup_rn50	5	0.0001	44860293	21352261	47.5972	2048	61.6
side		vtab-kitti(task="closest_vehicle_distance")	imagenet_sup_rn50	5	0.0001	44860293	21352261	47.5972	2048	62.31
side		vtab-kitti(task="closest_vehicle_distance")	sup_vitb16_imagenet21k	5	0.0001	95349317	9550661	10.0165	2048	49.79
side		vtab-kitti(task="closest_vehicle_distance")	sup_vitb16_imagenet21k	5	0.0001	95349317	9550661	10.0165	2048	52.88
side		vtab-kitti(task="closest_vehicle_distance")	sup_vitb16_imagenet21k	5	0.0001	95349317	9550661	10.0165	2048	53.02
side		vtab-kitti(task="closest_vehicle_distance")	sup_vitb16_imagenet21k	25	0	95349317	9550661	10.0165	2048	50.63
side		vtab-kitti(task="closest_vehicle_distance")	sup_vitb16_imagenet21k	25	0	95349317	9550661	10.0165	2048	51.2
side		vtab-kitti(task="closest_vehicle_distance")	sup_vitb16_imagenet21k	25	0	95349317	9550661	10.0165	2048	52.74
side		vtab-kitti(task="closest_vehicle_distance")	swinb_imagenet22k_224	10	0.0001	98654205	11910981	12.0735	1024	63.15
side		vtab-kitti(task="closest_vehicle_distance")	swinb_imagenet22k_224	10	0.0001	98654205	11910981	12.0735	1024	31.5
side		vtab-kitti(task="closest_vehicle_distance")	swinb_imagenet22k_224	10	0.0001	98654205	11910981	12.0735	1024	37.27
side		vtab-oxford_flowers102	imagenet22k_sup_rnx_base	10	0	99577895	12011431	12.0623	1024	98.44
side		vtab-oxford_flowers102	imagenet22k_sup_rnx_base	10	0	99577895	12011431	12.0623	1024	97.95
side		vtab-oxford_flowers102	imagenet22k_sup_rnx_base	10	0	99577895	12011431	12.0623	1024	26.38
side		vtab-oxford_flowers102	imagenet_sup_rn50	0.05	0.01	45061095	21553063	47.8308	2048	0.59
side		vtab-oxford_flowers102	imagenet_sup_rn50	0.05	0.01	45061095	21553063	47.8308	2048	68.04
side		vtab-oxford_flowers102	imagenet_sup_rn50	0.05	0.01	45061095	21553063	47.8308	2048	0.47
side		vtab-oxford_flowers102	sup_vitb16_imagenet21k	0.25	0.001	95424679	9626023	10.0876	2048	95.54
side		vtab-oxford_flowers102	swinb_imagenet22k_224	25	0	98754655	12011431	12.1629	1024	98.31
side		vtab-oxford_flowers102	swinb_imagenet22k_224	25	0	98754655	12011431	12.1629	1024	97.32
side		vtab-oxford_flowers102	swinb_imagenet22k_224	25	0	98754655	12011431	12.1629	1024	96.89
side		vtab-oxford_flowers102	swinb_imagenet22k_224	50	0	98754655	12011431	12.1629	1024	98.11
side		vtab-oxford_flowers102	swinb_imagenet22k_224	50	0	98754655	12011431	12.1629	1024	97.97
side		vtab-oxford_flowers102	swinb_imagenet22k_224	50	0	98754655	12011431	12.1629	1024	97.67
side		vtab-oxford_iiit_pet	imagenet22k_sup_rnx_base	10	0	99511270	11944806	12.0035	1024	89.04
side		vtab-oxford_iiit_pet	imagenet22k_sup_rnx_base	10	0	99511270	11944806	12.0035	1024	86.35
side		vtab-oxford_iiit_pet	imagenet22k_sup_rnx_base	10	0	99511270	11944806	12.0035	1024	88.17
side		vtab-oxford_iiit_pet	imagenet_sup_rn50	2.5	0	44927910	21419878	47.6761	2048	87.24
side		vtab-oxford_iiit_pet	imagenet_sup_rn50	2.5	0	44927910	21419878	47.6761	2048	85.58
side		vtab-oxford_iiit_pet	imagenet_sup_rn50	2.5	0	44927910	21419878	47.6761	2048	85.75
side		vtab-oxford_iiit_pet	imagenet_sup_rn50	5	0.0001	44927910	21419878	47.6761	2048	85.34
side		vtab-oxford_iiit_pet	imagenet_sup_rn50	5	0.0001	44927910	21419878	47.6761	2048	83.57
side		vtab-oxford_iiit_pet	imagenet_sup_rn50	5	0.0001	44927910	21419878	47.6761	2048	84.98
side		vtab-oxford_iiit_pet	sup_vitb16_imagenet21k	2.5	0	95374694	9576038	10.0404	2048	82.64
side		vtab-oxford_iiit_pet	sup_vitb16_imagenet21k	2.5	0	95374694	9576038	10.0404	2048	35.3
side		vtab-oxford_iiit_pet	sup_vitb16_imagenet21k	2.5	0	95374694	9576038	10.0404	2048	82.07
side		vtab-oxford_iiit_pet	swinb_imagenet22k_224	10	0.0001	98688030	11944806	12.1036	1024	86.18
side		vtab-oxford_iiit_pet	swinb_imagenet22k_224	10	0.0001	98688030	11944806	12.1036	1024	87.22
side		vtab-oxford_iiit_pet	swinb_imagenet22k_224	10	0.0001	98688030	11944806	12.1036	1024	85.75
side		vtab-patch_camelyon	imagenet22k_sup_rnx_base	50	0	99475395	11908931	11.9717	1024	82.98
side		vtab-patch_camelyon	imagenet22k_sup_rnx_base	50	0	99475395	11908931	11.9717	1024	82.44
side		vtab-patch_camelyon	imagenet22k_sup_rnx_base	50	0	99475395	11908931	11.9717	1024	81.22
side		vtab-patch_camelyon	imagenet_sup_rn50	25	0	44856195	21348163	47.5925	2048	50.02
side		vtab-patch_camelyon	imagenet_sup_rn50	25	0	44856195	21348163	47.5925	2048	50.02
side		vtab-patch_camelyon	imagenet_sup_rn50	25	0	44856195	21348163	47.5925	2048	77.49
side		vtab-patch_camelyon	sup_vitb16_imagenet21k	5	0.0001	95347779	9549123	10.015	2048	49.98
side		vtab-patch_camelyon	sup_vitb16_imagenet21k	5	0.0001	95347779	9549123	10.015	2048	49.98
side		vtab-patch_camelyon	sup_vitb16_imagenet21k	5	0.0001	95347779	9549123	10.015	2048	75.55
side		vtab-patch_camelyon	swinb_imagenet22k_224	25	0	98652155	11908931	12.0716	1024	82.12
side		vtab-patch_camelyon	swinb_imagenet22k_224	25	0	98652155	11908931	12.0716	1024	50.02
side		vtab-patch_camelyon	swinb_imagenet22k_224	25	0	98652155	11908931	12.0716	1024	49.98
side		vtab-resisc45	imagenet22k_sup_rnx_base	50	0	99519470	11953006	12.0107	1024	77.83
side		vtab-resisc45	imagenet22k_sup_rnx_base	50	0	99519470	11953006	12.0107	1024	78.89
side		vtab-resisc45	imagenet22k_sup_rnx_base	50	0	99519470	11953006	12.0107	1024	78.35
side		vtab-resisc45	imagenet_sup_rn50	25	0	44944302	21436270	47.6952	2048	71.27
side		vtab-resisc45	imagenet_sup_rn50	25	0	44944302	21436270	47.6952	2048	70.73
side		vtab-resisc45	imagenet_sup_rn50	25	0	44944302	21436270	47.6952	2048	70.54
side		vtab-resisc45	imagenet_sup_rn50	50	0	44944302	21436270	47.6952	2048	71.08
side		vtab-resisc45	imagenet_sup_rn50	50	0	44944302	21436270	47.6952	2048	70.54
side		vtab-resisc45	imagenet_sup_rn50	50	0	44944302	21436270	47.6952	2048	71.4
side		vtab-resisc45	sup_vitb16_imagenet21k	50	0	95380846	9582190	10.0462	2048	65.54
side		vtab-resisc45	sup_vitb16_imagenet21k	50	0	95380846	9582190	10.0462	2048	64.94
side		vtab-resisc45	sup_vitb16_imagenet21k	50	0	95380846	9582190	10.0462	2048	65.22
side		vtab-resisc45	swinb_imagenet22k_224	0.1	0.01	98696230	11953006	12.1109	1024	60.29
side		vtab-resisc45	swinb_imagenet22k_224	0.1	0.01	98696230	11953006	12.1109	1024	66.4
side		vtab-resisc45	swinb_imagenet22k_224	0.1	0.01	98696230	11953006	12.1109	1024	63.57
side		vtab-smallnorb(predicted_attribute="label_azimuth")	imagenet22k_sup_rnx_base	0.5	0	99491795	11925331	11.9862	1024	6.39
side		vtab-smallnorb(predicted_attribute="label_azimuth")	imagenet22k_sup_rnx_base	0.5	0	99491795	11925331	11.9862	1024	7.55
side		vtab-smallnorb(predicted_attribute="label_azimuth")	imagenet22k_sup_rnx_base	0.5	0	99491795	11925331	11.9862	1024	5.65
side		vtab-smallnorb(predicted_attribute="label_azimuth")	imagenet_sup_rn50	0.05	0.001	44888979	21380947	47.6307	2048	5.23
side		vtab-smallnorb(predicted_attribute="label_azimuth")	imagenet_sup_rn50	0.05	0.001	44888979	21380947	47.6307	2048	14.28
side		vtab-smallnorb(predicted_attribute="label_azimuth")	imagenet_sup_rn50	0.05	0.001	44888979	21380947	47.6307	2048	14.27
side		vtab-smallnorb(predicted_attribute="label_azimuth")	sup_vitb16_imagenet21k	0.25	0	95360083	9561427	10.0267	2048	11.09
side		vtab-smallnorb(predicted_attribute="label_azimuth")	sup_vitb16_imagenet21k	0.25	0	95360083	9561427	10.0267	2048	12.02
side		vtab-smallnorb(predicted_attribute="label_azimuth")	sup_vitb16_imagenet21k	0.25	0	95360083	9561427	10.0267	2048	6.26
side		vtab-smallnorb(predicted_attribute="label_azimuth")	swinb_imagenet22k_224	0.5	0.001	98668555	11925331	12.0863	1024	5.36
side		vtab-smallnorb(predicted_attribute="label_azimuth")	swinb_imagenet22k_224	0.5	0.001	98668555	11925331	12.0863	1024	6.35
side		vtab-smallnorb(predicted_attribute="label_azimuth")	swinb_imagenet22k_224	0.5	0.001	98668555	11925331	12.0863	1024	11.64
side		vtab-smallnorb(predicted_attribute="label_elevation")	imagenet22k_sup_rnx_base	0.1	0.01	99482570	11916106	11.9781	1024	25.37
side		vtab-smallnorb(predicted_attribute="label_elevation")	imagenet22k_sup_rnx_base	0.1	0.01	99482570	11916106	11.9781	1024	22.97
side		vtab-smallnorb(predicted_attribute="label_elevation")	imagenet22k_sup_rnx_base	0.1	0.01	99482570	11916106	11.9781	1024	24.58
side		vtab-smallnorb(predicted_attribute="label_elevation")	imagenet_sup_rn50	0.05	0.01	44870538	21362506	47.6092	2048	22.29
side		vtab-smallnorb(predicted_attribute="label_elevation")	imagenet_sup_rn50	0.05	0.01	44870538	21362506	47.6092	2048	21.9
side		vtab-smallnorb(predicted_attribute="label_elevation")	imagenet_sup_rn50	0.05	0.01	44870538	21362506	47.6092	2048	18.98
side		vtab-smallnorb(predicted_attribute="label_elevation")	sup_vitb16_imagenet21k	10	0	95353162	9554506	10.0201	2048	21.76
side		vtab-smallnorb(predicted_attribute="label_elevation")	sup_vitb16_imagenet21k	10	0	95353162	9554506	10.0201	2048	21.64
side		vtab-smallnorb(predicted_attribute="label_elevation")	sup_vitb16_imagenet21k	10	0	95353162	9554506	10.0201	2048	21.47
side		vtab-smallnorb(predicted_attribute="label_elevation")	sup_vitb16_imagenet21k	25	0	95353162	9554506	10.0201	2048	21.65
side		vtab-smallnorb(predicted_attribute="label_elevation")	sup_vitb16_imagenet21k	25	0	95353162	9554506	10.0201	2048	22.14
side		vtab-smallnorb(predicted_attribute="label_elevation")	sup_vitb16_imagenet21k	25	0	95353162	9554506	10.0201	2048	21.92
side		vtab-smallnorb(predicted_attribute="label_elevation")	swinb_imagenet22k_224	50	0	98659330	11916106	12.078	1024	10.97
side		vtab-smallnorb(predicted_attribute="label_elevation")	swinb_imagenet22k_224	50	0	98659330	11916106	12.078	1024	11.14
side		vtab-smallnorb(predicted_attribute="label_elevation")	swinb_imagenet22k_224	50	0	98659330	11916106	12.078	1024	11.22
side		vtab-sun397	imagenet22k_sup_rnx_base	50	0	99880270	12313806	12.3286	1024	48.18
side		vtab-sun397	imagenet22k_sup_rnx_base	50	0	99880270	12313806	12.3286	1024	47.31
side		vtab-sun397	imagenet22k_sup_rnx_base	50	0	99880270	12313806	12.3286	1024	48.04
side		vtab-sun397	imagenet_sup_rn50	0.1	0	45665550	22157518	48.5213	2048	0.31
side		vtab-sun397	imagenet_sup_rn50	0.1	0	45665550	22157518	48.5213	2048	1.88
side		vtab-sun397	imagenet_sup_rn50	0.1	0	45665550	22157518	48.5213	2048	1.09
side		vtab-sun397	sup_vitb16_imagenet21k	0.1	0.0001	95651534	9852878	10.3008	2048	17.57
side		vtab-sun397	sup_vitb16_imagenet21k	0.1	0.0001	95651534	9852878	10.3008	2048	49.33
side		vtab-sun397	sup_vitb16_imagenet21k	0.1	0.0001	95651534	9852878	10.3008	2048	38.85
side		vtab-sun397	swinb_imagenet22k_224	0.1	0	99057030	12313806	12.431	1024	19.35
side		vtab-sun397	swinb_imagenet22k_224	0.1	0	99057030	12313806	12.431	1024	18.18
side		vtab-sun397	swinb_imagenet22k_224	0.1	0	99057030	12313806	12.431	1024	42.79
side		vtab-svhn	imagenet22k_sup_rnx_base	0.05	0.01	99483595	11917131	11.979	1024	43.56
side		vtab-svhn	imagenet22k_sup_rnx_base	0.05	0.01	99483595	11917131	11.979	1024	35.03
side		vtab-svhn	imagenet22k_sup_rnx_base	0.05	0.01	99483595	11917131	11.979	1024	40.71
side		vtab-svhn	imagenet_sup_rn50	0.05	0.001	44872587	21364555	47.6116	2048	21.06
side		vtab-svhn	imagenet_sup_rn50	0.05	0.001	44872587	21364555	47.6116	2048	22.53
side		vtab-svhn	imagenet_sup_rn50	0.05	0.001	44872587	21364555	47.6116	2048	27.44
side		vtab-svhn	sup_vitb16_imagenet21k	25	0	95353931	9555275	10.0209	2048	34.37
side		vtab-svhn	sup_vitb16_imagenet21k	25	0	95353931	9555275	10.0209	2048	35.18
side		vtab-svhn	sup_vitb16_imagenet21k	25	0	95353931	9555275	10.0209	2048	35.22
side		vtab-svhn	swinb_imagenet22k_224	0.05	0.001	98660355	11917131	12.0789	1024	35.3
side		vtab-svhn	swinb_imagenet22k_224	0.05	0.001	98660355	11917131	12.0789	1024	31.88
side		vtab-svhn	swinb_imagenet22k_224	0.05	0.001	98660355	11917131	12.0789	1024	35.52
mlp_1		vtab-caltech101	imagenet22k_sup_rnx_base	0.5	0.01	88722662	1156198	1.3032	1024	90.52
mlp_1		vtab-caltech101	imagenet22k_sup_rnx_base	0.5	0.01	88722662	1156198	1.3032	1024	90.8
mlp_1		vtab-caltech101	imagenet22k_sup_rnx_base	0.5	0.01	88722662	1156198	1.3032	1024	90.43
mlp_1		vtab-caltech101	imagenet_sup_rn50	0.1	0.0001	27917478	4409446	15.7946	2048	84.4
mlp_1		vtab-caltech101	imagenet_sup_rn50	0.1	0.0001	27917478	4409446	15.7946	2048	83.05
mlp_1		vtab-caltech101	imagenet_sup_rn50	0.1	0.0001	27917478	4409446	15.7946	2048	83.42
mlp_1		vtab-caltech101	sup_vitb16_imagenet21k	0.1	0.01	86469222	670566	0.7755	2048	85.06
mlp_1		vtab-caltech101	sup_vitb16_imagenet21k	0.1	0.01	86469222	670566	0.7755	2048	84.76
mlp_1		vtab-caltech101	sup_vitb16_imagenet21k	0.1	0.01	86469222	670566	0.7755	2048	84.66
mlp_1		vtab-caltech101	swinb_imagenet22k_224	0.05	0.01	87899422	1156198	1.3154	1024	89.58
mlp_1		vtab-caltech101	swinb_imagenet22k_224	0.05	0.01	87899422	1156198	1.3154	1024	89.58
mlp_1		vtab-caltech101	swinb_imagenet22k_224	0.05	0.01	87899422	1156198	1.3154	1024	89.41
mlp_1		vtab-cifar(num_classes=100)	imagenet22k_sup_rnx_base	0.25	0.01	88720612	1154148	1.3009	1024	65.84
mlp_1		vtab-cifar(num_classes=100)	imagenet22k_sup_rnx_base	0.25	0.01	88720612	1154148	1.3009	1024	65.61
mlp_1		vtab-cifar(num_classes=100)	imagenet22k_sup_rnx_base	0.25	0.01	88720612	1154148	1.3009	1024	65.84
mlp_1		vtab-cifar(num_classes=100)	imagenet_sup_rn50	0.1	0.01	27913380	4405348	15.7822	2048	48.25
mlp_1		vtab-cifar(num_classes=100)	imagenet_sup_rn50	0.1	0.01	27913380	4405348	15.7822	2048	48.38
mlp_1		vtab-cifar(num_classes=100)	imagenet_sup_rn50	0.1	0.01	27913380	4405348	15.7822	2048	47.75
mlp_1		vtab-cifar(num_classes=100)	sup_vitb16_imagenet21k	0.25	0.01	86467684	669028	0.7737	2048	63.26
mlp_1		vtab-cifar(num_classes=100)	sup_vitb16_imagenet21k	0.25	0.01	86467684	669028	0.7737	2048	63.41
mlp_1		vtab-cifar(num_classes=100)	sup_vitb16_imagenet21k	0.25	0.01	86467684	669028	0.7737	2048	62.96
mlp_1		vtab-cifar(num_classes=100)	swinb_imagenet22k_224	0.5	0.01	87897372	1154148	1.3131	1024	62.19
mlp_1		vtab-cifar(num_classes=100)	swinb_imagenet22k_224	0.5	0.01	87897372	1154148	1.3131	1024	62.04
mlp_1		vtab-cifar(num_classes=100)	swinb_imagenet22k_224	0.5	0.01	87897372	1154148	1.3131	1024	62.14
mlp_1		vtab-clevr(task="closest_object_distance")	imagenet22k_sup_rnx_base	0.5	0	88624262	1057798	1.1936	1024	41.77
mlp_1		vtab-clevr(task="closest_object_distance")	imagenet22k_sup_rnx_base	0.5	0	88624262	1057798	1.1936	1024	32.21
mlp_1		vtab-clevr(task="closest_object_distance")	imagenet22k_sup_rnx_base	0.5	0	88624262	1057798	1.1936	1024	37.31
mlp_1		vtab-clevr(task="closest_object_distance")	imagenet_sup_rn50	0.05	0.01	27720774	4212742	15.1971	2048	38.88
mlp_1		vtab-clevr(task="closest_object_distance")	imagenet_sup_rn50	0.05	0.01	27720774	4212742	15.1971	2048	37.41
mlp_1		vtab-clevr(task="closest_object_distance")	imagenet_sup_rn50	0.05	0.01	27720774	4212742	15.1971	2048	37.94
mlp_1		vtab-clevr(task="closest_object_distance")	sup_vitb16_imagenet21k	0.05	0	86395398	596742	0.6907	2048	31.53
mlp_1		vtab-clevr(task="closest_object_distance")	sup_vitb16_imagenet21k	0.05	0	86395398	596742	0.6907	2048	31.32
mlp_1		vtab-clevr(task="closest_object_distance")	sup_vitb16_imagenet21k	0.05	0	86395398	596742	0.6907	2048	32.79
mlp_1		vtab-clevr(task="closest_object_distance")	sup_vitb16_imagenet21k	0.1	0	86395398	596742	0.6907	2048	31.32
mlp_1		vtab-clevr(task="closest_object_distance")	sup_vitb16_imagenet21k	0.1	0	86395398	596742	0.6907	2048	31.37
mlp_1		vtab-clevr(task="closest_object_distance")	sup_vitb16_imagenet21k	0.1	0	86395398	596742	0.6907	2048	31.03
mlp_1		vtab-clevr(task="closest_object_distance")	swinb_imagenet22k_224	0.25	0.0001	87801022	1057798	1.2048	1024	37.58
mlp_1		vtab-clevr(task="closest_object_distance")	swinb_imagenet22k_224	0.25	0.0001	87801022	1057798	1.2048	1024	39.27
mlp_1		vtab-clevr(task="closest_object_distance")	swinb_imagenet22k_224	0.25	0.0001	87801022	1057798	1.2048	1024	38.47
mlp_1		vtab-clevr(task="count_all")	imagenet22k_sup_rnx_base	0.5	0.001	88626312	1059848	1.1959	1024	45.16
mlp_1		vtab-clevr(task="count_all")	imagenet22k_sup_rnx_base	0.5	0.001	88626312	1059848	1.1959	1024	44.56
mlp_1		vtab-clevr(task="count_all")	imagenet22k_sup_rnx_base	0.5	0.001	88626312	1059848	1.1959	1024	43.23
mlp_1		vtab-clevr(task="count_all")	imagenet_sup_rn50	0.05	0	27724872	4216840	15.2096	2048	42.98
mlp_1		vtab-clevr(task="count_all")	imagenet_sup_rn50	0.05	0	27724872	4216840	15.2096	2048	43.39
mlp_1		vtab-clevr(task="count_all")	imagenet_sup_rn50	0.05	0	27724872	4216840	15.2096	2048	44.43
mlp_1		vtab-clevr(task="count_all")	sup_vitb16_imagenet21k	0.1	0.0001	86396936	598280	0.6925	2048	45.41
mlp_1		vtab-clevr(task="count_all")	sup_vitb16_imagenet21k	0.1	0.0001	86396936	598280	0.6925	2048	44.03
mlp_1		vtab-clevr(task="count_all")	sup_vitb16_imagenet21k	0.1	0.0001	86396936	598280	0.6925	2048	46.23
mlp_1		vtab-clevr(task="count_all")	swinb_imagenet22k_224	0.25	0	87803072	1059848	1.2071	1024	49.36
mlp_1		vtab-clevr(task="count_all")	swinb_imagenet22k_224	0.25	0	87803072	1059848	1.2071	1024	48.93
mlp_1		vtab-clevr(task="count_all")	swinb_imagenet22k_224	0.25	0	87803072	1059848	1.2071	1024	50.46
mlp_1		vtab-diabetic_retinopathy(config="btgraham-300")	imagenet22k_sup_rnx_base	0.1	0.01	88623237	1056773	1.1924	1024	71.95
mlp_1		vtab-diabetic_retinopathy(config="btgraham-300")	imagenet22k_sup_rnx_base	0.1	0.01	88623237	1056773	1.1924	1024	73.32
mlp_1		vtab-diabetic_retinopathy(config="btgraham-300")	imagenet22k_sup_rnx_base	0.1	0.01	88623237	1056773	1.1924	1024	71.55
mlp_1		vtab-diabetic_retinopathy(config="btgraham-300")	imagenet_sup_rn50	0.05	0	27718725	4210693	15.1908	2048	71.47
mlp_1		vtab-diabetic_retinopathy(config="btgraham-300")	imagenet_sup_rn50	0.05	0	27718725	4210693	15.1908	2048	65.98
mlp_1		vtab-diabetic_retinopathy(config="btgraham-300")	imagenet_sup_rn50	0.05	0	27718725	4210693	15.1908	2048	66.46
mlp_1		vtab-diabetic_retinopathy(config="btgraham-300")	sup_vitb16_imagenet21k	0.05	0.01	86394629	595973	0.6898	2048	72.68
mlp_1		vtab-diabetic_retinopathy(config="btgraham-300")	sup_vitb16_imagenet21k	0.05	0.01	86394629	595973	0.6898	2048	73.69
mlp_1		vtab-diabetic_retinopathy(config="btgraham-300")	sup_vitb16_imagenet21k	0.05	0.01	86394629	595973	0.6898	2048	73.29
mlp_1		vtab-diabetic_retinopathy(config="btgraham-300")	swinb_imagenet22k_224	0.1	0.01	87799997	1056773	1.2036	1024	73.33
mlp_1		vtab-diabetic_retinopathy(config="btgraham-300")	swinb_imagenet22k_224	0.1	0.01	87799997	1056773	1.2036	1024	73.38
mlp_1		vtab-diabetic_retinopathy(config="btgraham-300")	swinb_imagenet22k_224	0.1	0.01	87799997	1056773	1.2036	1024	73.6
mlp_1		vtab-dmlab	imagenet22k_sup_rnx_base	0.25	0	88624262	1057798	1.1936	1024	39.49
mlp_1		vtab-dmlab	imagenet22k_sup_rnx_base	0.25	0	88624262	1057798	1.1936	1024	38.47
mlp_1		vtab-dmlab	imagenet22k_sup_rnx_base	0.25	0	88624262	1057798	1.1936	1024	38.28
mlp_1		vtab-dmlab	imagenet_sup_rn50	0.05	0.001	27720774	4212742	15.1971	2048	35.05
mlp_1		vtab-dmlab	imagenet_sup_rn50	0.05	0.001	27720774	4212742	15.1971	2048	35.63
mlp_1		vtab-dmlab	imagenet_sup_rn50	0.05	0.001	27720774	4212742	15.1971	2048	34.19
mlp_1		vtab-dmlab	sup_vitb16_imagenet21k	0.05	0.001	86395398	596742	0.6907	2048	31.93
mlp_1		vtab-dmlab	sup_vitb16_imagenet21k	0.05	0.001	86395398	596742	0.6907	2048	31.65
mlp_1		vtab-dmlab	sup_vitb16_imagenet21k	0.05	0.001	86395398	596742	0.6907	2048	31.85
mlp_1		vtab-dmlab	swinb_imagenet22k_224	0.1	0.01	87801022	1057798	1.2048	1024	41.28
mlp_1		vtab-dmlab	swinb_imagenet22k_224	0.1	0.01	87801022	1057798	1.2048	1024	39.19
mlp_1		vtab-dmlab	swinb_imagenet22k_224	0.1	0.01	87801022	1057798	1.2048	1024	40.03
mlp_1		vtab-dsprites(predicted_attribute="label_orientation",num_classes=16)	imagenet22k_sup_rnx_base	0.05	0.01	88634512	1068048	1.205	1024	30.96
mlp_1		vtab-dsprites(predicted_attribute="label_orientation",num_classes=16)	imagenet22k_sup_rnx_base	0.05	0.01	88634512	1068048	1.205	1024	31.31
mlp_1		vtab-dsprites(predicted_attribute="label_orientation",num_classes=16)	imagenet22k_sup_rnx_base	0.05	0.01	88634512	1068048	1.205	1024	30.84
mlp_1		vtab-dsprites(predicted_attribute="label_orientation",num_classes=16)	imagenet_sup_rn50	0.05	0	27741264	4233232	15.2597	2048	23.1
mlp_1		vtab-dsprites(predicted_attribute="label_orientation",num_classes=16)	imagenet_sup_rn50	0.05	0	27741264	4233232	15.2597	2048	22.9
mlp_1		vtab-dsprites(predicted_attribute="label_orientation",num_classes=16)	imagenet_sup_rn50	0.05	0	27741264	4233232	15.2597	2048	22.99
mlp_1		vtab-dsprites(predicted_attribute="label_orientation",num_classes=16)	sup_vitb16_imagenet21k	0.05	0.01	86403088	604432	0.6995	2048	25.7
mlp_1		vtab-dsprites(predicted_attribute="label_orientation",num_classes=16)	sup_vitb16_imagenet21k	0.05	0.01	86403088	604432	0.6995	2048	25.7
mlp_1		vtab-dsprites(predicted_attribute="label_orientation",num_classes=16)	sup_vitb16_imagenet21k	0.05	0.01	86403088	604432	0.6995	2048	22.46
mlp_1		vtab-dsprites(predicted_attribute="label_orientation",num_classes=16)	swinb_imagenet22k_224	0.05	0	87811272	1068048	1.2163	1024	26.33
mlp_1		vtab-dsprites(predicted_attribute="label_orientation",num_classes=16)	swinb_imagenet22k_224	0.05	0	87811272	1068048	1.2163	1024	25.89
mlp_1		vtab-dsprites(predicted_attribute="label_orientation",num_classes=16)	swinb_imagenet22k_224	0.05	0	87811272	1068048	1.2163	1024	25.75
mlp_1		vtab-dsprites(predicted_attribute="label_orientation",num_classes=16)	swinb_imagenet22k_224	0.1	0.0001	87811272	1068048	1.2163	1024	25.54
mlp_1		vtab-dsprites(predicted_attribute="label_orientation",num_classes=16)	swinb_imagenet22k_224	0.1	0.0001	87811272	1068048	1.2163	1024	24.19
mlp_1		vtab-dsprites(predicted_attribute="label_orientation",num_classes=16)	swinb_imagenet22k_224	0.1	0.0001	87811272	1068048	1.2163	1024	23.76
mlp_1		vtab-dsprites(predicted_attribute="label_x_position",num_classes=16)	imagenet22k_sup_rnx_base	0.05	0	88634512	1068048	1.205	1024	12.41
mlp_1		vtab-dsprites(predicted_attribute="label_x_position",num_classes=16)	imagenet22k_sup_rnx_base	0.05	0	88634512	1068048	1.205	1024	11.24
mlp_1		vtab-dsprites(predicted_attribute="label_x_position",num_classes=16)	imagenet22k_sup_rnx_base	0.05	0	88634512	1068048	1.205	1024	13.05
mlp_1		vtab-dsprites(predicted_attribute="label_x_position",num_classes=16)	imagenet22k_sup_rnx_base	0.1	0	88634512	1068048	1.205	1024	9.98
mlp_1		vtab-dsprites(predicted_attribute="label_x_position",num_classes=16)	imagenet_sup_rn50	0.05	0.0001	27741264	4233232	15.2597	2048	36.04
mlp_1		vtab-dsprites(predicted_attribute="label_x_position",num_classes=16)	imagenet_sup_rn50	0.05	0.0001	27741264	4233232	15.2597	2048	36.98
mlp_1		vtab-dsprites(predicted_attribute="label_x_position",num_classes=16)	imagenet_sup_rn50	0.05	0.0001	27741264	4233232	15.2597	2048	38.02
mlp_1		vtab-dsprites(predicted_attribute="label_x_position",num_classes=16)	sup_vitb16_imagenet21k	0.05	0.01	86403088	604432	0.6995	2048	31.01
mlp_1		vtab-dsprites(predicted_attribute="label_x_position",num_classes=16)	sup_vitb16_imagenet21k	0.05	0.01	86403088	604432	0.6995	2048	31.61
mlp_1		vtab-dsprites(predicted_attribute="label_x_position",num_classes=16)	sup_vitb16_imagenet21k	0.05	0.01	86403088	604432	0.6995	2048	30.16
mlp_1		vtab-dsprites(predicted_attribute="label_x_position",num_classes=16)	swinb_imagenet22k_224	0.05	0.01	87811272	1068048	1.2163	1024	13.12
mlp_1		vtab-dsprites(predicted_attribute="label_x_position",num_classes=16)	swinb_imagenet22k_224	0.05	0.01	87811272	1068048	1.2163	1024	14.83
mlp_1		vtab-dsprites(predicted_attribute="label_x_position",num_classes=16)	swinb_imagenet22k_224	0.05	0.01	87811272	1068048	1.2163	1024	13.22
mlp_1		vtab-dtd	imagenet22k_sup_rnx_base	0.1	0.01	88666287	1099823	1.2404	1024	76.17
mlp_1		vtab-dtd	imagenet22k_sup_rnx_base	0.1	0.01	88666287	1099823	1.2404	1024	75.96
mlp_1		vtab-dtd	imagenet22k_sup_rnx_base	0.1	0.01	88666287	1099823	1.2404	1024	75.8
mlp_1		vtab-dtd	imagenet_sup_rn50	0.5	0.0001	27804783	4296751	15.4533	2048	59.26
mlp_1		vtab-dtd	imagenet_sup_rn50	0.5	0.0001	27804783	4296751	15.4533	2048	58.35
mlp_1		vtab-dtd	imagenet_sup_rn50	0.5	0.0001	27804783	4296751	15.4533	2048	57.77
mlp_1		vtab-dtd	sup_vitb16_imagenet21k	0.5	0.001	86426927	628271	0.7269	2048	59.52
mlp_1		vtab-dtd	sup_vitb16_imagenet21k	0.5	0.001	86426927	628271	0.7269	2048	61.06
mlp_1		vtab-dtd	sup_vitb16_imagenet21k	0.5	0.001	86426927	628271	0.7269	2048	60.8
mlp_1		vtab-dtd	swinb_imagenet22k_224	0.05	0.01	87843047	1099823	1.252	1024	74.52
mlp_1		vtab-dtd	swinb_imagenet22k_224	0.05	0.01	87843047	1099823	1.252	1024	74.84
mlp_1		vtab-dtd	swinb_imagenet22k_224	0.05	0.01	87843047	1099823	1.252	1024	74.79
mlp_1		vtab-dtd	swinb_imagenet22k_224	0.1	0	87843047	1099823	1.252	1024	72.93
mlp_1		vtab-dtd	swinb_imagenet22k_224	0.1	0	87843047	1099823	1.252	1024	73.14
mlp_1		vtab-dtd	swinb_imagenet22k_224	0.1	0	87843047	1099823	1.252	1024	74.41
mlp_1		vtab-eurosat	imagenet22k_sup_rnx_base	0.5	0.01	88628362	1061898	1.1981	1024	92
mlp_1		vtab-eurosat	imagenet22k_sup_rnx_base	0.5	0.01	88628362	1061898	1.1981	1024	91.37
mlp_1		vtab-eurosat	imagenet22k_sup_rnx_base	0.5	0.01	88628362	1061898	1.1981	1024	90.89
mlp_1		vtab-eurosat	imagenet_sup_rn50	0.25	0.001	27728970	4220938	15.2221	2048	91.09
mlp_1		vtab-eurosat	imagenet_sup_rn50	0.25	0.001	27728970	4220938	15.2221	2048	90.5
mlp_1		vtab-eurosat	imagenet_sup_rn50	0.25	0.001	27728970	4220938	15.2221	2048	91.46
mlp_1		vtab-eurosat	sup_vitb16_imagenet21k	0.25	0.01	86398474	599818	0.6942	2048	89.28
mlp_1		vtab-eurosat	sup_vitb16_imagenet21k	0.25	0.01	86398474	599818	0.6942	2048	87.76
mlp_1		vtab-eurosat	sup_vitb16_imagenet21k	0.25	0.01	86398474	599818	0.6942	2048	89.28
mlp_1		vtab-eurosat	swinb_imagenet22k_224	0.25	0.01	87805122	1061898	1.2094	1024	92.94
mlp_1		vtab-eurosat	swinb_imagenet22k_224	0.25	0.01	87805122	1061898	1.2094	1024	93.07
mlp_1		vtab-eurosat	swinb_imagenet22k_224	0.25	0.01	87805122	1061898	1.2094	1024	92.7
mlp_1		vtab-kitti(task="closest_vehicle_distance")	imagenet22k_sup_rnx_base	0.25	0.001	88622212	1055748	1.1913	1024	64.56
mlp_1		vtab-kitti(task="closest_vehicle_distance")	imagenet22k_sup_rnx_base	0.25	0.001	88622212	1055748	1.1913	1024	61.74
mlp_1		vtab-kitti(task="closest_vehicle_distance")	imagenet22k_sup_rnx_base	0.25	0.001	88622212	1055748	1.1913	1024	63.01
mlp_1		vtab-kitti(task="closest_vehicle_distance")	imagenet_sup_rn50	0.05	0.01	27716676	4208644	15.1845	2048	63.57
mlp_1		vtab-kitti(task="closest_vehicle_distance")	imagenet_sup_rn50	0.05	0.01	27716676	4208644	15.1845	2048	59.07
mlp_1		vtab-kitti(task="closest_vehicle_distance")	imagenet_sup_rn50	0.05	0.01	27716676	4208644	15.1845	2048	64.42
mlp_1		vtab-kitti(task="closest_vehicle_distance")	sup_vitb16_imagenet21k	0.25	0.001	86393860	595204	0.6889	2048	55.13
mlp_1		vtab-kitti(task="closest_vehicle_distance")	sup_vitb16_imagenet21k	0.25	0.001	86393860	595204	0.6889	2048	56.82
mlp_1		vtab-kitti(task="closest_vehicle_distance")	sup_vitb16_imagenet21k	0.25	0.001	86393860	595204	0.6889	2048	55.27
mlp_1		vtab-kitti(task="closest_vehicle_distance")	swinb_imagenet22k_224	1	0.001	87798972	1055748	1.2025	1024	63.57
mlp_1		vtab-kitti(task="closest_vehicle_distance")	swinb_imagenet22k_224	1	0.001	87798972	1055748	1.2025	1024	60.06
mlp_1		vtab-kitti(task="closest_vehicle_distance")	swinb_imagenet22k_224	1	0.001	87798972	1055748	1.2025	1024	67.23
mlp_1		vtab-oxford_flowers102	imagenet22k_sup_rnx_base	0.05	0.01	88722662	1156198	1.3032	1024	99.45
mlp_1		vtab-oxford_flowers102	imagenet22k_sup_rnx_base	0.05	0.01	88722662	1156198	1.3032	1024	99.4
mlp_1		vtab-oxford_flowers102	imagenet22k_sup_rnx_base	0.05	0.01	88722662	1156198	1.3032	1024	99.5
mlp_1		vtab-oxford_flowers102	imagenet_sup_rn50	0.1	0.01	27917478	4409446	15.7946	2048	81.48
mlp_1		vtab-oxford_flowers102	imagenet_sup_rn50	0.1	0.01	27917478	4409446	15.7946	2048	80.18
mlp_1		vtab-oxford_flowers102	imagenet_sup_rn50	0.1	0.01	27917478	4409446	15.7946	2048	80.97
mlp_1		vtab-oxford_flowers102	sup_vitb16_imagenet21k	0.1	0.01	86469222	670566	0.7755	2048	97.71
mlp_1		vtab-oxford_flowers102	sup_vitb16_imagenet21k	0.1	0.01	86469222	670566	0.7755	2048	97.53
mlp_1		vtab-oxford_flowers102	sup_vitb16_imagenet21k	0.1	0.01	86469222	670566	0.7755	2048	97.54
mlp_1		vtab-oxford_flowers102	sup_vitb16_imagenet21k	0.25	0.01	86469222	670566	0.7755	2048	97.54
mlp_1		vtab-oxford_flowers102	sup_vitb16_imagenet21k	0.25	0.01	86469222	670566	0.7755	2048	97.64
mlp_1		vtab-oxford_flowers102	sup_vitb16_imagenet21k	0.25	0.01	86469222	670566	0.7755	2048	97.61
mlp_1		vtab-oxford_flowers102	swinb_imagenet22k_224	0.1	0.01	87899422	1156198	1.3154	1024	99.53
mlp_1		vtab-oxford_flowers102	swinb_imagenet22k_224	0.1	0.01	87899422	1156198	1.3154	1024	99.5
mlp_1		vtab-oxford_flowers102	swinb_imagenet22k_224	0.1	0.01	87899422	1156198	1.3154	1024	99.51
mlp_1		vtab-oxford_flowers102	swinb_imagenet22k_224	1	0.0001	87899422	1156198	1.3154	1024	98.57
mlp_1		vtab-oxford_flowers102	swinb_imagenet22k_224	1	0.0001	87899422	1156198	1.3154	1024	98.62
mlp_1		vtab-oxford_flowers102	swinb_imagenet22k_224	1	0.0001	87899422	1156198	1.3154	1024	98.41
mlp_1		vtab-oxford_iiit_pet	imagenet22k_sup_rnx_base	0.25	0.0001	88656037	1089573	1.229	1024	90.11
mlp_1		vtab-oxford_iiit_pet	imagenet22k_sup_rnx_base	0.25	0.0001	88656037	1089573	1.229	1024	91.14
mlp_1		vtab-oxford_iiit_pet	imagenet22k_sup_rnx_base	0.25	0.0001	88656037	1089573	1.229	1024	91.17
mlp_1		vtab-oxford_iiit_pet	imagenet_sup_rn50	0.05	0.01	27784293	4276261	15.3909	2048	87.74
mlp_1		vtab-oxford_iiit_pet	imagenet_sup_rn50	0.05	0.01	27784293	4276261	15.3909	2048	87.16
mlp_1		vtab-oxford_iiit_pet	imagenet_sup_rn50	0.05	0.01	27784293	4276261	15.3909	2048	87.6
mlp_1		vtab-oxford_iiit_pet	sup_vitb16_imagenet21k	0.05	0.01	86419237	620581	0.7181	2048	86.13
mlp_1		vtab-oxford_iiit_pet	sup_vitb16_imagenet21k	0.05	0.01	86419237	620581	0.7181	2048	85.69
mlp_1		vtab-oxford_iiit_pet	sup_vitb16_imagenet21k	0.05	0.01	86419237	620581	0.7181	2048	85.99
mlp_1		vtab-oxford_iiit_pet	swinb_imagenet22k_224	0.05	0.01	87832797	1089573	1.2405	1024	89.18
mlp_1		vtab-oxford_iiit_pet	swinb_imagenet22k_224	0.05	0.01	87832797	1089573	1.2405	1024	89.53
mlp_1		vtab-oxford_iiit_pet	swinb_imagenet22k_224	0.05	0.01	87832797	1089573	1.2405	1024	90.54
mlp_1		vtab-patch_camelyon	imagenet22k_sup_rnx_base	0.1	0.0001	88620162	1053698	1.189	1024	83.29
mlp_1		vtab-patch_camelyon	imagenet22k_sup_rnx_base	0.1	0.0001	88620162	1053698	1.189	1024	83.11
mlp_1		vtab-patch_camelyon	imagenet22k_sup_rnx_base	0.1	0.0001	88620162	1053698	1.189	1024	82.1
mlp_1		vtab-patch_camelyon	imagenet_sup_rn50	0.05	0.01	27712578	4204546	15.172	2048	79.38
mlp_1		vtab-patch_camelyon	imagenet_sup_rn50	0.05	0.01	27712578	4204546	15.172	2048	78.71
mlp_1		vtab-patch_camelyon	imagenet_sup_rn50	0.05	0.01	27712578	4204546	15.172	2048	79.49
mlp_1		vtab-patch_camelyon	sup_vitb16_imagenet21k	0.5	0.01	86392322	593666	0.6872	2048	71.75
mlp_1		vtab-patch_camelyon	sup_vitb16_imagenet21k	0.5	0.01	86392322	593666	0.6872	2048	75.99
mlp_1		vtab-patch_camelyon	sup_vitb16_imagenet21k	0.5	0.01	86392322	593666	0.6872	2048	75.26
mlp_1		vtab-patch_camelyon	swinb_imagenet22k_224	0.1	0.001	87796922	1053698	1.2002	1024	82.09
mlp_1		vtab-patch_camelyon	swinb_imagenet22k_224	0.1	0.001	87796922	1053698	1.2002	1024	82.43
mlp_1		vtab-patch_camelyon	swinb_imagenet22k_224	0.1	0.001	87796922	1053698	1.2002	1024	82.14
mlp_1		vtab-resisc45	imagenet22k_sup_rnx_base	0.1	0.01	88664237	1097773	1.2381	1024	82.02
mlp_1		vtab-resisc45	imagenet22k_sup_rnx_base	0.1	0.01	88664237	1097773	1.2381	1024	82.17
mlp_1		vtab-resisc45	imagenet22k_sup_rnx_base	0.1	0.01	88664237	1097773	1.2381	1024	82.24
mlp_1		vtab-resisc45	imagenet_sup_rn50	0.1	0.01	27800685	4292653	15.4408	2048	72.48
mlp_1		vtab-resisc45	imagenet_sup_rn50	0.1	0.01	27800685	4292653	15.4408	2048	73.24
mlp_1		vtab-resisc45	imagenet_sup_rn50	0.1	0.01	27800685	4292653	15.4408	2048	72.54
mlp_1		vtab-resisc45	sup_vitb16_imagenet21k	0.25	0.01	86425389	626733	0.7252	2048	69.62
mlp_1		vtab-resisc45	sup_vitb16_imagenet21k	0.25	0.01	86425389	626733	0.7252	2048	70.06
mlp_1		vtab-resisc45	sup_vitb16_imagenet21k	0.25	0.01	86425389	626733	0.7252	2048	61.71
mlp_1		vtab-resisc45	swinb_imagenet22k_224	0.1	0.01	87840997	1097773	1.2497	1024	81.71
mlp_1		vtab-resisc45	swinb_imagenet22k_224	0.1	0.01	87840997	1097773	1.2497	1024	81.4
mlp_1		vtab-resisc45	swinb_imagenet22k_224	0.1	0.01	87840997	1097773	1.2497	1024	81.24
mlp_1		vtab-smallnorb(predicted_attribute="label_azimuth")	imagenet22k_sup_rnx_base	0.1	0.01	88636562	1070098	1.2073	1024	20.12
mlp_1		vtab-smallnorb(predicted_attribute="label_azimuth")	imagenet22k_sup_rnx_base	0.1	0.01	88636562	1070098	1.2073	1024	19.14
mlp_1		vtab-smallnorb(predicted_attribute="label_azimuth")	imagenet22k_sup_rnx_base	0.1	0.01	88636562	1070098	1.2073	1024	19.31
mlp_1		vtab-smallnorb(predicted_attribute="label_azimuth")	imagenet_sup_rn50	0.1	0.001	27745362	4237330	15.2722	2048	14.12
mlp_1		vtab-smallnorb(predicted_attribute="label_azimuth")	imagenet_sup_rn50	0.1	0.001	27745362	4237330	15.2722	2048	13.88
mlp_1		vtab-smallnorb(predicted_attribute="label_azimuth")	imagenet_sup_rn50	0.1	0.001	27745362	4237330	15.2722	2048	12.42
mlp_1		vtab-smallnorb(predicted_attribute="label_azimuth")	sup_vitb16_imagenet21k	0.05	0.01	86404626	605970	0.7013	2048	16.75
mlp_1		vtab-smallnorb(predicted_attribute="label_azimuth")	sup_vitb16_imagenet21k	0.05	0.01	86404626	605970	0.7013	2048	16.42
mlp_1		vtab-smallnorb(predicted_attribute="label_azimuth")	sup_vitb16_imagenet21k	0.05	0.01	86404626	605970	0.7013	2048	16.53
mlp_1		vtab-smallnorb(predicted_attribute="label_azimuth")	swinb_imagenet22k_224	0.25	0.01	87813322	1070098	1.2186	1024	15.51
mlp_1		vtab-smallnorb(predicted_attribute="label_azimuth")	swinb_imagenet22k_224	0.25	0.01	87813322	1070098	1.2186	1024	19.27
mlp_1		vtab-smallnorb(predicted_attribute="label_azimuth")	swinb_imagenet22k_224	0.25	0.01	87813322	1070098	1.2186	1024	15.31
mlp_1		vtab-smallnorb(predicted_attribute="label_elevation")	imagenet22k_sup_rnx_base	0.5	0.01	88627337	1060873	1.197	1024	26.12
mlp_1		vtab-smallnorb(predicted_attribute="label_elevation")	imagenet22k_sup_rnx_base	0.5	0.01	88627337	1060873	1.197	1024	26.94
mlp_1		vtab-smallnorb(predicted_attribute="label_elevation")	imagenet22k_sup_rnx_base	0.5	0.01	88627337	1060873	1.197	1024	26.7
mlp_1		vtab-smallnorb(predicted_attribute="label_elevation")	imagenet_sup_rn50	0.1	0	27726921	4218889	15.2159	2048	25.57
mlp_1		vtab-smallnorb(predicted_attribute="label_elevation")	imagenet_sup_rn50	0.1	0	27726921	4218889	15.2159	2048	25.54
mlp_1		vtab-smallnorb(predicted_attribute="label_elevation")	imagenet_sup_rn50	0.1	0	27726921	4218889	15.2159	2048	25.73
mlp_1		vtab-smallnorb(predicted_attribute="label_elevation")	sup_vitb16_imagenet21k	0.25	0.0001	86397705	599049	0.6934	2048	23.17
mlp_1		vtab-smallnorb(predicted_attribute="label_elevation")	sup_vitb16_imagenet21k	0.25	0.0001	86397705	599049	0.6934	2048	23.19
mlp_1		vtab-smallnorb(predicted_attribute="label_elevation")	sup_vitb16_imagenet21k	0.25	0.0001	86397705	599049	0.6934	2048	23.48
mlp_1		vtab-smallnorb(predicted_attribute="label_elevation")	swinb_imagenet22k_224	0.05	0.01	87804097	1060873	1.2082	1024	27.98
mlp_1		vtab-smallnorb(predicted_attribute="label_elevation")	swinb_imagenet22k_224	0.05	0.01	87804097	1060873	1.2082	1024	27.78
mlp_1		vtab-smallnorb(predicted_attribute="label_elevation")	swinb_imagenet22k_224	0.05	0.01	87804097	1060873	1.2082	1024	27.91
mlp_1		vtab-sun397	imagenet22k_sup_rnx_base	1	0.001	89025037	1458573	1.6384	1024	56.38
mlp_1		vtab-sun397	imagenet22k_sup_rnx_base	1	0.001	89025037	1458573	1.6384	1024	56.41
mlp_1		vtab-sun397	imagenet22k_sup_rnx_base	1	0.001	89025037	1458573	1.6384	1024	56.57
mlp_1		vtab-sun397	imagenet_sup_rn50	0.1	0.001	28521933	5013901	17.5791	2048	32.73
mlp_1		vtab-sun397	imagenet_sup_rn50	0.1	0.001	28521933	5013901	17.5791	2048	32.05
mlp_1		vtab-sun397	imagenet_sup_rn50	0.1	0.001	28521933	5013901	17.5791	2048	31.71
mlp_1		vtab-sun397	sup_vitb16_imagenet21k	0.05	0	86696077	897421	1.0351	2048	48.11
mlp_1		vtab-sun397	sup_vitb16_imagenet21k	0.05	0	86696077	897421	1.0351	2048	47.5
mlp_1		vtab-sun397	sup_vitb16_imagenet21k	0.05	0	86696077	897421	1.0351	2048	47.71
mlp_1		vtab-sun397	swinb_imagenet22k_224	0.1	0.01	88201797	1458573	1.6537	1024	55.38
mlp_1		vtab-sun397	swinb_imagenet22k_224	0.1	0.01	88201797	1458573	1.6537	1024	55.04
mlp_1		vtab-sun397	swinb_imagenet22k_224	0.1	0.01	88201797	1458573	1.6537	1024	55.66
mlp_1		vtab-svhn	imagenet22k_sup_rnx_base	0.1	0.01	88628362	1061898	1.1981	1024	49.6
mlp_1		vtab-svhn	imagenet22k_sup_rnx_base	0.1	0.01	88628362	1061898	1.1981	1024	48.63
mlp_1		vtab-svhn	imagenet22k_sup_rnx_base	0.1	0.01	88628362	1061898	1.1981	1024	49.19
mlp_1		vtab-svhn	imagenet_sup_rn50	0.05	0.01	27728970	4220938	15.2221	2048	45.57
mlp_1		vtab-svhn	imagenet_sup_rn50	0.05	0.01	27728970	4220938	15.2221	2048	45.14
mlp_1		vtab-svhn	imagenet_sup_rn50	0.05	0.01	27728970	4220938	15.2221	2048	45.18
mlp_1		vtab-svhn	sup_vitb16_imagenet21k	0.05	0.0001	86398474	599818	0.6942	2048	33.5
mlp_1		vtab-svhn	sup_vitb16_imagenet21k	0.05	0.0001	86398474	599818	0.6942	2048	34.57
mlp_1		vtab-svhn	sup_vitb16_imagenet21k	0.05	0.0001	86398474	599818	0.6942	2048	34.27
mlp_1		vtab-svhn	swinb_imagenet22k_224	0.1	0.01	87805122	1061898	1.2094	1024	44.41
mlp_1		vtab-svhn	swinb_imagenet22k_224	0.1	0.01	87805122	1061898	1.2094	1024	43.52
mlp_1		vtab-svhn	swinb_imagenet22k_224	0.1	0.01	87805122	1061898	1.2094	1024	44.53
mlp_2		vtab-caltech101	imagenet22k_sup_rnx_base	0.25	0.01	89774310	2207846	2.4593	1024	90.96
mlp_2		vtab-caltech101	imagenet22k_sup_rnx_base	0.25	0.01	89774310	2207846	2.4593	1024	89.96
mlp_2		vtab-caltech101	imagenet22k_sup_rnx_base	0.25	0.01	89774310	2207846	2.4593	1024	90.11
mlp_2		vtab-caltech101	imagenet_sup_rn50	0.1	0.01	32117926	8609894	26.8071	2048	85.82
mlp_2		vtab-caltech101	imagenet_sup_rn50	0.1	0.01	32117926	8609894	26.8071	2048	86.87
mlp_2		vtab-caltech101	imagenet_sup_rn50	0.1	0.01	32117926	8609894	26.8071	2048	85.6
mlp_2		vtab-caltech101	sup_vitb16_imagenet21k	0.1	0.01	87061350	1262694	1.4503	2048	84.85
mlp_2		vtab-caltech101	sup_vitb16_imagenet21k	0.1	0.01	87061350	1262694	1.4503	2048	84.43
mlp_2		vtab-caltech101	sup_vitb16_imagenet21k	0.1	0.01	87061350	1262694	1.4503	2048	84.68
mlp_2		vtab-caltech101	swinb_imagenet22k_224	0.25	0.01	88951070	2207846	2.4821	1024	91.32
mlp_2		vtab-caltech101	swinb_imagenet22k_224	0.25	0.01	88951070	2207846	2.4821	1024	90.8
mlp_2		vtab-caltech101	swinb_imagenet22k_224	0.25	0.01	88951070	2207846	2.4821	1024	90.65
mlp_2		vtab-caltech101	swinb_imagenet22k_224	1	0.01	88951070	2207846	2.4821	1024	91.9
mlp_2		vtab-caltech101	swinb_imagenet22k_224	1	0.01	88951070	2207846	2.4821	1024	91.31
mlp_2		vtab-caltech101	swinb_imagenet22k_224	1	0.01	88951070	2207846	2.4821	1024	92.62
mlp_2		vtab-cifar(num_classes=100)	imagenet22k_sup_rnx_base	0.25	0.01	89772260	2205796	2.4571	1024	64.55
mlp_2		vtab-cifar(num_classes=100)	imagenet22k_sup_rnx_base	0.25	0.01	89772260	2205796	2.4571	1024	65.06
mlp_2		vtab-cifar(num_classes=100)	imagenet22k_sup_rnx_base	0.25	0.01	89772260	2205796	2.4571	1024	64.44
mlp_2		vtab-cifar(num_classes=100)	imagenet_sup_rn50	0.05	0.01	32113828	8605796	26.7978	2048	47.5
mlp_2		vtab-cifar(num_classes=100)	imagenet_sup_rn50	0.05	0.01	32113828	8605796	26.7978	2048	47.09
mlp_2		vtab-cifar(num_classes=100)	imagenet_sup_rn50	0.05	0.01	32113828	8605796	26.7978	2048	47.66
mlp_2		vtab-cifar(num_classes=100)	sup_vitb16_imagenet21k	0.05	0.01	87059812	1261156	1.4486	2048	63.82
mlp_2		vtab-cifar(num_classes=100)	sup_vitb16_imagenet21k	0.05	0.01	87059812	1261156	1.4486	2048	63.88
mlp_2		vtab-cifar(num_classes=100)	sup_vitb16_imagenet21k	0.05	0.01	87059812	1261156	1.4486	2048	63.66
mlp_2		vtab-cifar(num_classes=100)	swinb_imagenet22k_224	0.25	0.01	88949020	2205796	2.4798	1024	61.95
mlp_2		vtab-cifar(num_classes=100)	swinb_imagenet22k_224	0.25	0.01	88949020	2205796	2.4798	1024	61.66
mlp_2		vtab-cifar(num_classes=100)	swinb_imagenet22k_224	0.25	0.01	88949020	2205796	2.4798	1024	61.75
mlp_2		vtab-clevr(task="closest_object_distance")	imagenet22k_sup_rnx_base	0.25	0.01	89675910	2109446	2.3523	1024	41.71
mlp_2		vtab-clevr(task="closest_object_distance")	imagenet22k_sup_rnx_base	0.25	0.01	89675910	2109446	2.3523	1024	40.84
mlp_2		vtab-clevr(task="closest_object_distance")	imagenet22k_sup_rnx_base	0.25	0.01	89675910	2109446	2.3523	1024	42.01
mlp_2		vtab-clevr(task="closest_object_distance")	imagenet_sup_rn50	0.1	0.0001	31921222	8413190	26.3561	2048	36.25
mlp_2		vtab-clevr(task="closest_object_distance")	imagenet_sup_rn50	0.1	0.0001	31921222	8413190	26.3561	2048	37.25
mlp_2		vtab-clevr(task="closest_object_distance")	imagenet_sup_rn50	0.1	0.0001	31921222	8413190	26.3561	2048	37.33
mlp_2		vtab-clevr(task="closest_object_distance")	sup_vitb16_imagenet21k	0.1	0	86987526	1188870	1.3667	2048	31.37
mlp_2		vtab-clevr(task="closest_object_distance")	sup_vitb16_imagenet21k	0.1	0	86987526	1188870	1.3667	2048	32.15
mlp_2		vtab-clevr(task="closest_object_distance")	sup_vitb16_imagenet21k	0.1	0	86987526	1188870	1.3667	2048	34.81
mlp_2		vtab-clevr(task="closest_object_distance")	swinb_imagenet22k_224	0.1	0.01	88852670	2109446	2.3741	1024	39.81
mlp_2		vtab-clevr(task="closest_object_distance")	swinb_imagenet22k_224	0.1	0.01	88852670	2109446	2.3741	1024	38.53
mlp_2		vtab-clevr(task="closest_object_distance")	swinb_imagenet22k_224	0.1	0.01	88852670	2109446	2.3741	1024	39.31
mlp_2		vtab-clevr(task="count_all")	imagenet22k_sup_rnx_base	0.5	0.001	89677960	2111496	2.3545	1024	55.51
mlp_2		vtab-clevr(task="count_all")	imagenet22k_sup_rnx_base	0.5	0.001	89677960	2111496	2.3545	1024	54.88
mlp_2		vtab-clevr(task="count_all")	imagenet22k_sup_rnx_base	0.5	0.001	89677960	2111496	2.3545	1024	47.95
mlp_2		vtab-clevr(task="count_all")	imagenet_sup_rn50	0.25	0.0001	31925320	8417288	26.3656	2048	44.87
mlp_2		vtab-clevr(task="count_all")	imagenet_sup_rn50	0.25	0.0001	31925320	8417288	26.3656	2048	49.07
mlp_2		vtab-clevr(task="count_all")	imagenet_sup_rn50	0.25	0.0001	31925320	8417288	26.3656	2048	46.3
mlp_2		vtab-clevr(task="count_all")	sup_vitb16_imagenet21k	0.1	0	86989064	1190408	1.3685	2048	48.93
mlp_2		vtab-clevr(task="count_all")	sup_vitb16_imagenet21k	0.1	0	86989064	1190408	1.3685	2048	45.75
mlp_2		vtab-clevr(task="count_all")	sup_vitb16_imagenet21k	0.1	0	86989064	1190408	1.3685	2048	48.6
mlp_2		vtab-clevr(task="count_all")	swinb_imagenet22k_224	0.25	0.0001	88854720	2111496	2.3763	1024	59.25
mlp_2		vtab-clevr(task="count_all")	swinb_imagenet22k_224	0.25	0.0001	88854720	2111496	2.3763	1024	57.37
mlp_2		vtab-clevr(task="count_all")	swinb_imagenet22k_224	0.25	0.0001	88854720	2111496	2.3763	1024	56.31
mlp_2		vtab-diabetic_retinopathy(config="btgraham-300")	imagenet22k_sup_rnx_base	0.1	0.01	89674885	2108421	2.3512	1024	74.31
mlp_2		vtab-diabetic_retinopathy(config="btgraham-300")	imagenet22k_sup_rnx_base	0.1	0.01	89674885	2108421	2.3512	1024	74.39
mlp_2		vtab-diabetic_retinopathy(config="btgraham-300")	imagenet22k_sup_rnx_base	0.1	0.01	89674885	2108421	2.3512	1024	74.87
mlp_2		vtab-diabetic_retinopathy(config="btgraham-300")	imagenet_sup_rn50	0.25	0.0001	31919173	8411141	26.3514	2048	72.55
mlp_2		vtab-diabetic_retinopathy(config="btgraham-300")	imagenet_sup_rn50	0.25	0.0001	31919173	8411141	26.3514	2048	35.24
mlp_2		vtab-diabetic_retinopathy(config="btgraham-300")	imagenet_sup_rn50	0.25	0.0001	31919173	8411141	26.3514	2048	20.1
mlp_2		vtab-diabetic_retinopathy(config="btgraham-300")	sup_vitb16_imagenet21k	0.1	0.001	86986757	1188101	1.3658	2048	55.7
mlp_2		vtab-diabetic_retinopathy(config="btgraham-300")	sup_vitb16_imagenet21k	0.1	0.001	86986757	1188101	1.3658	2048	50.2
mlp_2		vtab-diabetic_retinopathy(config="btgraham-300")	sup_vitb16_imagenet21k	0.1	0.001	86986757	1188101	1.3658	2048	62.33
mlp_2		vtab-diabetic_retinopathy(config="btgraham-300")	swinb_imagenet22k_224	0.5	0.001	88851645	2108421	2.373	1024	43.11
mlp_2		vtab-diabetic_retinopathy(config="btgraham-300")	swinb_imagenet22k_224	0.5	0.001	88851645	2108421	2.373	1024	48.71
mlp_2		vtab-diabetic_retinopathy(config="btgraham-300")	swinb_imagenet22k_224	0.5	0.001	88851645	2108421	2.373	1024	45.21
mlp_2		vtab-dmlab	imagenet22k_sup_rnx_base	0.05	0.0001	89675910	2109446	2.3523	1024	39.48
mlp_2		vtab-dmlab	imagenet22k_sup_rnx_base	0.05	0.0001	89675910	2109446	2.3523	1024	39.19
mlp_2		vtab-dmlab	imagenet22k_sup_rnx_base	0.05	0.0001	89675910	2109446	2.3523	1024	38.72
mlp_2		vtab-dmlab	imagenet_sup_rn50	0.05	0	31921222	8413190	26.3561	2048	36.09
mlp_2		vtab-dmlab	imagenet_sup_rn50	0.05	0	31921222	8413190	26.3561	2048	35.61
mlp_2		vtab-dmlab	imagenet_sup_rn50	0.05	0	31921222	8413190	26.3561	2048	35.66
mlp_2		vtab-dmlab	sup_vitb16_imagenet21k	0.1	0	86987526	1188870	1.3667	2048	32.48
mlp_2		vtab-dmlab	sup_vitb16_imagenet21k	0.1	0	86987526	1188870	1.3667	2048	32.29
mlp_2		vtab-dmlab	sup_vitb16_imagenet21k	0.1	0	86987526	1188870	1.3667	2048	32.03
mlp_2		vtab-dmlab	swinb_imagenet22k_224	0.1	0.01	88852670	2109446	2.3741	1024	41.14
mlp_2		vtab-dmlab	swinb_imagenet22k_224	0.1	0.01	88852670	2109446	2.3741	1024	39.45
mlp_2		vtab-dmlab	swinb_imagenet22k_224	0.1	0.01	88852670	2109446	2.3741	1024	40.04
mlp_2		vtab-dsprites(predicted_attribute="label_orientation",num_classes=16)	imagenet22k_sup_rnx_base	0.05	0	89686160	2119696	2.3635	1024	32.61
mlp_2		vtab-dsprites(predicted_attribute="label_orientation",num_classes=16)	imagenet22k_sup_rnx_base	0.05	0	89686160	2119696	2.3635	1024	31.29
mlp_2		vtab-dsprites(predicted_attribute="label_orientation",num_classes=16)	imagenet22k_sup_rnx_base	0.05	0	89686160	2119696	2.3635	1024	31.1
mlp_2		vtab-dsprites(predicted_attribute="label_orientation",num_classes=16)	imagenet22k_sup_rnx_base	0.1	0.01	89686160	2119696	2.3635	1024	29.4
mlp_2		vtab-dsprites(predicted_attribute="label_orientation",num_classes=16)	imagenet_sup_rn50	0.05	0.01	31941712	8433680	26.4033	2048	22.18
mlp_2		vtab-dsprites(predicted_attribute="label_orientation",num_classes=16)	imagenet_sup_rn50	0.05	0.01	31941712	8433680	26.4033	2048	20.35
mlp_2		vtab-dsprites(predicted_attribute="label_orientation",num_classes=16)	imagenet_sup_rn50	0.05	0.01	31941712	8433680	26.4033	2048	20.43
mlp_2		vtab-dsprites(predicted_attribute="label_orientation",num_classes=16)	sup_vitb16_imagenet21k	0.05	0.0001	86995216	1196560	1.3754	2048	19.53
mlp_2		vtab-dsprites(predicted_attribute="label_orientation",num_classes=16)	sup_vitb16_imagenet21k	0.05	0.0001	86995216	1196560	1.3754	2048	20.78
mlp_2		vtab-dsprites(predicted_attribute="label_orientation",num_classes=16)	sup_vitb16_imagenet21k	0.05	0.0001	86995216	1196560	1.3754	2048	23.23
mlp_2		vtab-dsprites(predicted_attribute="label_orientation",num_classes=16)	swinb_imagenet22k_224	0.05	0.001	88862920	2119696	2.3854	1024	25.61
mlp_2		vtab-dsprites(predicted_attribute="label_orientation",num_classes=16)	swinb_imagenet22k_224	0.05	0.001	88862920	2119696	2.3854	1024	24.84
mlp_2		vtab-dsprites(predicted_attribute="label_orientation",num_classes=16)	swinb_imagenet22k_224	0.05	0.001	88862920	2119696	2.3854	1024	24.13
mlp_2		vtab-dsprites(predicted_attribute="label_x_position",num_classes=16)	imagenet22k_sup_rnx_base	0.05	0.0001	89686160	2119696	2.3635	1024	9.54
mlp_2		vtab-dsprites(predicted_attribute="label_x_position",num_classes=16)	imagenet22k_sup_rnx_base	0.05	0.0001	89686160	2119696	2.3635	1024	8.96
mlp_2		vtab-dsprites(predicted_attribute="label_x_position",num_classes=16)	imagenet22k_sup_rnx_base	0.05	0.0001	89686160	2119696	2.3635	1024	7.82
mlp_2		vtab-dsprites(predicted_attribute="label_x_position",num_classes=16)	imagenet_sup_rn50	0.1	0	31941712	8433680	26.4033	2048	37.57
mlp_2		vtab-dsprites(predicted_attribute="label_x_position",num_classes=16)	imagenet_sup_rn50	0.1	0	31941712	8433680	26.4033	2048	37.57
mlp_2		vtab-dsprites(predicted_attribute="label_x_position",num_classes=16)	imagenet_sup_rn50	0.1	0	31941712	8433680	26.4033	2048	30.42
mlp_2		vtab-dsprites(predicted_attribute="label_x_position",num_classes=16)	sup_vitb16_imagenet21k	0.05	0.0001	86995216	1196560	1.3754	2048	12.71
mlp_2		vtab-dsprites(predicted_attribute="label_x_position",num_classes=16)	sup_vitb16_imagenet21k	0.05	0.0001	86995216	1196560	1.3754	2048	9.46
mlp_2		vtab-dsprites(predicted_attribute="label_x_position",num_classes=16)	sup_vitb16_imagenet21k	0.05	0.0001	86995216	1196560	1.3754	2048	16.53
mlp_2		vtab-dsprites(predicted_attribute="label_x_position",num_classes=16)	swinb_imagenet22k_224	0.1	0.01	88862920	2119696	2.3854	1024	10.62
mlp_2		vtab-dsprites(predicted_attribute="label_x_position",num_classes=16)	swinb_imagenet22k_224	0.1	0.01	88862920	2119696	2.3854	1024	9.55
mlp_2		vtab-dsprites(predicted_attribute="label_x_position",num_classes=16)	swinb_imagenet22k_224	0.1	0.01	88862920	2119696	2.3854	1024	13.7
mlp_2		vtab-dsprites(predicted_attribute="label_x_position",num_classes=16)	swinb_imagenet22k_224	0.25	0	88862920	2119696	2.3854	1024	10.27
mlp_2		vtab-dsprites(predicted_attribute="label_x_position",num_classes=16)	swinb_imagenet22k_224	0.25	0	88862920	2119696	2.3854	1024	9.22
mlp_2		vtab-dsprites(predicted_attribute="label_x_position",num_classes=16)	swinb_imagenet22k_224	0.25	0	88862920	2119696	2.3854	1024	9.39
mlp_2		vtab-dtd	imagenet22k_sup_rnx_base	0.25	0.01	89717935	2151471	2.398	1024	76.91
mlp_2		vtab-dtd	imagenet22k_sup_rnx_base	0.25	0.01	89717935	2151471	2.398	1024	75.96
mlp_2		vtab-dtd	imagenet22k_sup_rnx_base	0.25	0.01	89717935	2151471	2.398	1024	75.21
mlp_2		vtab-dtd	imagenet_sup_rn50	0.25	0.001	32005231	8497199	26.5494	2048	59.41
mlp_2		vtab-dtd	imagenet_sup_rn50	0.25	0.001	32005231	8497199	26.5494	2048	58.94
mlp_2		vtab-dtd	imagenet_sup_rn50	0.25	0.001	32005231	8497199	26.5494	2048	59.15
mlp_2		vtab-dtd	sup_vitb16_imagenet21k	0.05	0.01	87019055	1220399	1.4025	2048	62.13
mlp_2		vtab-dtd	sup_vitb16_imagenet21k	0.05	0.01	87019055	1220399	1.4025	2048	62.23
mlp_2		vtab-dtd	sup_vitb16_imagenet21k	0.05	0.01	87019055	1220399	1.4025	2048	62.66
mlp_2		vtab-dtd	swinb_imagenet22k_224	0.1	0.01	88894695	2151471	2.4202	1024	77.77
mlp_2		vtab-dtd	swinb_imagenet22k_224	0.1	0.01	88894695	2151471	2.4202	1024	77.5
mlp_2		vtab-dtd	swinb_imagenet22k_224	0.1	0.01	88894695	2151471	2.4202	1024	77.77
mlp_2		vtab-eurosat	imagenet22k_sup_rnx_base	0.05	0.01	89680010	2113546	2.3568	1024	91.02
mlp_2		vtab-eurosat	imagenet22k_sup_rnx_base	0.05	0.01	89680010	2113546	2.3568	1024	90.59
mlp_2		vtab-eurosat	imagenet22k_sup_rnx_base	0.05	0.01	89680010	2113546	2.3568	1024	90.15
mlp_2		vtab-eurosat	imagenet_sup_rn50	0.1	0.001	31929418	8421386	26.375	2048	89.81
mlp_2		vtab-eurosat	imagenet_sup_rn50	0.1	0.001	31929418	8421386	26.375	2048	90.11
mlp_2		vtab-eurosat	imagenet_sup_rn50	0.1	0.001	31929418	8421386	26.375	2048	90.11
mlp_2		vtab-eurosat	imagenet_sup_rn50	0.25	0.001	31929418	8421386	26.375	2048	91.19
mlp_2		vtab-eurosat	imagenet_sup_rn50	0.25	0.001	31929418	8421386	26.375	2048	90.43
mlp_2		vtab-eurosat	imagenet_sup_rn50	0.25	0.001	31929418	8421386	26.375	2048	89.93
mlp_2		vtab-eurosat	sup_vitb16_imagenet21k	0.1	0.01	86990602	1191946	1.3702	2048	85.74
mlp_2		vtab-eurosat	sup_vitb16_imagenet21k	0.1	0.01	86990602	1191946	1.3702	2048	89.37
mlp_2		vtab-eurosat	sup_vitb16_imagenet21k	0.1	0.01	86990602	1191946	1.3702	2048	89
mlp_2		vtab-eurosat	swinb_imagenet22k_224	0.25	0.001	88856770	2113546	2.3786	1024	90.43
mlp_2		vtab-eurosat	swinb_imagenet22k_224	0.25	0.001	88856770	2113546	2.3786	1024	90.76
mlp_2		vtab-eurosat	swinb_imagenet22k_224	0.25	0.001	88856770	2113546	2.3786	1024	91.59
mlp_2		vtab-kitti(task="closest_vehicle_distance")	imagenet22k_sup_rnx_base	0.5	0	89673860	2107396	2.3501	1024	62.31
mlp_2		vtab-kitti(task="closest_vehicle_distance")	imagenet22k_sup_rnx_base	0.5	0	89673860	2107396	2.3501	1024	63.99
mlp_2		vtab-kitti(task="closest_vehicle_distance")	imagenet22k_sup_rnx_base	0.5	0	89673860	2107396	2.3501	1024	65.12
mlp_2		vtab-kitti(task="closest_vehicle_distance")	imagenet_sup_rn50	0.25	0.0001	31917124	8409092	26.3466	2048	58.37
mlp_2		vtab-kitti(task="closest_vehicle_distance")	imagenet_sup_rn50	0.25	0.0001	31917124	8409092	26.3466	2048	57.67
mlp_2		vtab-kitti(task="closest_vehicle_distance")	imagenet_sup_rn50	0.25	0.0001	31917124	8409092	26.3466	2048	60.62
mlp_2		vtab-kitti(task="closest_vehicle_distance")	sup_vitb16_imagenet21k	0.1	0	86985988	1187332	1.365	2048	60.34
mlp_2		vtab-kitti(task="closest_vehicle_distance")	sup_vitb16_imagenet21k	0.1	0	86985988	1187332	1.365	2048	57.24
mlp_2		vtab-kitti(task="closest_vehicle_distance")	sup_vitb16_imagenet21k	0.1	0	86985988	1187332	1.365	2048	56.68
mlp_2		vtab-kitti(task="closest_vehicle_distance")	swinb_imagenet22k_224	0.25	0.001	88850620	2107396	2.3718	1024	65.4
mlp_2		vtab-kitti(task="closest_vehicle_distance")	swinb_imagenet22k_224	0.25	0.001	88850620	2107396	2.3718	1024	67.51
mlp_2		vtab-kitti(task="closest_vehicle_distance")	swinb_imagenet22k_224	0.25	0.001	88850620	2107396	2.3718	1024	66.39
mlp_2		vtab-oxford_flowers102	imagenet22k_sup_rnx_base	0.05	0.001	89774310	2207846	2.4593	1024	99.09
mlp_2		vtab-oxford_flowers102	imagenet22k_sup_rnx_base	0.05	0.001	89774310	2207846	2.4593	1024	99.07
mlp_2		vtab-oxford_flowers102	imagenet22k_sup_rnx_base	0.05	0.001	89774310	2207846	2.4593	1024	99.27
mlp_2		vtab-oxford_flowers102	imagenet_sup_rn50	0.05	0.01	32117926	8609894	26.8071	2048	80.86
mlp_2		vtab-oxford_flowers102	imagenet_sup_rn50	0.05	0.01	32117926	8609894	26.8071	2048	80.45
mlp_2		vtab-oxford_flowers102	imagenet_sup_rn50	0.05	0.01	32117926	8609894	26.8071	2048	80.26
mlp_2		vtab-oxford_flowers102	sup_vitb16_imagenet21k	0.05	0.01	87061350	1262694	1.4503	2048	97.41
mlp_2		vtab-oxford_flowers102	sup_vitb16_imagenet21k	0.05	0.01	87061350	1262694	1.4503	2048	97.5
mlp_2		vtab-oxford_flowers102	sup_vitb16_imagenet21k	0.05	0.01	87061350	1262694	1.4503	2048	97.37
mlp_2		vtab-oxford_flowers102	swinb_imagenet22k_224	0.1	0.01	88951070	2207846	2.4821	1024	99.58
mlp_2		vtab-oxford_flowers102	swinb_imagenet22k_224	0.1	0.01	88951070	2207846	2.4821	1024	99.54
mlp_2		vtab-oxford_flowers102	swinb_imagenet22k_224	0.1	0.01	88951070	2207846	2.4821	1024	99.56
mlp_2		vtab-oxford_iiit_pet	imagenet22k_sup_rnx_base	0.1	0.01	89707685	2141221	2.3869	1024	91.41
mlp_2		vtab-oxford_iiit_pet	imagenet22k_sup_rnx_base	0.1	0.01	89707685	2141221	2.3869	1024	91.44
mlp_2		vtab-oxford_iiit_pet	imagenet22k_sup_rnx_base	0.1	0.01	89707685	2141221	2.3869	1024	91.31
mlp_2		vtab-oxford_iiit_pet	imagenet_sup_rn50	0.05	0.01	31984741	8476709	26.5024	2048	87.87
mlp_2		vtab-oxford_iiit_pet	imagenet_sup_rn50	0.05	0.01	31984741	8476709	26.5024	2048	88.14
mlp_2		vtab-oxford_iiit_pet	imagenet_sup_rn50	0.05	0.01	31984741	8476709	26.5024	2048	87.79
mlp_2		vtab-oxford_iiit_pet	imagenet_sup_rn50	0.25	0.0001	31984741	8476709	26.5024	2048	83.62
mlp_2		vtab-oxford_iiit_pet	imagenet_sup_rn50	0.25	0.0001	31984741	8476709	26.5024	2048	85.55
mlp_2		vtab-oxford_iiit_pet	imagenet_sup_rn50	0.25	0.0001	31984741	8476709	26.5024	2048	85.5
mlp_2		vtab-oxford_iiit_pet	sup_vitb16_imagenet21k	0.1	0.01	87011365	1212709	1.3937	2048	84.85
mlp_2		vtab-oxford_iiit_pet	sup_vitb16_imagenet21k	0.1	0.01	87011365	1212709	1.3937	2048	84.3
mlp_2		vtab-oxford_iiit_pet	sup_vitb16_imagenet21k	0.1	0.01	87011365	1212709	1.3937	2048	85.01
mlp_2		vtab-oxford_iiit_pet	swinb_imagenet22k_224	0.1	0.01	88884445	2141221	2.409	1024	90.54
mlp_2		vtab-oxford_iiit_pet	swinb_imagenet22k_224	0.1	0.01	88884445	2141221	2.409	1024	91.01
mlp_2		vtab-oxford_iiit_pet	swinb_imagenet22k_224	0.1	0.01	88884445	2141221	2.409	1024	90.84
mlp_2		vtab-patch_camelyon	imagenet22k_sup_rnx_base	0.1	0	89671810	2105346	2.3478	1024	82.04
mlp_2		vtab-patch_camelyon	imagenet22k_sup_rnx_base	0.1	0	89671810	2105346	2.3478	1024	81.76
mlp_2		vtab-patch_camelyon	imagenet22k_sup_rnx_base	0.1	0	89671810	2105346	2.3478	1024	81.95
mlp_2		vtab-patch_camelyon	imagenet_sup_rn50	0.05	0.01	31913026	8404994	26.3372	2048	79.78
mlp_2		vtab-patch_camelyon	imagenet_sup_rn50	0.05	0.01	31913026	8404994	26.3372	2048	79.71
mlp_2		vtab-patch_camelyon	imagenet_sup_rn50	0.05	0.01	31913026	8404994	26.3372	2048	77.06
mlp_2		vtab-patch_camelyon	sup_vitb16_imagenet21k	0.05	0.001	86984450	1185794	1.3632	2048	74.4
mlp_2		vtab-patch_camelyon	sup_vitb16_imagenet21k	0.05	0.001	86984450	1185794	1.3632	2048	77.29
mlp_2		vtab-patch_camelyon	sup_vitb16_imagenet21k	0.05	0.001	86984450	1185794	1.3632	2048	79.36
mlp_2		vtab-patch_camelyon	swinb_imagenet22k_224	0.05	0	88848570	2105346	2.3696	1024	83.19
mlp_2		vtab-patch_camelyon	swinb_imagenet22k_224	0.05	0	88848570	2105346	2.3696	1024	83.42
mlp_2		vtab-patch_camelyon	swinb_imagenet22k_224	0.05	0	88848570	2105346	2.3696	1024	81.6
mlp_2		vtab-resisc45	imagenet22k_sup_rnx_base	0.1	0.0001	89715885	2149421	2.3958	1024	77.56
mlp_2		vtab-resisc45	imagenet22k_sup_rnx_base	0.1	0.0001	89715885	2149421	2.3958	1024	79.11
mlp_2		vtab-resisc45	imagenet22k_sup_rnx_base	0.1	0.0001	89715885	2149421	2.3958	1024	78.6
mlp_2		vtab-resisc45	imagenet_sup_rn50	0.05	0.01	32001133	8493101	26.54	2048	71.17
mlp_2		vtab-resisc45	imagenet_sup_rn50	0.05	0.01	32001133	8493101	26.54	2048	71.22
mlp_2		vtab-resisc45	imagenet_sup_rn50	0.05	0.01	32001133	8493101	26.54	2048	71.56
mlp_2		vtab-resisc45	sup_vitb16_imagenet21k	0.05	0.01	87017517	1218861	1.4007	2048	70.71
mlp_2		vtab-resisc45	sup_vitb16_imagenet21k	0.05	0.01	87017517	1218861	1.4007	2048	69.83
mlp_2		vtab-resisc45	sup_vitb16_imagenet21k	0.05	0.01	87017517	1218861	1.4007	2048	69.95
mlp_2		vtab-resisc45	swinb_imagenet22k_224	0.1	0.01	88892645	2149421	2.418	1024	81.44
mlp_2		vtab-resisc45	swinb_imagenet22k_224	0.1	0.01	88892645	2149421	2.418	1024	81.25
mlp_2		vtab-resisc45	swinb_imagenet22k_224	0.1	0.01	88892645	2149421	2.418	1024	81.81
mlp_2		vtab-smallnorb(predicted_attribute="label_azimuth")	imagenet22k_sup_rnx_base	0.1	0.001	89688210	2121746	2.3657	1024	18.21
mlp_2		vtab-smallnorb(predicted_attribute="label_azimuth")	imagenet22k_sup_rnx_base	0.1	0.001	89688210	2121746	2.3657	1024	18.32
mlp_2		vtab-smallnorb(predicted_attribute="label_azimuth")	imagenet22k_sup_rnx_base	0.1	0.001	89688210	2121746	2.3657	1024	17.99
mlp_2		vtab-smallnorb(predicted_attribute="label_azimuth")	imagenet_sup_rn50	0.1	0	31945810	8437778	26.4128	2048	12.41
mlp_2		vtab-smallnorb(predicted_attribute="label_azimuth")	imagenet_sup_rn50	0.1	0	31945810	8437778	26.4128	2048	10.53
mlp_2		vtab-smallnorb(predicted_attribute="label_azimuth")	imagenet_sup_rn50	0.1	0	31945810	8437778	26.4128	2048	10.65
mlp_2		vtab-smallnorb(predicted_attribute="label_azimuth")	sup_vitb16_imagenet21k	0.1	0	86996754	1198098	1.3772	2048	15.42
mlp_2		vtab-smallnorb(predicted_attribute="label_azimuth")	sup_vitb16_imagenet21k	0.1	0	86996754	1198098	1.3772	2048	15.09
mlp_2		vtab-smallnorb(predicted_attribute="label_azimuth")	sup_vitb16_imagenet21k	0.1	0	86996754	1198098	1.3772	2048	15.02
mlp_2		vtab-smallnorb(predicted_attribute="label_azimuth")	swinb_imagenet22k_224	0.25	0.001	88864970	2121746	2.3876	1024	16.96
mlp_2		vtab-smallnorb(predicted_attribute="label_azimuth")	swinb_imagenet22k_224	0.25	0.001	88864970	2121746	2.3876	1024	15.15
mlp_2		vtab-smallnorb(predicted_attribute="label_azimuth")	swinb_imagenet22k_224	0.25	0.001	88864970	2121746	2.3876	1024	16.43
mlp_2		vtab-smallnorb(predicted_attribute="label_elevation")	imagenet22k_sup_rnx_base	0.05	0	89678985	2112521	2.3556	1024	30.08
mlp_2		vtab-smallnorb(predicted_attribute="label_elevation")	imagenet22k_sup_rnx_base	0.05	0	89678985	2112521	2.3556	1024	29.79
mlp_2		vtab-smallnorb(predicted_attribute="label_elevation")	imagenet22k_sup_rnx_base	0.05	0	89678985	2112521	2.3556	1024	29.87
mlp_2		vtab-smallnorb(predicted_attribute="label_elevation")	imagenet22k_sup_rnx_base	0.25	0.001	89678985	2112521	2.3556	1024	30.95
mlp_2		vtab-smallnorb(predicted_attribute="label_elevation")	imagenet_sup_rn50	0.1	0.001	31927369	8419337	26.3703	2048	26.17
mlp_2		vtab-smallnorb(predicted_attribute="label_elevation")	imagenet_sup_rn50	0.1	0.001	31927369	8419337	26.3703	2048	25.66
mlp_2		vtab-smallnorb(predicted_attribute="label_elevation")	imagenet_sup_rn50	0.1	0.001	31927369	8419337	26.3703	2048	26.07
mlp_2		vtab-smallnorb(predicted_attribute="label_elevation")	sup_vitb16_imagenet21k	0.1	0.0001	86989833	1191177	1.3693	2048	24.49
mlp_2		vtab-smallnorb(predicted_attribute="label_elevation")	sup_vitb16_imagenet21k	0.1	0.0001	86989833	1191177	1.3693	2048	24.68
mlp_2		vtab-smallnorb(predicted_attribute="label_elevation")	sup_vitb16_imagenet21k	0.1	0.0001	86989833	1191177	1.3693	2048	25.23
mlp_2		vtab-smallnorb(predicted_attribute="label_elevation")	swinb_imagenet22k_224	0.25	0.001	88855745	2112521	2.3775	1024	30.67
mlp_2		vtab-smallnorb(predicted_attribute="label_elevation")	swinb_imagenet22k_224	0.25	0.001	88855745	2112521	2.3775	1024	32.12
mlp_2		vtab-smallnorb(predicted_attribute="label_elevation")	swinb_imagenet22k_224	0.25	0.001	88855745	2112521	2.3775	1024	28.79
mlp_2		vtab-sun397	imagenet22k_sup_rnx_base	0.5	0.01	90076685	2510221	2.7868	1024	47.74
mlp_2		vtab-sun397	imagenet22k_sup_rnx_base	0.5	0.01	90076685	2510221	2.7868	1024	48.95
mlp_2		vtab-sun397	imagenet22k_sup_rnx_base	0.5	0.01	90076685	2510221	2.7868	1024	50.8
mlp_2		vtab-sun397	imagenet_sup_rn50	0.05	0.01	32722381	9214349	28.1592	2048	33.39
mlp_2		vtab-sun397	imagenet_sup_rn50	0.05	0.01	32722381	9214349	28.1592	2048	33.65
mlp_2		vtab-sun397	imagenet_sup_rn50	0.05	0.01	32722381	9214349	28.1592	2048	33.68
mlp_2		vtab-sun397	sup_vitb16_imagenet21k	0.05	0.01	87288205	1489549	1.7065	2048	49.37
mlp_2		vtab-sun397	sup_vitb16_imagenet21k	0.05	0.01	87288205	1489549	1.7065	2048	49.12
mlp_2		vtab-sun397	sup_vitb16_imagenet21k	0.05	0.01	87288205	1489549	1.7065	2048	49.14
mlp_2		vtab-sun397	swinb_imagenet22k_224	0.5	0.001	89253445	2510221	2.8125	1024	52.99
mlp_2		vtab-sun397	swinb_imagenet22k_224	0.5	0.001	89253445	2510221	2.8125	1024	53.13
mlp_2		vtab-sun397	swinb_imagenet22k_224	0.5	0.001	89253445	2510221	2.8125	1024	53.43
mlp_2		vtab-svhn	imagenet22k_sup_rnx_base	0.05	0.0001	89680010	2113546	2.3568	1024	45.26
mlp_2		vtab-svhn	imagenet22k_sup_rnx_base	0.05	0.0001	89680010	2113546	2.3568	1024	45.85
mlp_2		vtab-svhn	imagenet22k_sup_rnx_base	0.05	0.0001	89680010	2113546	2.3568	1024	46.1
mlp_2		vtab-svhn	imagenet_sup_rn50	0.05	0	31929418	8421386	26.375	2048	40.13
mlp_2		vtab-svhn	imagenet_sup_rn50	0.05	0	31929418	8421386	26.375	2048	39.17
mlp_2		vtab-svhn	imagenet_sup_rn50	0.05	0	31929418	8421386	26.375	2048	38.71
mlp_2		vtab-svhn	sup_vitb16_imagenet21k	0.1	0.01	86990602	1191946	1.3702	2048	32.55
mlp_2		vtab-svhn	sup_vitb16_imagenet21k	0.1	0.01	86990602	1191946	1.3702	2048	32.43
[truncated: 1,398 more rows]

## Sheet: VPT
type	total_prompt / reduction rate	data	feature	lr	wd	batch_size	l-test_top1
prompt	5	vtab-caltech101	sup_vitb16_imagenet21k	2.5	0.001	128	87.06
							86.79
							86.97
	100	vtab-cifar(num_classes=100)		10	0.001	64	77.78
							78.03
							77.16
	1	vtab-dtd		10	0	128	63.19
							62.5
							62.02
	200	vtab-oxford_flowers102		25	0.001	64	97.63
							97.51
							97.46
	50	vtab-oxford_iiit_pet		2.5	0.001	128	87.24
							87.08
							87.44
	1	vtab-sun397		1	0	128	51.29
							51.17
							51.05
	200	vtab-svhn		0.5	0.01	64	73.62
							74.51
							75.48
prompt	5	vtab-patch_camelyon	sup_vitb16_imagenet21k	1	0.01	128	76.84
							79.43
							78.2
	50	vtab-resisc45		10	0.001	128	74.7
							76.22
							75.79
	50	vtab-eurosat		100	0.001	128	91.72
							93.02
							91.24
	10	vtab-diabetic_retinopathy(config="btgraham-300")		0.1	0.01	128	72.47
							73.81
							72.53
prompt	100	vtab-dmlab	sup_vitb16_imagenet21k	500	0	64	39.05
							40
							42.32
	100	vtab-kitti(task="closest_vehicle_distance")		250	0	64	66.53
							67.65
							67.09
	200	vtab-smallnorb(predicted_attribute="label_azimuth")		1	0.01	64	20.05
							20.2
							20.41
	200	vtab-smallnorb(predicted_attribute="label_elevation")		500	0	64	31.41
							34.05
							36.88
	100	vtab-dsprites(predicted_attribute="label_x_position",num_classes=16)		1	0.01	64	73.84
							59.4
							72.78
	100	vtab-dsprites(predicted_attribute="label_orientation",num_classes=16)		0.5	0.01	64	36.09
							36.15
							36.17
	200	vtab-clevr(task="closest_object_distance")		2.5	0.01	64	57.63
							58.67
							59.54
	100	vtab-clevr(task="count_all")		500	0	64	48.31
							53.31
							49.99

## Sheet: Linear
type	data	feature	lr	wd	batch_size	l-test_top1
linear	vtab-caltech101	sup_vitb16_imagenet21k	2.5	0.001	2048	85.55
						85.47
						85.47
	vtab-cifar(num_classes=100)		0.1	0		63.48
						63.08
						63.51
	vtab-dtd		1	0		63.19
						62.93
						63.51
	vtab-oxford_flowers102		0.1	0.001		97.02
						96.99
						97.02
	vtab-oxford_iiit_pet		0.25	0.001		86.26
						86.24
						86.32
	vtab-sun397		0.5	0		51.02
						51.04
						50.97
	vtab-svhn		0.25	0.01		36.6
						36.59
						36.65
linear	vtab-patch_camelyon	sup_vitb16_imagenet21k	0.05	0.01	2048	78.75
						77.99
						78.82
	vtab-resisc45		0.5	0		68.6
						69.16
						68.4
	vtab-eurosat		10	0.0001		86.63
						86.67
						89.19
	vtab-diabetic_retinopathy(config="btgraham-300")		0.1	0.01		73.95
						74.08
						74.02
linear	vtab-dmlab	sup_vitb16_imagenet21k	0.5	0	2048	33.39
						33.25
						32.93
	vtab-kitti(task="closest_vehicle_distance")		5	0		56.12
						53.31
						56.68
	vtab-smallnorb(predicted_attribute="label_azimuth")		2.5	0.01		10.37
						9.75
						8.58
	vtab-smallnorb(predicted_attribute="label_elevation")		2.5	0.01		19.89
						17.62
						20.01
	vtab-dsprites(predicted_attribute="label_x_position",num_classes=16)		5	0		12.92
						11.46
						13.19
	vtab-dsprites(predicted_attribute="label_orientation",num_classes=16)		0.1	0		19.53
						20.94
						19.62
	vtab-clevr(task="closest_object_distance")		0.5	0.001		30.17
						30.93
						30.57
	vtab-clevr(task="count_all")		0.1	0		34.57
						34.3
						34.06
